# Supplementary material for: Chromosomal Inversion Polymorphisms in Two Sympatric Ascidian Lineages
Source: PubMed Central journal article supplement — Genome Biol Evol. 2021 Apr 2;13(6):evab068. doi: 10.1093/gbe/evab068 (PMC8186479; doi:10.1093/gbe/evab068), 2021-04-02
Supplement: evab068_supplementary_data.pdf [file evab068_supplementary_data.pdf]

1 **Supplementary Figures and Tables for**

2 **Chromosomal inversion polymorphisms in two sympatric ascidian lineages**

3

4 **Yutaka Satou<sup>1,+,\*</sup>, Atsuko Sato<sup>2-4,+</sup>, Hitoyoshi Yasuo<sup>5,+</sup>, Yukie Mihirogi<sup>2</sup>, John Bishop<sup>3</sup>,**  
5 **Manabu Fujie<sup>6</sup>, Mayumi Kawamitsu<sup>6</sup>, Kanako Hisata<sup>7</sup>, and Noriyuki Satoh<sup>7</sup>**

6

7 <sup>1</sup> Department of Zoology, Graduate School of Science, Kyoto University, Sakyo, Kyoto, 606-  
8 8502, Japan

9 <sup>2</sup> Department of Biology, Ochanomizu University, Otsuka, Bunkyo-ku, 112-8610 Japan.

10 <sup>3</sup> Marine Biological Association of the UK, The Laboratory, Citadel Hill, Plymouth, PL1 2PB,  
11 United Kingdom.

12 <sup>4</sup> Graduate School of Life Sciences, Tohoku University, 6-3, Aramaki Aza Aoba, Aoba-ku,  
13 Sendai 980-8578, Japan.

14 <sup>5</sup> Sorbonne Université, CNRS, Laboratoire de Biologie du Développement de Villefranche-sur-  
15 mer (LBDV), 06230 Villefranche-sur-mer, France.

16 <sup>6</sup> DNA Sequencing Section, Okinawa Institute of Science and Technology Graduate University,  
17 Onna, Okinawa 904-0495, Japan

18 <sup>7</sup> Marine Genomics Unit, Okinawa Institute of Science and Technology Graduate University,  
19 Onna, Okinawa 904-0495, Japan

20 + These authors equally contributed to this work.

21

22 \* Correspondence to Yutaka Satou (yutaka@ascidian.zool.kyoto-u.ac.jp)

23 **This PDF document contains:**

24 **supplementary figures S1 to S10**

25 **supplementary tables S1 to S7**

26

Figure S1

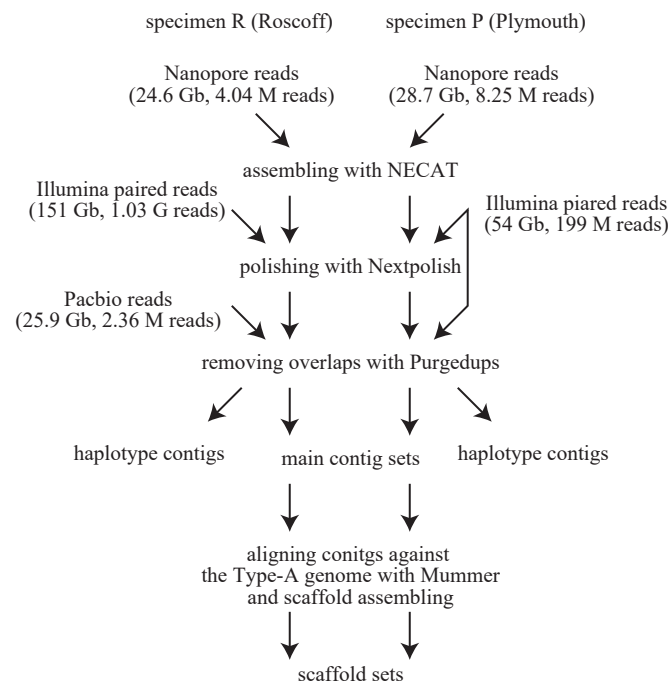

**Supplementary Figure S1. Chromosomal assembly of two *Ciona intestinalis* type-B individuals.** The assembling strategy adopted in the present study.

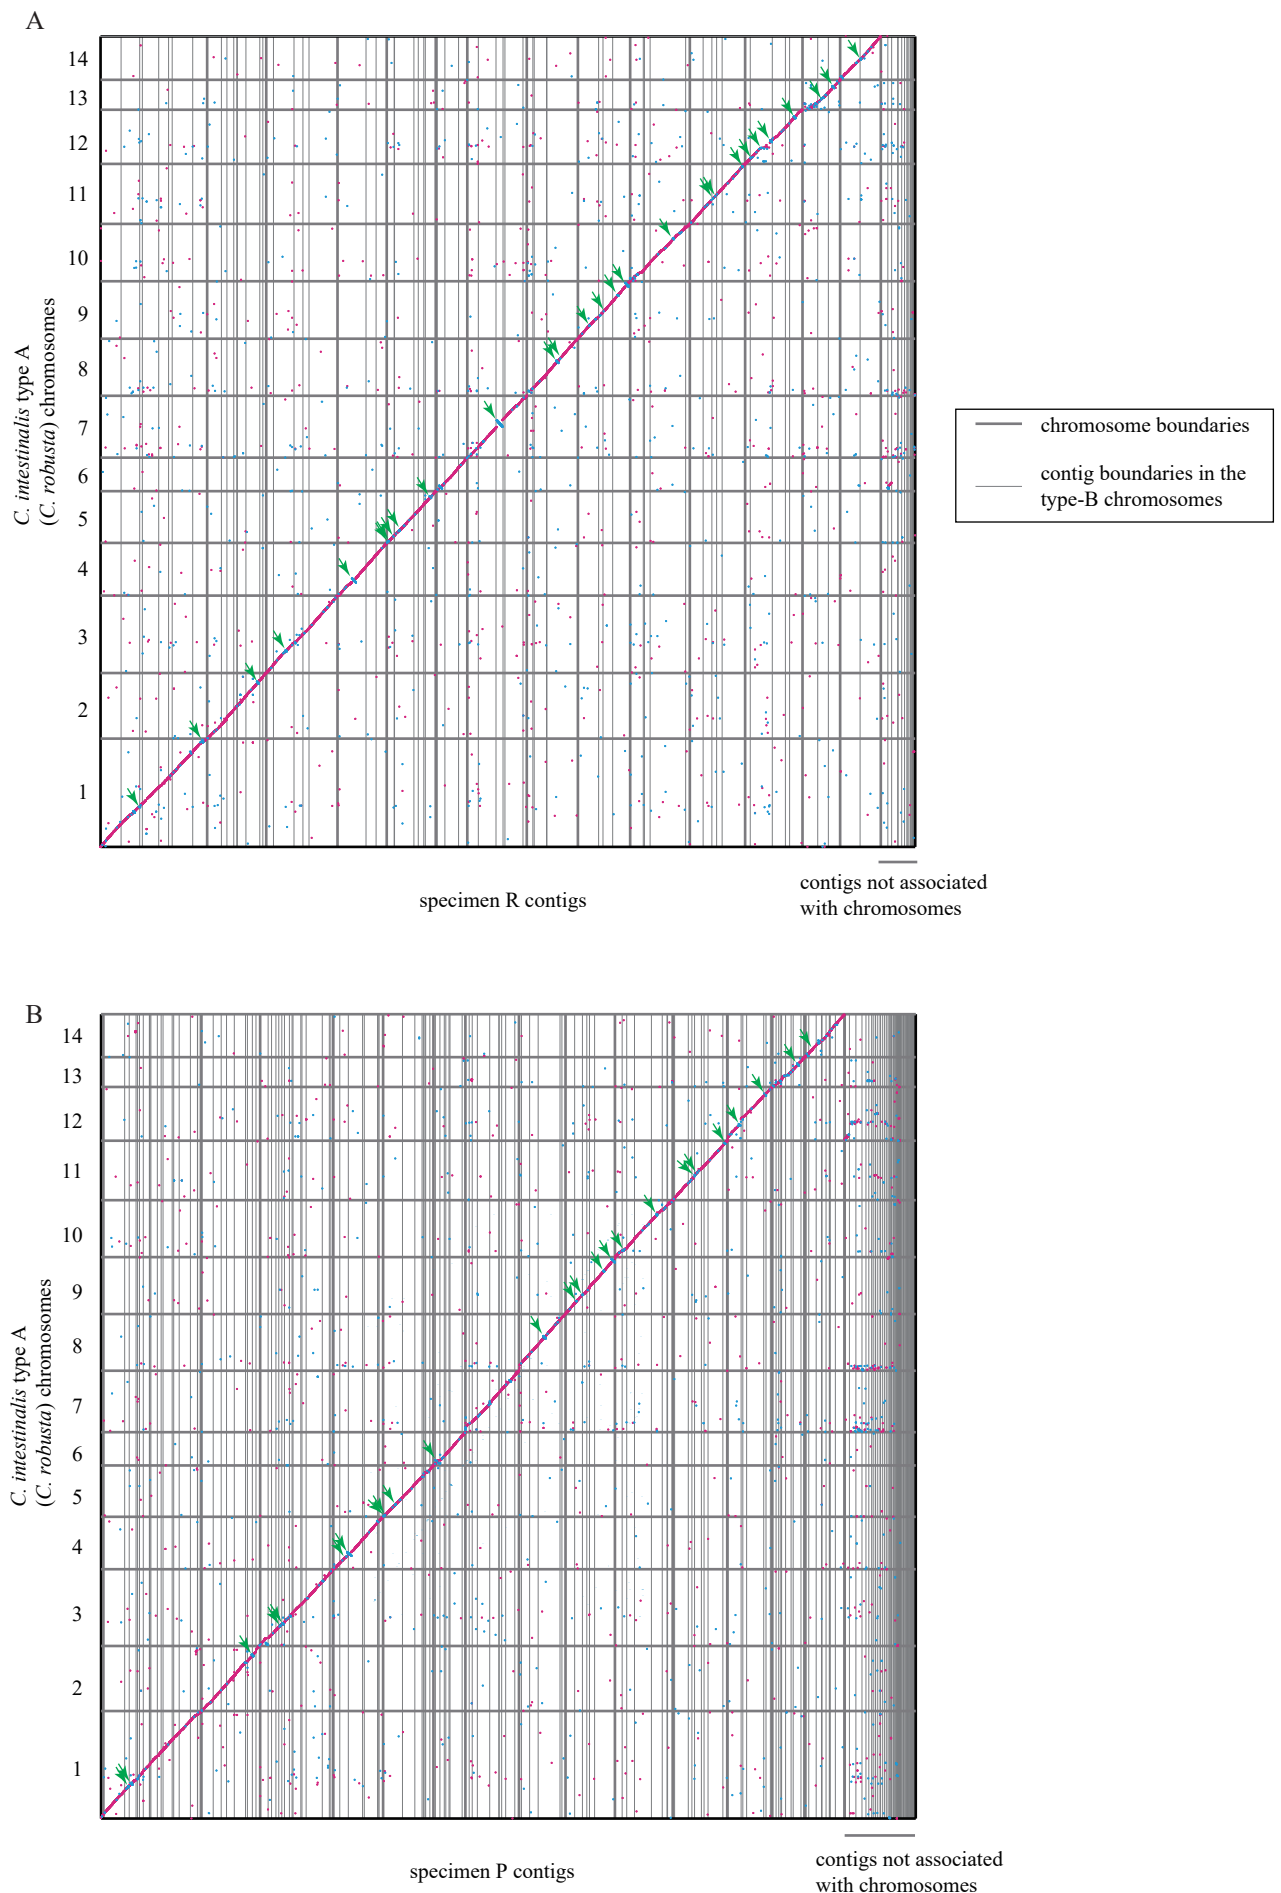

**Supplementary Figure S2. Alignments of all contigs against the inbred type-A genome.** Contigs for (A) specimen R and (B) specimen P are sorted on the basis of the alignments. Forward-to-forward alignments are shown by magenta, and Forward-to-reverse alignments are shown by cyan. Green arrows indicate inversions identified from gene orders and genomic alignments.

Figure S3

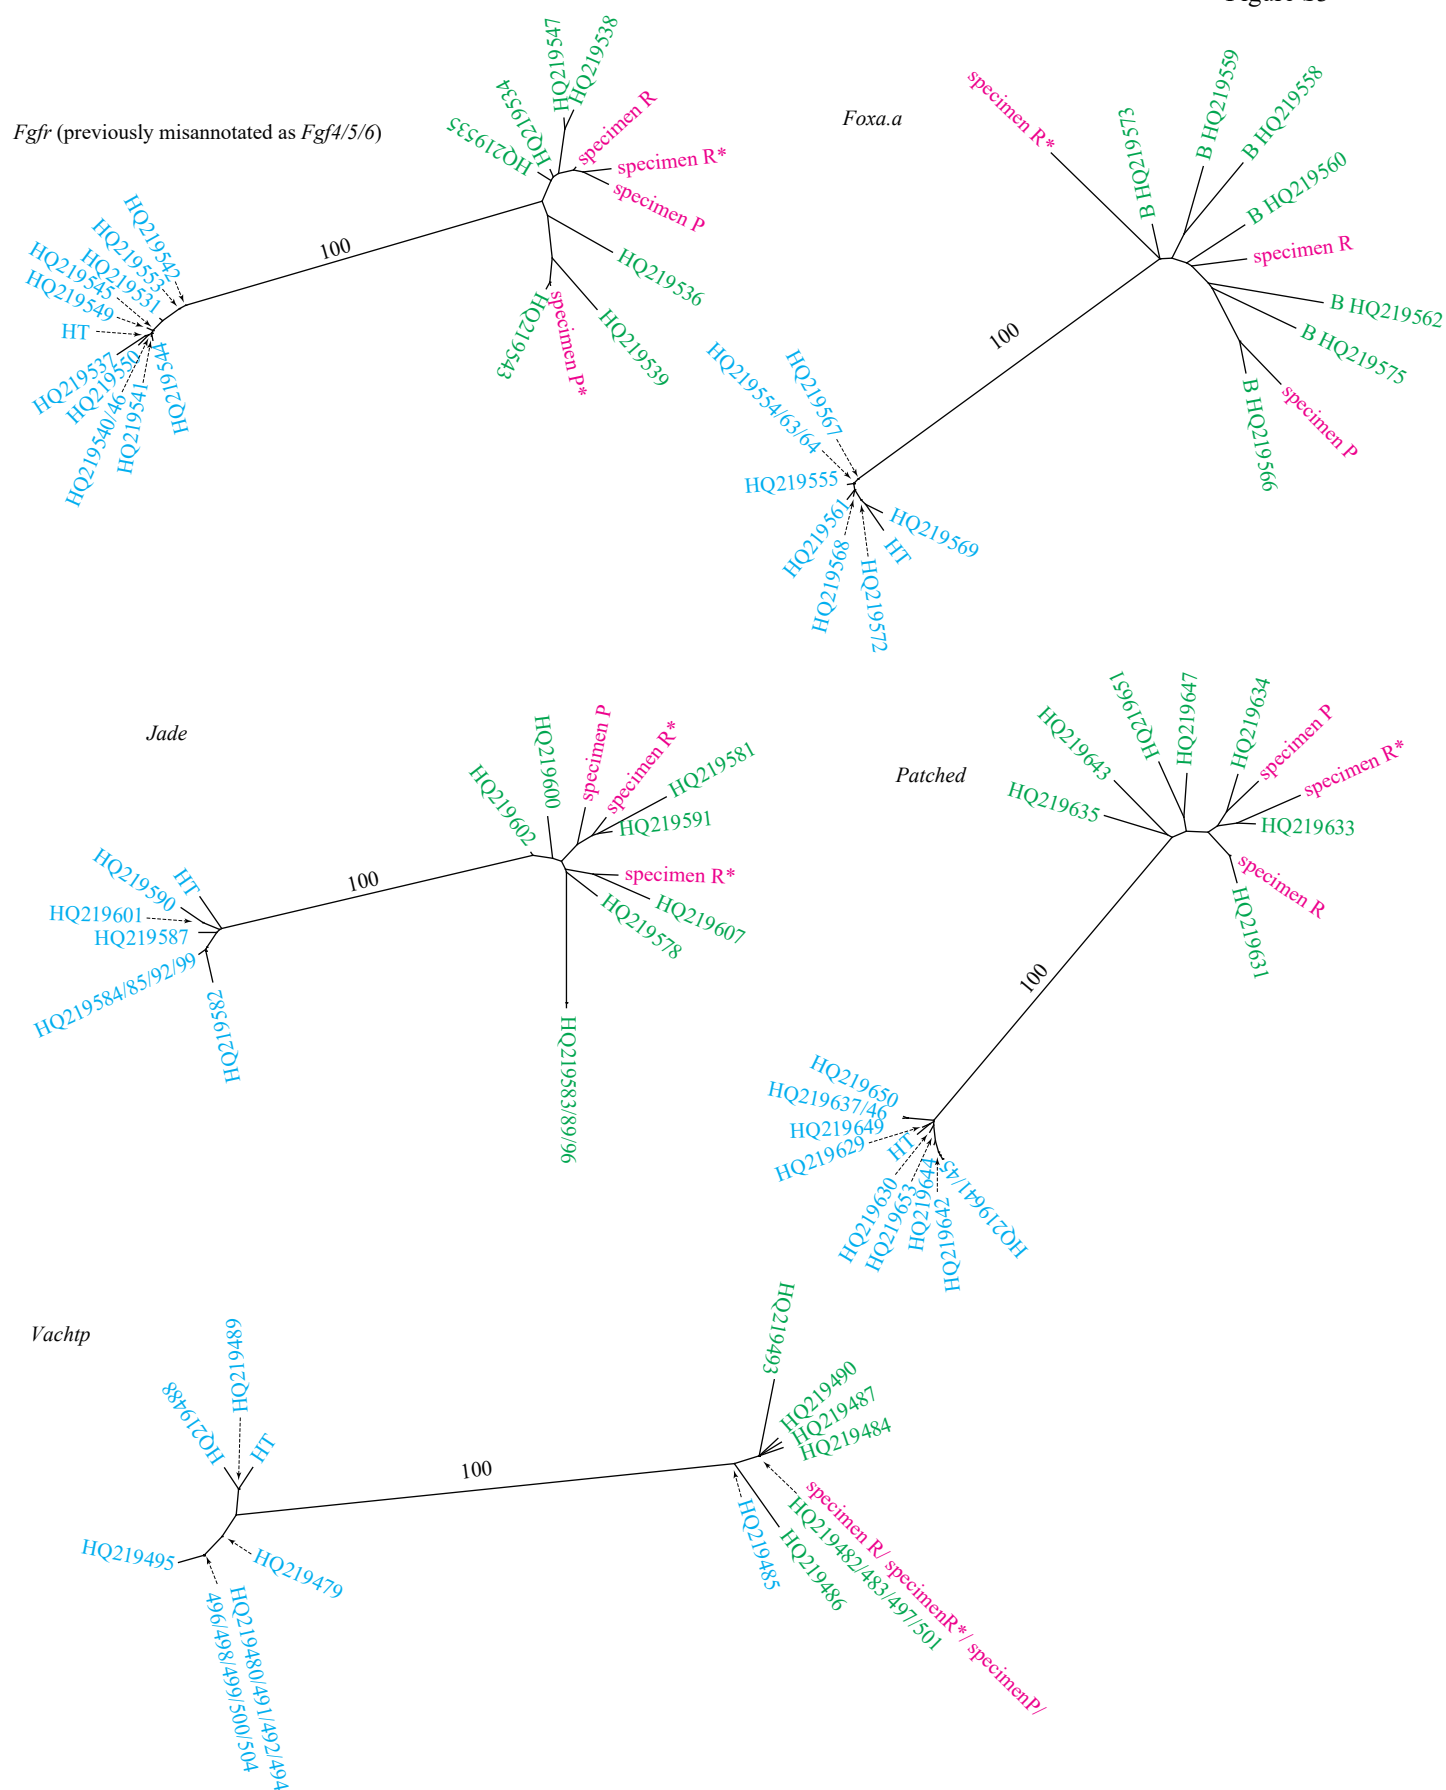

**Supplementary Figure S3. Molecular phylogenetic analyses to confirm that the animals we used were type B.** The sequences retrieved from chromosomes and haplotype contigs of specimens R and P are shown by magenta. Sequences retrieved from haplotype contigs are marked by asterisks. Note that *Jade* was not found in the specimen-R chromosomes, but two *Jade* loci were found in the specimen-R haplotype contig set. The sequences from the inbred type-A animals (HT-line) are shown by 'HT'. Labels for other sequences indicate their accession numbers for the DDBJ/EMBL/Genbank database. Sequences for type-A and type-B animals are shown in cyan and green, respectively. These classifications are based on a previous study (Nydam and Harrison 2011), although HQ219485 is likely to be mis-annotated. Separation between type-A and type-B animals is supported by 100 bootstrap pseudoreplications. The alignments before removing gaps are shown in figure S4.



HQ219553 (A) -----CTTGTTAGCTATTTTCGTTACGGTAGCGAAG---ATTAATAATGGACA  
HQ219550 (A) -----CTTGTTAGCTATTTTCGTTACGGTAGCGAAG---ATTAATAATGGACA  
HQ219549 (A) -----CTTGTTAGCTATTTTCGTTACGGTAGCGAAG---ATTAATAATGGACA  
HQ219546 (A) -----CTTGTTAGCTATTTTCGTTACGGTAGCGAAG---ATTAATAATGGACA  
HQ219545 (A) -----CTTGTTAGCTATTTTCGTTACGGTAGCGAAG---ATTAATAATGGACA  
HQ219544 (A) -----CTTGTTAGCTATTTTCGTTACGGTAGCGAAG---ATTAATAATGGACA  
HQ219542 (A) -----CTTGTTAGCTATTTTCGTTACGGTAGCGAAG---ATTAATAATGGACA  
HQ219541 (A) -----CTTGTTAGCTATTTTCGTTACGGTAGCGAAG---ATTAATAATGGACA  
HQ219540 (A) -----CTTGTTAGCTATTTTCGTTACGGTAGCGAAG---ATTAATAATGGACA  
HQ219537 (A) -----CTTGTTAGCTATTTTCGTTACGGTAGCGAAG---ATTAATAATGGACA  
HQ219531 (A) -----CTTGTTAGCTATTTTCGTTACGGTAGCGAAG---ATTAATAATGGACA  
HQ219547 (B) -----AACATAACTTGTATTCTCTTCGATTACGTTAGCGAAGATTAATAATGATGGACA  
HQ219543 (B) -----CATAACTTGTATTCTCTTCGATTACGTTAGCGAAGATTAATAATAATGGACA  
HQ219539 (B) -----CATAACTTGTATTCTCTTCGATTACGTTAGCGAAGATTAATAATAATGGACA  
HQ219538 (B) -----AACATAACTTGTATTCTCTTCGATTACGTTAGCGAAGATTAATAATGATGGACA  
HQ219536 (B) -----ATAACTTATTATCTCTTCGATTACGTTAGCGAAG---ATTAATAATGGACA  
HQ219535 (B) -----TAACTTGTATTCTCTTCGATTACGTTAGCGAAG---ATTAATAATGGACA  
HQ219534 (B) -----TATATAACATAACTTGTATTCTCTTCGATTACGTTAGCGAAG---ATTAATAATGGACA  
HT (TYPE A) -----CTTGTTAGCTATTTTCGTTACGGTAGCGAAG---ATTAATAATGGACA  
specimen P TAACATAACTTTATAATACAGATATAACATAACTTGTATTCTCTTCGATTACGTTAGCGAAGATTAATAATGATGGACA  
specimen P\* -----CATAACTTGTATTCTCTTCGATTACGTTAGCGAAGATTAATAATAATGGACA  
specimen R -----TATATAACATAACTTGTATTCTCTTCGATTACGTTAGCGAAGATTAATAATGATGGACA  
specimen R\* -----T-----AACATAACTTGTATTCTCTTCGATTACGTTAGCGAAGATTAATAATGATGGACA

HQ219553 (A) CGAGCGAAACGACGGGATATAGCGACAAAAACAACAGTCGTTAAAAACCGCTCACGGTTAAAAACG-----AACATTA  
HQ219550 (A) CGAGCGAAACGACGGGATATAGCGACAAAAACAACAGTCGTTAAAAACCGCTCACGGTTAAAAACG-----AACATTA  
HQ219549 (A) CGAGCGAAACGACGGGATATAGCGACAAAAACAACAGTCGTTAAAAACCGCTCACGGTTAAAAACG-----AACATTA  
HQ219546 (A) CGAGCGAAACGACGGGATATAGCGACAAAAACAACAGTCGTTAAAAACCGCTCACGGTTAAAAACG-----AACATTA  
HQ219545 (A) CGAGCGAAACGACGGGATATAGCGACAAAAACAACAGTCGTTAAAAACCGCTCACGGTTAAAAACG-----AACATTA  
HQ219544 (A) CGAGCGAAACGACGGGATATAGCGACAAAAACAACAGTCGTTAAAAACCGCTCACGGTTAAAAACG-----AACATTA  
HQ219542 (A) CGAGCGAAACGACGGGATATAGCGACAAAAACAACAGTCGTTAAAAACCGCTCACGGTTAAAAACG-----AACATTA  
HQ219541 (A) CGAGCGAAACGACGGGATATAGCGACAAAAACAACAGTCGTTAAAAACCGCTCACGGTTAAAAACG-----AACATTA  
HQ219540 (A) CGAGCGAAACGACGGGATATAGCGACAAAAACAACAGTCGTTAAAAACCGCTCACGGTTAAAAACG-----AACATTA  
HQ219537 (A) CGAGCGAAACGACGGGATATAGCGACAAAAACAACAGTCGTTAAAAACCGCTCACGGTTAAAAACG-----AACATTA  
HQ219531 (A) CGAGCGAAACGACGGGATATAGCGACAAAAACAACAGTCGTTAAAAACCGCTCACGGTTAAAAACG-----AACATTA  
HQ219547 (B) CAAACGAAACGACGATGATATAGCGACAAAAACAACAGTCATTAAAAACCGCTCATGCT-AATA-CGTACATTGGTACATAA  
HQ219543 (B) CGAACGAAACGACGGGATATAGCGACAAAAACAACAGTCGTTAAAAACCGCTCATGTTTAAATACGT-----ACATAA  
HQ219539 (B) CGAACGAAACGACGGGATATAGCGACAAAAACAACAGTCGTTAAAAACCGCTCATGTTTAAATA-CG-----AACATAA  
HQ219538 (B) CAAACGAAACGACGATGATATAGCGACAAAAACAACAGTCATTAAAAACCGCTCATGCT-AATA-CGTACATTGGTACATAA  
HQ219536 (B) CGAACAAAAACGACGAGATATAGCGACAAAAACAACAGTCGTTAAAAACCGCTCACGGTTAAAAACG-----AACATAA  
HQ219535 (B) CGAACGAAACGACGATGATATAGCGACAAAAACAACAGTCGTTAAAAACCGCTCACGGTTAAAAACG-----AACATAA  
HQ219534 (B) CAAACGAAACGACGATGATATAGCGACAAAAACAACAGTCGTTAAAAACCGCTCACGGTTAAAA-CG-----AACATAA  
HT (TYPE A) CGAGCGAAACGACGGGATATAGCGACAAAAACAACAGTCGTTAAAAACCGCTCACGGTTAAAAACG-----AACATTA  
specimen P CGAACAAAAACGACGAGATATAGCGACAAAAACAACAGTCGTTAAAAACCGCTCACGGTTAAAA-CG-----AACATAA  
specimen P\* CGAACGAAACGACGGGATATAGCGACAAAAACAACAGTCGTTAAAAACCGCTCATGTTTAAATA-CGT-----ACATAA  
specimen R CGAACAAAAACGACGAGATATAGCGACAAAAACAACAGTCGTTAAAAACCGCTCACGGTTAAAA-CG-----AACATAA  
specimen R\* CGAACAAAAACGACGAGATATAGCGACAAAAACAACAGTCGTTAAAAACCGCTCACGGTTAAAA-CG-----AACATAA

HQ219553 (A) CTGAACAATTA AAAAGAGTGGTTGCTACACATAGCAGACAAATACCTTTACAAGTTAACACACACTTATTAGTTATTACT  
HQ219550 (A) CTGAACAATTA AAAAGAGTGGTTGCTACACATAGCAGACAAATACCTTTACAAGTTAACACACACTTATTAGTTATTACT  
HQ219549 (A) CTGAACAATTA AAAAGAGTGGTTGCTACACATAGCAGACAAATACCTTTACAAGTTAACACACACTTATTAGTTATTACT  
HQ219546 (A) CTGAACAATTA AAAAGAGTGGTTGCTACACATAGCAGACAAATACCTTTACAAGTTAACACACACTTATTAGTTATTACT  
HQ219545 (A) CTGAACAATTA AAAAGAGTGGTTGCTACACATAGCAGACAAATACCTTTACAAGTTAACACACACTTATTAGTTATTACT  
HQ219544 (A) CTGAACAATTA AAAAGAGTGGTTGCTACACATAGCAGACAAATACCTTTACAAGTTAACACACACTTATTAGTTATTACT  
HQ219542 (A) CTGAACAATTA AAAAGAGTGGTTGCTACACATAGCAGACAAATACCTTTACAAGTTAACACACACTTATTAGTTATTACT  
HQ219541 (A) CTGAACAATTA AAAAGAGTGGTTGCTACACATAGCAGACAAATACCTTTACAAGTTAACACACACTTATTAGTTATTACT  
HQ219540 (A) CTGAACAATTA AAAAGAGTGGTTGCTACACATAGCAGACAAATACCTTTACAAGTTAACACACACTTATTAGTTATTACT  
HQ219537 (A) CTGAATGATTA AAAAGAGTGGTTGCTACACCTAGCAGACAAATACCTTTACAAGTTAACACACACTTATTAGTTATTACT  
HQ219531 (A) CTGAACAATTA AAAAGAGTGGTTGCTACACATAGCAGACAAATACCTTTACAAGTTAACACACACTTATTAGTTATTACT  
HQ219547 (B) CTAACAATTA AAAATGCATGGTTGCTTCGCCTAACAGGCAATAACTTTACAATATAAC--ACAATTATTACTGTAATAT  
HQ219543 (B) CTAACGATTA AAAA-TGTGTGTTGCTACACCTAACAGGCAATAACTTTACAAGTTAACACACACTTATTACTGTAATAT  
HQ219539 (B) CTAACGATTA AAAA-TGTGTGTTGCTACACCTAACAGGCAATAACTTTACAATATAAC--ACAATTATTACTGTAATAT  
HQ219538 (B) CTAACAATTA AAAATGCATGGTTGCTTCGCCTAACAGGCAATAACTTTACAATATAAC--ACAATTATTACTGTAATAT  
HQ219536 (B) CTAATGATTA AAAATGCATGGTTGCTACACCTAACAGGCAATAACTTTACAATATAAC--ACAATTATTACTGTAATAT  
HQ219535 (B) CCAACGATTA AAAAAGCGTGGTTGCTACACCTAACAGGCAATAACTTTACAATATAAC--ACAATTATTACTGTAATAT  
HQ219534 (B) CCAACGATTA AAAAAGCGTGGTTGCTACACCTAACAGGCAATAACTTTACAATATAAC--ACAATTATTACTGTAATAT  
HT (TYPE A) CTGAACAATTA AAAAGAGTGGTTGCTACACATAGCAGACAAATACCTTTACAAGTTAACACACACTTATTAGTTATTACT  
specimen P CCAACGATTA AAAAAGCGTGGTTGCTACACCTAACAGGCAATAACTTTACAATATAAC--ACAATTATTACTGTAATAT  
specimen P\* CTAACGATTA AAAA-TGTGTGTTGCTACACCTAACAGGCAATAACTTTACAAGTTAACACACACTTATTACTGTAATAT  
specimen R CCAACGATTA AAAAAGCGTGGTTGCTACACCTAACAGGCAATAACTTTACAATATAAC--ACAATTATTACTGTAATAT  
specimen R\* CCAACGATTA AAAAAGCGTGGTTGCTACACCTAACAGGCAATAACTTTACAATATAAC--ACAATTATTACTGTAATAT



HQ219553 (A) TTTTATTGGGAATTAATAATTTAATTAATAATTTCTTTGAGGGGTTGTTTGGATATCATAAATGTTACCGGAAGGGAAGG  
 HQ219550 (A) TTTTATTAGGAATTATATTTTAATTAATAATTTCTTCGGGGGGTTGTTTGGATATCATAAATGTTACCGGAAGGGAAGG  
 HQ219549 (A) TTTTATTAGGAATTATATTTTAATTAATAATTTCTTCGGGGGGTTGTTTGGATATCATAAATGTTACCGGAAGGGAAGG  
 HQ219546 (A) TTTTATTAGGAATTATATTTTAATTAATAATTTCTTCGGGGGGTTGTTTGGATATCATAAATGTTACCGGAAGGGAAGG  
 HQ219545 (A) TTTTATTAGGAATTATATTTTAATTAATAATTTCTTCGGGGGGTTGTTTGGATATCATAAATGTTACCGGAAGGGAAGG  
 HQ219544 (A) TTTTATTAGGAATTATATTTTAATTAATAATTTCTTCGGGGGGTTGTTTGGATATCATAAATGTTACCGGAAGGGAAGG  
 HQ219542 (A) TTTTATTGGGAATTAATAATTTAATTAATAATTTCTTCGGGGGGTTGTTTGGATATCATAAATGTTACCGGAAGGGAAGG  
 HQ219541 (A) TTTTATTAGGAATTATATTTTAATTAATAATTTCTTCGGGGGGTTGTTTGGATATCATAAATGTTACCGGAAGGGAAGG  
 HQ219540 (A) TTTTATTAGGAATTATATTTTAATTAATAATTTCTTCGGGGGGTTGTTTGGATATCATAAATGTTACCGGAAGGGAAGG  
 HQ219537 (A) TTTTATTAGGAATTATATTTTAATTAATAATTTCTTCGGGGGGTTGTTTGGATATCATAAATGTTACCGGAAGGGAAGG  
 HQ219531 (A) TTTTATTAGGAATTATATTTTAATTAATAATTTCTTCGGGGGGTTGTTTGGATATCATAAATGTTACCGGAAGGGAAGG  
 HQ219547 (B) TTTTATTGGGAATTAATAATTTAATTAATAATTTCTTCGGGGGGTTGTTTGGATATCATAAATGTTACCGGAAGGGAAGG  
 HQ219543 (B) TTTTATTGGGAATTAATAATTTAATTAATAATTTCTTCGGGGGGTTGTTTGGATATCATAAATGTTACCGGAAGGGAAGT  
 HQ219539 (B) TTTTATTGGGAATTAATAATTTAATTAATAATTTCTTCGGGGGGTTGTTTGGATATCATAAATGTTACCGGAAGGGAAGG  
 HQ219538 (B) TTTTATTGGGAATTAATAATTTAATTAATAATTTCTTCGGGGGGTTGTTTGGATATCATAAATGTTACCGGAAGGGAAGG  
 HQ219536 (B) TTTTATTGGGAATTAATAATTTAATTAATAATTTCTTCGGGGGGTTGTTTGGATATCATAAATGTTACCGGAAGGGAAGG  
 HQ219535 (B) TTTTATTGGGAATTAATAATTTAATTAATAATTTCTTCGGGGGGTTGTTTGGATATCATAAATGTTACCGGAAGGGAAGG  
 HQ219534 (B) TTTTATTGGGAATTAATAATTTAATTAATAATTTCTTCGGGGGGTTGTTTGGATATCATAAATGTTACCGGAAGGGAAGT  
 HT (TYPE A) TTTTATTAGGAATTATATTTTAATTAATAATTTCTTCGGGGGGTTGTTTGGATATCATAAATGTTACCGGAAGGGAAGG  
 specimen P TTTTATTGGGAATTAATAATTTAATTAATAATTTCTTCGGGGGGTTGTTTGGATATCATAAATGTTACCGGAAGGGAAGG  
 specimen P\* TTTTATTGGGAATTAATAATTTAATTAATAATTTCTTCGGGGGGTTGTTTGGATATCATAAATGTTACCGGAAGGGAAGT  
 specimen R TTTTATTGGGAATTAATAATTTAATTAATAATTTCTTCGGGGGGTTGTTTGGATATCATAAATGTTACCGGAAGGGAAGG  
 specimen R\* TTTTATTGGGAATTAATAATTTAATTAATAATTTCTTCGGGGGGTTGTTTGGATATCATAAATGTTACCGGAAGGGAAGG

HQ219553 (A) TTTTATGACGTAATAAATAAGATGCTTTGTT-----ACAGA  
 HQ219550 (A) TTTTATGACGTAATCACTAAGGT-----GCAGA  
 HQ219549 (A) TTTTATGACGTAATAAATAAGAT-----ACAGA  
 HQ219546 (A) TTTTATGACGTAATAAATAAGAT-----ACAGA  
 HQ219545 (A) TTTTATGACGTAATAAATAAGAT-----ACAGA  
 HQ219544 (A) TTTTATGACGTAATAAATAAGAT-----ACAGA  
 HQ219542 (A) TTTTATGACGTAATAAATAAGATGCTTTGTT-----ACAGA  
 HQ219541 (A) TTTTATGACGTAATAAATAAGAT-----ACAGA  
 HQ219540 (A) TTTTATGACGTAATAAATAAGAT-----ACAGA  
 HQ219537 (A) TTTTATGACGTAATAAATAAGAT-----ACAGA  
 HQ219531 (A) TTTTATGACGTAATAAATAAGAT-----TACAGA  
 HQ219547 (B) TTTTATGACGTAATAAATAAGATGCTTTGTTTCGTCATACAGA  
 HQ219543 (B) TTTTATGACGTAATAAATAAGATGCTTTGTTTCGTCATACAGA  
 HQ219539 (B) TTTTATGACGTAATAAATAAGAGCTTTGTTTCGTCATACAGA  
 HQ219538 (B) TTTTATGACCTAATAAATAAGAGCTTTGTTTCGTCATACAGA  
 HQ219536 (B) TTTTATGACGTAATAAATAAGAGCTTTGTTTCGTCATACAGA  
 HQ219535 (B) TTTTATGACGTAATAAATAAGATGCTTTGTTTCGTCATACAGA  
 HQ219534 (B) TTTTATGACGTAATAAATAAGATGCTTTGTTTCGTCATACAGA  
 HT (TYPE A) TTTTATGACGTAATAAATAAGAT-----ACAGA  
 specimen P TTTTATGACGTAATAAATAAGATGCTTTGTTTCGTCATACAGA  
 specimen P\* TTTTATGACGTAATAAATAAGATGCTTTGTTTCGTCATACAGA  
 specimen R TTTTATGACGTAATAAATAAGATGCTTTGTTTCGTCATACAGA  
 specimen R\* TTTTATGACGTAATAAATAAGATGCTTTGTTTCGTCATACAGA









HQ219572 (A) ATTTTTTCTTGAATATCACGGCCAGTTTTTAACAAG-TTTTTTTCTAGCTTCTATTGAAATATTATACACAAC  
 HQ219569 (A) ATTTTTTCTTGAATATCACGGCCAGTTTTTAACAAG--TTTTTTCTAGCTTCTATTGAAATATTATACACAAC  
 HQ219568 (A) ATTTTTTCTTAAATATCACGGCCAGTTTTTAACAAG--TTATTTTCTAGCTTCTATTGAAATATTATACACAAC  
 HQ219567 (A) ATTTTTTCTTAAATATCACGGCCAGTTTTTAACAAG--TTATTTTCTAGCTTCTATTGAAATATTATACACAAC  
 HQ219564 (A) ATTTTTTCTTAAATATCACGGCCAGTTTTTAACAAG--TTATTTTCTAGCTTCTATTGAAATATTATACACAAC  
 HQ219563 (A) ATTTTTTCTTAAATATCACGGCCAGTTTTTAACAAG--TTATTTTCTAGCTTCTATTGAAATATTATACACAAC  
 HQ219561 (A) ATTTTTTCTTAAATATCACGGCCAGTTTTTAACAAG--TTATTTTCTAGCTTCTATTGAAATATTATACACAAC  
 HQ219555 (A) ATTTTTTCTTAAATATCACGGCCAGTTTTTAACAAG--TTATTTTCTAGCTTCTATTGAAATATTATACACAAC  
 HQ219554 (A) ATTTTTTCTTAAATATCACGGCCAGTTTTTAACAAG--TTATTTTCTAGCTTCTATTGAAATATTATACACAAC  
 HQ219575 (B) ATTTTT-TTCAAATATTACGACCAGTTTTTAACAAGTTTTATTTTCCAGCTTCTATTGAAATATCCCATACAAC  
 HQ219573 (B) ATTTTTTTTCAAATATCACGGCCAGTTTTTAACAAGTTTTATTTTCCAGCTTCTATTGAAATATCCCATACAAC  
 HQ219566 (B) ATTTTT-TTCAAATATCACGATCAGTTTTTAACAAGTTTTATTTTCCAGCTTCTATTGAAATATCCCATACAAC  
 HQ219562 (B) ATTTTT--TTAAA-TATCACGACCAGTTTTTAACAAG-TTTTTTTTCCAGCTTCTATTGAAATATCCCATACAAC  
 HQ219560 (B) ATTTTTTTTCAAATATCACGGCCAGTTTTTAACAAGTTTTATTTTCCAGCTTCTATTGAAATATCCCATACAAC  
 HQ219559 (B) ATTTTTTTCAAATGCCACTGCCAGTTTTTAACAAGTTTTATTTTCCAGCTTCTATTGAAATATCCCATACAAC  
 HQ219558 (B) ATTTTTTTCAAATGCCAGCCAGTTTTTAACAAGTTTTATTTTCCAGCTTCTATTGAAATATCCCATACAAC  
 HT (TYPE A) ATTTTTTCTTGAATATCACGGCCAGTTTTTAACAAG-TTTTTTTCTAGCTTCTATTGAAATATTATACACAAC  
 specimen P ATTTTT-TTCAAATATCACGATCAGTTTTTAACAAGTTTTATTTTCCAGCTTCTATTGAAATATCCCATACAAC  
 specimen R ATTTTTTTCAAATATCACGACCAGTTTTTAACAAGTTTTATTTTCCAGCTTCTATTGAAATATCCCATACAAC  
 specimen R\* ATTTTTTTCAAATATCACGACCAGTTTTTAACAAGTTTTATTTTCCAGCTTCTATTGAAATATCCCATACAAC

HQ219572 (A) GCTGCTGTAATTTCTGAGAAAGCTTTTGAATCGGATTACTTTTGAAGTACAAAAATGATGTTGTCGCTCCACCGTCA  
 HQ219569 (A) GCTGCTGTAATTTCTGAGAAAGCTTTTGAATCGGATTACTTTTGAAGTACAAAAATGATGTTGTCGCTCCACCGTCA  
 HQ219568 (A) GCTGCTGTAATTTCTGAGAAAGCTTTTGAATCGGATTACTTTTGAAGTACAAAAATGATGTTGTCGCTCCACCGTCA  
 HQ219567 (A) GCTGCTGTAATTTCTGAGAAAGCTTTTGAATCGGATTACTTTTGAAGTACAAAAATGATGTTGTCGCTCCACCGTCA  
 HQ219564 (A) GCTGCTGTAATTTCTGAGAAAGCTTTTGAATCGGATTACTTTTGAAGTACAAAAATGATGTTGTCGCTCCACCGTCA  
 HQ219563 (A) GCTGCTGTAATTTCTGAGAAAGCTTTTGAATCGGATTACTTTTGAAGTACAAAAATGATGTTGTCGCTCCACCGTCA  
 HQ219561 (A) GCTGCTGTAATTTCTGAGAAAGCTTTTGAATCGGATTACTTTTGAAGTACAAAAATGATGTTGTCGCTCCACCGTCA  
 HQ219555 (A) GCTGCTGTAATTTCTGAGAAAGCTTTTGAATCGGATTACTTTTGAAGTACAAAAATGATGTTGTCGCTCCACCGTCA  
 HQ219554 (A) GCTGCTGTAATTTCTGAGAAAGCTTTTGAATCGGATTACTTTTGAAGTACAAAAATGATGTTGTCGCTCCACCGTCA  
 HQ219575 (B) GCTGCTGTAATTTCTGAGAGAGCTTTTGAATCGGATTACTTTTGAAGTACAAAAATGATGTTGTCGCTCCACCATCA  
 HQ219573 (B) GCTGCTGTAATTTCTGAGAGAGCTTTTGAATCGGATTACTTTTGAAGTACAAAAATGATGTTGTCGCTCCACCGTCA  
 HQ219566 (B) ACTGCTGTAATTTCTGAGAGAGCTTTTGAATCGGATTACTTTTGAAGTACAAAAATGATGTTGTCGCTCCACCGTCA  
 HQ219562 (B) GCTGCTGTAATTTCTGAGAGAGCTTTTGAATCGGATTACTTTTGAAGTACAAAAATGATGTTGTCGCTCCACCGTCA  
 HQ219560 (B) GCTGCTGTAATTTCTGAGAGAGCTTTTGAATCGGATTACTTTTGAAGTACAAAAATGATGTTGTCGCTCCACCGTCA  
 HQ219559 (B) GCTGCTGTAATTTCTGAGAGAGCTTTTGAATCGGATTACTTTTGAAGTACAAAAATGATGTTGTCGCTCCACCGTCA  
 HQ219558 (B) GCTGCTGTAATTTCTGAGAGAGCTTTTGAATCGGATTACTTTTGAAGTACAAAAATGATGTTGTCGCTCCACCGTCA  
 HT (TYPE A) GCTGCTGTAATTTCTGAGAAAGCTTTTGAATCGGATTACTTTTGAAGTACAAAAATGATGTTGTCGCTCCACCGTCA  
 specimen P GCTGCTGTAATTTCTGAGAGAGCTTTTGAATCGGATTACTTTTGAAGTACAAAAATGATGTTGTCGCTCCACCGTCA  
 specimen R GCTGCTGTAATTTCTGAGAGAGCTTTTGAATCGGATTACTTTTGAAGTACAAAAATGATGTTGTCGCTCCACCGTCA  
 specimen R\* GCTGCTGTAATTTCTGAGAGAGCTTTTGAATCGGATTACTTTTGAAGTACAAAAATGATGTTGTCGCTCCACCGTCA

HQ219572 (A) AAGTACCAACCCCTCCAACAGTCTTATGCTACTGGTATGAACA  
 HQ219569 (A) AAGTACCAACCCCTCCAACAGTCTTATGCTACTGGTATGAACA  
 HQ219568 (A) AAGTACCAACCCCTCCAACAGTCTTATGCTACTGGTATGAACA  
 HQ219567 (A) AAGTACCAACCCCTCCAACAGTCTTATGCTACTGGTATGAACA  
 HQ219564 (A) AAGTACCAACCCCTCCAACAGTCTTATGCTACTGGTATGAACA  
 HQ219563 (A) AAGTACCAACCCCTCCAACAGTCTTATGCTACTGGTATGAACA  
 HQ219561 (A) AAGTACCAACCCCTCCAACAGTCTTATGCTACTGGTATGAACA  
 HQ219555 (A) AAGTACCAACCCCTCCAACAGTCTTATGCTACTGGTATGAACA  
 HQ219554 (A) AAGTACCAACCCCTCCAACAGTCTTATGCTACTGGTATGAACA  
 HQ219575 (B) AAGTACCAACCCCTCCAACAGTCTTATGCTACTGGTATGAACA  
 HQ219573 (B) AAGTACCAACCCCTCCAACAGTCTTATGCTACTGGTATGAACA  
 HQ219566 (B) AAGTACCAACCCCTCCAACAGTCTTATGCTACTGGTATGAACA  
 HQ219562 (B) AAGTATCAACCATTCCAACAGTCTTATGCTACTGGTATGAACA  
 HQ219560 (B) AAGTACCAACCCCTCCAACAGTCTTATGCTACTGGTATGAACA  
 HQ219559 (B) AAGTACCAACCCCTCCAACAGTCTTATGCTACTGGTATGAACA  
 HQ219558 (B) AAGTACCAACCATTCCAACAGTCTTATGCTACTGGTATGAACA  
 HT (TYPE A) AAGTACCAACCCCTCCAACAGTCTTATGCTACTGGTATGAACA  
 specimen P AAGTATCAACCATTCCAACAGTCTTATGCTACTGGTATGAACA  
 specimen R AAGTACCAACCCCTCCAACAGTCTTATGCTACTGGTATGAACA  
 specimen R\* AAGTACCAACCCCTCCAACAGTCTTATGCTACTGGTATGAACA



HQ219601 (A) TGACGTATTTCTCAG-----TGTGTTTTAA-----CCATCTCATTTTCAATGCAGCCAGATTGTGAGGAAGGGAAT  
 HQ219599 (A) TGACGTATTTTTCAG-----TGTGTTTTAA-----CCATCTCATTTTCAATGCAGCCAGATTGTGAGGAAGGGAAT  
 HQ219592 (A) TGACGTATTTTTCAG-----TGTGTTTTAA-----CCATCTCATTTTCAATGCAGCCAGATTGTGAGGAAGGGAAT  
 HQ219590 (A) TGACGTATTTTCTCAG-----TGTGTTTTAA-----CCATCTCATTTTCAATGCAGCCAGATTGTGAGGAAGGGAAT  
 HQ219587 (A) TGACGTATTTTCTCAG-----TATGTTTTAA-----CCATCTCATTTTCAATGCAGCCAGATTGTGAGGAAGGGAAT  
 HQ219585 (A) TGACGTATTTTTCAG-----TGTGTTTTAA-----CCATCTCATTTTCAATGCAGCCAGATTGTGAGGAAGGGAAT  
 HQ219584 (A) TGACGTATTTTTCAG-----TGTGTTTTAA-----CCATCTCATTTTCAATGCAGCCAGATTGTGAGGAAGGGAAT  
 HQ219582 (A) TGACGTATTTTTCAG-----TGTGTTTTAA-----CCATCTCATTTTCAATGCAGCCAGATTGTGAGGAAGGGAAT  
 HQ219607 (B) TGATGTATTTCTCAATTTGAATGTATTTAAGTTTTTAACCATCTCATTTTCAATGCAGCCAGATTGTGAGGAAGGGAAT  
 HQ219602 (B) TGACGTATTTCTCAATTTAATGTATTTTAA-----CCATCTCATTTTCAATGCAGCCAGATTGTGAGGAAGGGAAT  
 HQ219600 (B) TGACGTATTTCTAATTTAAGGTATTT-AA-----CCATCTCATTTTCAATGCAGCCAGATTGTGAGGAAGGGAAT  
 HQ219596 (B) TGACGTTTTTCTAATTTGAATGTATTT-AA-----CCATCTCATTTTCAATGCAGCCAGATTGTGAGGAAGGGAAT  
 HQ219591 (B) TGTCGTATTTCTCAATTTGAATGTATTTTAA-----CCATCTCATTTTCAATGCAGCCAGATTGTGAGGAAGGGAAT  
 HQ219589 (B) TGACGTTTTTCTAATTTGAATGTATTT-AA-----CCATCTCATTTTCAATGCAGCCAGATTGTGAGGAAGGGAAT  
 HQ219583 (B) TGACGTTTTTCTAATTTGAATGTATTT-AA-----CCATCTCATTTTCAATGCAGCCAGATTGTGAGGAAGGGAAT  
 HQ219581 (B) TGATGTATTTCTCAATTTGAATGTATTTTAA-----CCATCTCATTTTCAATGCAGCCAGATTGTGAGGAAGGGAAT  
 HQ219578 (B) TGACGTATTTCTCAATTTGAATGTATTTTAA-----CCATCTCATTTTCAATGCAGCCAGATTGTGAGGAAGGGAAT  
 HT (TYPE A) TGACGTATTTCTCAG-----TGTGTTTTAA-----CCATCTCATTTTCAATGCAGCCAGATTGTGAGGAAGGGAAT  
 Specimen P TGTCGTATTTCTCAATTTGAATGTATTTTAA-----CCATCTCATTTTCAATGCAGCCAGATTGTGAGGAAGGGAAT  
 Specimen R\* TGTCGTATTTCTCAATTTGAATGTATTTTAA-----CCATCTCATTTTCAATGCAGCCAGATTGTGAGGAAGGGAAT  
 Specimen R\* TGATGTATTTCTCAATTTGAATGTATTTAAGTTTTTAACCATCTCATTTTCAATGCAGCCAGATTGTGAGGAAGGGAAT

HQ219601 (A) GAAATGGTTTTCTGTGATGGGTGTAACCTATGTGTTCCACCAAGCTTGTATGGGATTTTGAAGGTCAGTGTATCAGTTA  
 HQ219599 (A) GAAATGGTTTTCTGTGATGGGTGTAACCTATGTGTTCCACCAAGCTTGTATGGGATTTTGAAGGTCAGTGTATCAGTTA  
 HQ219592 (A) GAAATGGTTTTCTGTGATGGGTGTAACCTATGTGTTCCACCAAGCTTGTATGGGATTTTGAAGGTCAGTGTATCAGTTA  
 HQ219590 (A) GAAATGGTTTTCTGTGATGGGTGTAACCTATGTGTTCCACCAAGCTTGTATGGGATTTTGAAGGTCAGTGTATCAGTTA  
 HQ219587 (A) GAAATGGTTTTCTGTGATGGGTGTAACCTATGTGTTCCACCAAGCTTGTATGGGATTTTGAAGGTCAGTGTATCAGTTA  
 HQ219585 (A) GAAATGGTTTTCTGTGATGGGTGTAACCTATGTGTTCCACCAAGCTTGTATGGGATTTTGAAGGTCAGTGTATCAGTTA  
 HQ219584 (A) GAAATGGTTTTCTGTGATGGGTGTAACCTATGTGTTCCACCAAGCTTGTATGGGATTTTGAAGGTCAGTGTATCAGTTA  
 HQ219582 (A) GAAATGGTTTTCTGTGATGGGTGTAACCTATGTGTTCCACCAAGCTTGTATGGGATTTTGAAGGTCAGTGTATCAGTTA  
 HQ219607 (B) GAAATGGTTTTCTGTGATGGATGTAACCTATGTGTGCACCAAGCTTGTATGGAATTTTGAAGGTCAGTGTATCTCTTA  
 HQ219602 (B) GAAATGGTTTTCTGTGATGGATGTAACCTATGTGTGCACCAAGCTTGTATGGAATTTTGAAGGTCAGTGTATCAGTTA  
 HQ219600 (B) GAAATGGTTTTCTGTGATGGATGTAACCTATGTGTGCACCAAGCTTGTATGGAATTTTGAAGGTCAGTGTATCAGTTA  
 HQ219596 (B) GAAATGGTTTTCTGTGATGGATGTAACCTATGTGTGCACCAAGCTTGTATGGAATTTTAAAGGTCAGTGTATCTGTTA  
 HQ219591 (B) GAAATGGTTTTCTGTGATGGATGTAACCTATGTGTGCACCAAGCTTGTATGGAATTTTAAAGGTCAGTGTATCTCTTA  
 HQ219589 (B) GAAATGGTTTTCTGTGATGGATGTAACCTATGTGTGCACCAAGCTTGTATGGAATTTTAAAGGTCAGTGTATCTCTTA  
 HQ219583 (B) GAAATGGTTTTCTGTGATGGATGTAACCTATGTGTGCACCAAGCTTGTATGGAATTTTAAAGGTCAGTGTATCTGTTA  
 HQ219581 (B) GAAATGGTTTTCTGTGATGGATGTAACCTATGTGTGCACCAAGCTTGTATGGAATTTTAAAGGTCAGTGTATCTCTTA  
 HQ219578 (B) GAAATGGTTTTCTGTGATGGATGTAACCTATGTGTGCACCAAGCTTGTATGGAATTTTAAAGGTCAGTGTATCTCTTA  
 HT (TYPE A) GAAATGGTTTTCTGTGATGGGTGTAACCTATGTGTTCCACCAAGCTTGTATGGGATTTTGAAGGTCAGTGTATCAGTTA  
 Specimen P GAAATGGTTTTCTGTGATGGATGTAACCTATGTGTGCACCAAGCTTGTATGGAATTTTAAAGGTCAGTGTATCTCTTA  
 Specimen R\* GAAATGGTTTTCTGTGATGGATGTAACCTATGTGTGCACCAAGCTTGTATGGAATTTTAAAGGTCAGTGTATCTCTTA  
 Specimen R\* GAAATGGTTTTCTGTGATGGATGTAACCTATGTGTGCACCAAGCTTGTATGGAATTTTAAAGGTCAGTGTATCTCTTA

HQ219601 (A) TGCT-----ATAACAAACATAATCAAAAAATGTTTTATGCAGCTTTTTATAATGAATTCGTTACACACATT  
 HQ219599 (A) TACT-----ATAACAAACATAATCAAAAAATGTTTTATGCAGCTTTTTATAATGAATTCAGTACACACATT  
 HQ219592 (A) TACT-----ATAACAAACATAATCAAAAAATGTTTTATGCAGCTTTTTATAATGAATTCAGTACACACATT  
 HQ219590 (A) TGCT-----ACAACAAACATAATCAAAAAATGTTTTATGCAGCTTTTTATAATGAATTCCTTACACACATT  
 HQ219587 (A) TACT-----ATAACAAACATAATCAAAAAATGTTTTATGCAGCTTTTTATAATGAATTCGGTACACACATT  
 HQ219585 (A) TACT-----ATAACAAACATAATCAAAAAATGTTTTATGCAGCTTTTTATAATGAATTCAGTACACACATT  
 HQ219584 (A) TACT-----ATAACAAACATAATCAAAAAATGTTTTATGCAGCTTTTTATAATGAATTCAGTACACACATT  
 HQ219582 (A) TACT-----ATAACAAACATAATCAAAAAATGTTTTATGCAGCTTTTTATAATGAATTCAGTACACACATT  
 HQ219607 (B) TGCTTCTTGTATGCT--ATATCAAACATAATCAAAAAAGTGTATGCAGCTTTTTATAATGAATTCGATACACACA--  
 HQ219602 (B) TGCTTCTTGTATGCT--ATATCAAACATAATCAAAAAAGTGTATGCAGCTTTTTATAATGAATTCGATACACACA--  
 HQ219600 (B) TGCTTCTTGTATGCT--ATATCAAACATAATCAGAAAATGTTTTATGCAGCTTTTTATAATGAATTCGATACACACACA  
 HQ219596 (B) TGCT-----TATTTCTAATATCAAAACAAAATCAAAAAAGTGTATGCAGCTTTTTATAATGAATTCGATACACACA--  
 HQ219591 (B) TGCTTCTTGTATGCT--ATATCAAACATAATCAAAAAATGTTTTATGCAGCTTTTTATAATGAATTCGATACACACA--  
 HQ219589 (B) TGCT-----TATTTCTAATATCAAAACAAAATCAAAAAAGTGTATGCAGCTTTTTATAATGAATTCGATACACACA--  
 HQ219583 (B) TGCT-----TATTTCTAATATCAAAACAAAATCAAAAAAGTGTATGCAGCTTTTTATAATGAATTCGATACACACA--  
 HQ219581 (B) TGCTTCTTGTATGCT--ATATCAAACATAATCAAAAAATGTTTTATGCAGCTTTTTATAATGAATTCGATACACACA--  
 HQ219578 (B) TGCTTATTTATA-----ATATCAAACAAAATCAAAAAAGTGTATGCAGCTTTTTATAATGAATTCGATACACACATT  
 HT (TYPE A) TGCT-----ACAACAAACATAATCAAAAAATGTTTTATGCAGCTTTTTATAATGAATTCGGTACACGCATT  
 Specimen P TGCTTCTTGTATGCT--ATATCAAACATAATCAAAAAATGTTTTATGCAGCTTTTTATAATGAATTCGATACACACA--  
 Specimen R\* TGCTTCTTGTATGCT--ATATCAAACATAATCAAAAAATGTTTTATGCAGCTTTTTATAATGAATTCGATACACACA--  
 Specimen R\* TGCT-----TATTTATAATATCAAAACAAAATCAAAAAAGTGTATGCAGCTTTTTATAATGAATTCGATACACACATT

HQ219601 (A) ATTTCTTTTAAATATTT----TAGTATAACGCACCT----GGGACGAAAACTTTTCGCAGATCTGCTGATTTTCAGAA  
 HQ219599 (A) ATTTCTTTTAAATATTT----TAGTATAACGCACCT----GGGACGAAAACTTCCCGGGATCA-----  
 HQ219592 (A) ATTTCTTTTAAATATTT----TAGTATAACGCACCT----GGGACGAAAACTTCCCGGGATCA-----  
 HQ219590 (A) ATTTCTTTTAAAGTATTT----TAGTATAACCCACCTGGCATGGGACAAAAATCTTTTCGCAGATCTGCTGATTTTCAGAA  
 HQ219587 (A) ATTTTAAAAAATATTT----TAGTATAACGCACCT----GGGACGAAAACTTCCCGGGATCTGCTGATTTTCAGAA  
 HQ219585 (A) ATTTCTTTTAAATATTT----TAGTATAACGCACCT----GGGACGAAAACTTCCCGGGATCA-----  
 HQ219584 (A) ATTTCTTTTAAATATTT----TAGTATAACGCACCT----GGGACGAAAACTTCCCGGGATCA-----  
 HQ219582 (A) ATTTCTTTTAAATATTT----TAGTATAACGCACCT----GGGACGAAAACTTCCCGGGATCA-----  
 HQ219607 (B) --ATTTTCT-TTTTGGTTTTCTTAGTATTACACACCTTAGATTGTGCAAAAGTACTATTTTGCAA-AAAAATTGCTAG  
 HQ219602 (B) ----TTTTCTTTTTGGTTATCTTAGTATTACACACCTTAGATTGTGCAAAAGTACTATTTTGCAA-AAAAATTGCTAG  
 HQ219600 (B) TT--TTTTCTTTTTGGGTTATCGTAGTATTACACACCTTAGATTGTGCAAAAGTACTATTTTGCAA-AAAAATTGCTAG  
 HQ219596 (B) --TTTTTCTTTTTGGGTTATCTTAGTATTACACACCTTAGATTGTGCAAAAGTACTATTTTGCAA--AAAAATTGCTAG  
 HQ219591 (B) --AATTCCTTTTTGGTTTTCTTAGTATTACACACCTTAGATTGTGCAAAAGTACTATTTTGCAA-AAAAATTGCTAG  
 HQ219589 (B) --TTTTTCTTTTTGGGTTATCTTAGTATTACACACCTTAGATTGTGCAAAAGTACTATTTTGCAA--AAAAATTGCTAG  
 HQ219583 (B) --TTTTTCTTTTTGGGTTATCTTAGTATTACACACCTTAGATTGTGCAAAAGTACTATTTTGCAA--AAAAATTGCTAG  
 HQ219581 (B) --AATTCCTTTTTGGTTTTCTTAGTATTACACACCTTAGATTGTGCAAAAGTACTATTTTGCAA-AAAAATTGCTAG  
 HQ219578 (A) GATTTTCTCTTTTTGGGTTATCTTAGTATTACACACCTTAGATTGTGCAAAAGTACTATTTTGCAA-AAAAATTGCTAG  
 HT (TYPE A) AAAAATAT-----TT----TAGTATAAC----GCACCTGGGACAAAAATCTTCCCGGGATCTGCTGATTTTCAGAA  
 specimen P ----TTTTTCTCTTTTTGGTTATCTTAGTATTACACTCTTAGATTGTGCATAAGTACTATTTTGCAA-AAAAATTGCTAG  
 Specimen R\* --AATTCCTTTTTGGTTTTCTTAGTATTACACACCTTAGATTGTGCAAAAGTACTATTTTGCAA-AAAAATTGCTAG  
 Specimen R\* ----TTTTTCTTTTTGGTTATCTTAGTATTACACACCTTAGATTGTGCAAAAGTACTATTTTGCAA-AAAAATTGCTAG

HQ219601 (A) CCTTTTTTGTGTTAAAAAGGTCA-----TCGTATAGACTTGT-----  
 HQ219599 (A) -----GGTCA-----TCGTATAGACTTAT-----  
 HQ219592 (A) -----GGTCA-----TCGTATAGACTTAT-----  
 HQ219590 (A) CCTTTTTTGTGTTAAAAAGGTCA-----TCGTATAGACTTGT-----  
 HQ219587 (A) CCTTTTTTGTGTTAAAAAGGTCA-----TCGTATAGACTTGT-----  
 HQ219585 (A) -----GGTCA-----TCGTATAGACTTAT-----  
 HQ219584 (A) -----GGTCA-----TCGTATAGACTTAT-----  
 HQ219582 (A) -----GGTCA-----TCGTATAGACTTAT-----  
 HQ219607 (B) CTCGTATTGTGTGCACAATTAACAATAATGTGCCAGCCTGTTTATTAATTCGCATACAGTTACATGGCAACGTTACCAAAAAG  
 HQ219602 (B) CTCGTATTGTGTGCACAAA--TACAATAATGTGCCAGCCTGTTTATTAATTCGCATATAGTTACATGGCAACGTTACCAAAAAG  
 HQ219600 (B) CCGGTATTGTGTGCACAATTAACAATAATGTGCCAGCCTGTTTATTAATTCGCATATAGTTACATGGCAACGTTACCAAAAAG  
 HQ219596 (B) CTCGTATTGTGTGCACAATTAACAATAATGTGCCATCCTGTTTATTAATTCGCATATAGTTACATGGCAACGTTACCAAAAAG  
 HQ219591 (B) CTCGTATTGTGTGCACAATTAACAATAATGTGCCATCCTGTTTATTAATTCGCATATAGTTACATGGCAACGTTACCAAAAAG  
 HQ219589 (B) CTCGTATTGTGTGCACAATTAACAATAATGTGCCATCCTGTTTATTAATTCGCATATAGTTACATGGCAACGTTACCAAAAAG  
 HQ219583 (B) CTCGTATTGTGTGCACAATTAACAATAATGTGCCATCCTGTTTATTAATTCGCATATAGTTACATGGCAACGTTACCAAAAAG  
 HQ219581 (B) CTCGTATTGTGTGCACAATTAACAATAATGTGCCATCCTGTTTATTAATTCGCATATAGTTACATGGCAACGTTACCAAAAAG  
 HQ219578 (B) CTCGTATTGTGTGCACAATTAACAATAATGTGCCAGCCTGTTTATTAATTCGCATATAGTTACATGGCAACGTTACCAAAAAG  
 HT (TYPE A) CCTTTTTTGTGTTAAAAAGGTCA-----TCGTATAGACTTGT-----  
 specimen P CTCGTATTGTGTGCACAATTAACAATAATGTGCCAGCCTGTTTATTAATTCGCATATAGTTACATAGCACTGTTACCAAAAAG  
 Specimen R\* CTCGTATTGTGTGCACAATTAACAATAATGTGCCATCCTGTTTATTAATTCGCATATAGTTACATGGCAACGTTACCAAAAAG  
 Specimen R\* CTCGTATTGTGTGCACAATTAACAATAATGTGCCATCCTGTTTATTAATTCGCATATAGTTATATGGCAACGTTACCAAAAAG

HQ219601 (A) -----  
 HQ219599 (A) -----  
 HQ219592 (A) -----  
 HQ219590 (A) -----  
 HQ219587 (A) -----  
 HQ219585 (A) -----  
 HQ219584 (A) -----  
 HQ219582 (A) -----  
 HQ219607 (B) TAATGCTTACAATAGGTATGA-AATCTTCCGTTGGATGCTCTGATTTCCGAACCTTTTTT-----  
 HQ219602 (B) TAATGCTTACAGTAGGTATGA-GATCTTCCGCGGATGCTCTGATTTCCGAACCTTCTTCTGTTAAAAAGGCTCTCGTCGT  
 HQ219600 (B) TAATCTTACAGCAGGGATGAGAATCGTATCGCGGATGCGCTAATTTCCGAACCTTCTTCTGTTAAAAAGGCTCTCGTCGT  
 HQ219596 (B) TAATCTTACAGCAGGGATGAGAATCGTCCCGGATGCGCTAATTTCCGAATCTTCTTCTGTTAAAAAGGCTCTCGTCGT  
 HQ219591 (B) TAATGCTTACAACAGGCATGAGAATCTTCCGTGAATGCTCTGATTTCTGAACCTTCTTCTGTTAAAAAGGCTCTCGTCGT  
 HQ219589 (B) TAATCTTACAGCAGGGATGAGAATCGTCCCGGATGCGCTAATTTCCGAATCTTCTTCTGTTAAAAAGGCTCTCGTCGT  
 HQ219583 (B) TAATCTTACAGCAGGGATGAGAATCGTCCCGGATGCGCTAATTTCCGAATCTTCTTCTGTTAAAAAGGCTCTCGTCGT  
 HQ219581 (B) TAATGCTTACAACAGGCATGAGAATCTTCCGTGAATGCTCTGATTTCTGAACCTTCTTCTGTTAAAAAGGCTCTCGTCGT  
 HQ219578 (B) TAATCTTACAATAGGTATGAGAATCGTCCCGGATGCGCTAATTTCCGAACCTTCTTCTGTTAAAAAGGCTCTCGTCGT  
 HT (TYPE A) -----  
 specimen P TAATCTTACAGCAGGAATGAGAATCGTCCCGGATGCGCTAATTTCCGAACCTTCTTCTGTTAAAAAGGCTCTCGTCGT  
 Specimen R\* TAATCTTACAGCAGGGATGAGAATCGTCCCGGATGCGCTAATTTCCGAACCTTCTTCTGTTAAAAAGGCTCTCGTCGT  
 Specimen R\* TAATCTTACAGCAGGGATGAGAATCGTCCCGGATGCGCTAATTTCCGAATCTTCTTCTGTTAAAAAGGCTCTCGTCGT

HQ219601 (A) ATTTTAGCCTTTACACATGTTGTAGTTTAACTTTTACATGCATCGTACTTAACGCCCC-AAGACCCCGAGGACAAACATT  
HQ219599 (A) ATTTTAGCCTTTACACATGTTGTGTTTAGCCTTTACATGCATCGTACTTAACGCCCC-AAGACCCCGAGGACAAACATT  
HQ219592 (A) ATTTTAGCCTTTACACATGTTGTGTTTAGCCTTTACATGCATCGTACTTAACGCCCC-AGACCCCGAGGACAAACATT  
HQ219590 (A) ATTTTAGCCTTTACACATGTTGTGTTTAACTTTTACATGCATCGTACTTAACGCCCC-AAGACCCCGAGGACAAACATT  
HQ219587 (A) ATTTTAGCCT-----TTACATGCATCGTACTTAACGCCCC-AAGACCCCGAGGACAAACATT  
HQ219585 (A) ATTTTAGCCTTTACACATGTTGTGTTTAGCCTTTACATGCATCGTACTTAACGCCCC-AAGACCCCGAGGACAAACATT  
HQ219584 (A) ATTTTAGCCTTTACACATGTTGTGTTTAGCCTTTACATGCATCGTACTTAACGCCCC-AAGACCCCGAGGACAAACATT  
HQ219582 (A) ATTTTAGCCTTTACACATGTTGTGTTTAGCCTTTACATGCATCGTACTTAACGCCCC-AAGACCCCGAGGACAAACATT  
HQ219607 (B) -----TACGCGCACCGTATTTAACGCCCCCAGACCCC-GCTACAAACATT  
HQ219602 (B) ATTTTAGCCTATAGAGCCTACG-----TGATCGTATTTAACGCCCCCAGACCCC-GCTACAAACATT  
HQ219600 (B) ATTTTA-----GCCTTTCATGCGTCGTATTTAACACCCCCAAGATTCCTCGCTACAAACATT  
HQ219596 (B) ATTTTAGCCTTCACATAAGTTGTAGTTTAGCCTTTATGTGCGTCGTATTTAACGCCCC-AGACCCCGCTACAAACATT  
HQ219591 (B) ATTTTAGCCTTCACATACGTTGAAGTTTAGCCTTTACGTGGGTCGTATTTAACACCCCCAAGATTCCTCGCTACAAACATT  
HQ219589 (B) ATTTTAGCCTTCACATAAGTTGTAGTTTAGCCTTTATGTGCGTCGTATTTAACGCCCC-AGACCCCGCTACAAACATT  
HQ219583 (B) ATTTTAGCCTTCACATAAGTTGTAGTTTAGCCTTTATGTGCGTCGTATTTAACGCCCC-AGACCCCGCTACAAACATT  
HQ219581 (B) ATTTTAGCCTTCACATACGTTGAAGTTTAGCCTTTACGTGGGTCGTATTTAACGCCCC-----CCCTACAAACATT  
HQ219578 (B) ATTTTAGCCTTCACATACGTTGTAGTTTAGCCT--TTCATGCGTCGTATTTAACACCCCCAAGATTCCTCGCTACAAACATT  
HT (TYPE A) ATTTTAGCCTTTACATATGTTGTAGTTTAACTTTTACATGCATCGTACTTAACGCCCC-AAGACCCCGAGGACAAACATT  
specimen P ATTTTAGT-----TAGCCTTTTCATGCGTCGTATTTAACACCCCCAAGATTCCTCGCTACAAACATT  
Specimen R\* ATTTTAGCCTTCACATACGTTGTAGTTTAGCCTTT-CATGCGTCGTATTTAACACCCCCAAGATTCCTCGCTACAAACATT  
Specimen R\* ATTTTAGCCTTCACATACTGTAGTT--TAGCCTTTTCATGCGTCGTATTTAACACCCCCAAGATTCCTCGCTACAAACATT

HQ219601 (A) TTGAGGAATTTTGATCAAACCTCTGTTCTCATCCTTGTACAAAATATCAGCATGCTCACTGATGACA  
HQ219599 (A) TTGAGGAATTTTGATC----TCTATTCTCATCCTTGTAAACAAAATATCAGCATGCTCACTGATGACA  
HQ219592 (A) TTGAGGAATTTTGATC----TCTATTCTCATCCTTGTAAACAAAATATCAGCATGCTCACCAGATGACA  
HQ219590 (A) TTGAGGAATTTTGATCAC--TCTGTTCTCATCCTTGTACAAAATATCAGCATGCTCACTGATGACA  
HQ219587 (A) TTGAGGAATTTTGATC----TCTATTCTCATCCTTGTACAAAATATCAGCATGCTCACTGATGACA  
HQ219585 (A) TTGAGGAATTTTGATC----TCTATTCTCATCCTTGTAAACAAAATATCAGCATGCTCACCAGATGACA  
HQ219584 (A) TTGAGGAATTTTGATC----TCTATTCTCATCCTTGTAAACAAAATATCAGCATGCACACAGATATCA  
HQ219582 (A) TTGAGGAATTTTGATC----TCTATTCTCATCCTTGTAAACAAAATATCAGCATGCTCACCAGATGACA  
HQ219607 (B) TTCAGAAATTTTGAACAAACTCAATTCCTCATCTCTGTTACAAAATCATTAGCATTACACAGATATCA  
HQ219602 (B) TTCAGAAATTTTGAATAAACTCAATTCCTCATCTCTGTTACAAAATCATTAGCATTACACAGATRTCA  
HQ219600 (B) TTCAGAAATTTTAAATAAACTCAATTCCTCATCCCTGTTACAAAATCATTAGCATTACACAGATATCA  
HQ219596 (B) TTCAGAAATTTTGAACAAACTCAATTCCTTATCTCTGTTACAAAATCATTAGCATTACACAGATATCA  
HQ219591 (B) TTCAGAAATTTTGAATAAACTCAATTCCTATCCCTGTTACAAAATCATTAGCATTACACAGATATCA  
HQ219589 (B) TTCAGAAATTTTGAACAAACTCAATTCCTATCTCTGTTATAAAAATCATTAGCATTACACAGATATCA  
HQ219583 (B) TTCAGAAATTTTGAACAAACTCAATTCCTTATCTCTGTTACAAAATCATTAGCATTACACAGATATCA  
HQ219581 (B) TTCAGAAATTTTGAATAAACTCAATTCCTATCCCTGTTACAAAATCATGAGCATCCACACAGATATCA  
HQ219578 (B) TTCAGAAATTTTGAACAAACTCAATTCCTATCCCTGTT-CAAAATCATTAGCAATCACACAGATATCA  
HT (TYPE A) TTGAGGAATTTTGATC----TCTATTCTCATCCTTGTACAAAATATCAGCATGCTCACTGATGACA  
specimen P TTCAGAAATTTTGAATAAACTCAATTCCTATCCCTGTTACAAAATCATTAGCATTACACAGATATCA  
Specimen R\* TTCAGAAATTTTGAACAAACTCCATTTATCATCCCTGTTACAAAATCATTAGCATTACACAGATATCA  
Specimen R\* TTCAGAAATTTTGAACAAACTCAATTCCTATCCCTGTTACAAAATATCATTAGCATTACACAGATATTA











HQ219504 (A) CGCTTGGCCTCGCTCTAGCATTTA  
HQ219500 (A) CGCTTGGCCTCGCTCTAGCATTTA  
HQ219499 (A) CGCTTGGCCTCGCTCTAGCATTTA  
HQ219498 (A) CGCTTGGCCTCGCTCTAGCATTTA  
HQ219496 (A) CGCTTGGCCTCGCTCTAGCATTTA  
HQ219495 (A) CGCTTGGCCTCGCTCTAGCATTTA  
HQ219494 (A) CGCTTGGCCTCGCTCTAGCATTTA  
HQ219492 (A) CGCTTGGCCTCGCTCTAGCATTTA  
HQ219491 (A) CGCTTGGCCTCGCTCTAGCATTTA  
HQ219489 (A) CGCTTGGCCTCGCTCTAGCATTTA  
HQ219488 (A) CGCTTGGCCTCGCTCTAGCATTTA  
HQ219485 (A) CGCTTGGCCTCGCTCTCGCATTTA  
HQ219480 (A) CGCTTGGCCTCGCTCTAGCATTTA  
HQ219479 (A) CGCTTGGCCTCGCTCTAGCATTTA  
HQ219501 (B) CGCTTGGCCTCGCTCTCGCATTTA  
HQ219497 (B) CGCTTGGCCTCGCTCTCGCATTTA  
HQ219493 (B) CGCTTGGCCTCGCTCTCGCATTTA  
HQ219490 (B) CGCTTGGCCTCGCTCTCGCATTTA  
HQ219487 (B) CGCTTGGCCTCGCTCTCGCATTTA  
HQ219486 (B) CGCTTGGCCTCGCTCTCGCATTTA  
HQ219484 (B) CGCTTGGCCTCGCTCTCGCATTTA  
HQ219483 (B) CGCTTGGCCTCGCTCTCGCATTTA  
HQ219482 (B) CGCTTGGCCTCGCTCTCGCATTTA  
HT (TYPE A) CGCTTGGCCTCGCTCTAGCATTTA  
specimen P CGCTTGGCCTCGCTCTCGCATTTA  
specimen R CGCTTGGCCTCGCTCTCGCATTTA  
specimen R\* CGCTTGGCCTCGCTCTCGCATTTA









HQ219653 (A) CCGACGCCGGGTTGAAATTATAATATATAAAGGTCCTACTGGGTGGCAAGGGGTGTGAGGTCGTTTATAGTTTTGAAATC  
 HQ219650 (A) CCGACGCCGGGTTGAAATTATAATATATAAAGGTCCTACTGGGTGGCAAGGGGTGTGAGGTCATTTATAGTTTTGAAATC  
 HQ219649 (A) CCGACGCCGGGTTGAAATTATAATATATAAAGGTCCTACTGGGTGGCAAGGGGTGTGAGGTCATTTATAGTTTTGAAATC  
 HQ219646 (A) CCGACGCCGGGTTGAAATTATAATATATAAAGGTCCTACTGGGTGGCAAGGGGTGTGAGGTCATTTATAGTTTTGAAATC  
 HQ219645 (A) CCGACGCCGGGTTGAAATTATAATATATAAAGGTCCTACTGGGTGGCAAGGGGTGTGAGGTCGTTTATAGTTTTGAAATC  
 HQ219644 (A) CCGACGCCGGGTTGAAATTATAATATATAAAGGTCCTACTGGGTGGCAAGGGGTGTGAGGTCGTTTATAGTTTTGAAATC  
 HQ219642 (A) CCGACGCCGGGTTGAAATTATAATATATAAAGGTCCTACTGGGTGGCAAGGGGTGTGAGGTCGTTTATAGTTTTGAAATC  
 HQ219641 (A) CCGACGCCGGGTTGAAATTATAATATATAAAGGTCCTACTGGGTGGCAAGGGGTGTGAGGTCGTTTATAGTTTTGAAATC  
 HQ219637 (A) CCGACGCCGGGTTGAAATTATAATATATAAAGGTCCTACTGGGTGGCAAGGGGTGTGAGGTCATTTATAGTTTTGAAATC  
 HQ219630 (A) CTGACGCCGGGTTGAAATTATAATATATAAAGGTCCTACTGGGTGGCAAGGGGTGTGAGGTCATTTATAGTTTTGAAATC  
 HQ219629 (A) CCGACGCCGGGTTGAAATTATAATATATAAAGGTCCTACTGGGTGGCAAGGGGTGTGAGGTCATTTATAGTTTTGAAATC  
 HQ219651 (B) CCGACGCCGGGTTGAAATTATAATATATAAAGGTCCTACTGGGTGGTAAGGGGTATTGGGTCATTTATAGTTTTGAAATC  
 HQ219647 (B) CCGACGCCGGGTTGAAATTATAATATATAAAGGTCCTACTGGGTGGCAAGGGGTGTGGGTCATTTATAGTTTTGAAATC  
 HQ219643 (B) CCGACGCCGGGTTGAAATTATAATATATAAAGGTCCTACTGGGTGGCAAGGGGTGTGAGGTCATTTATAGTTTTGAAATC  
 HQ219635 (B) CCGACGCCGGGTTGAAATTATAATATATAAAGGTCCTACTGGGTGGCAAGGGGTATGGGTCATTTATAGTTTTGAAATC  
 HQ219634 (B) CCGACGCCGGGTTGAAATTATATATATAAAGGTCCTACTGGGTGGTAAGGGGTGTGAGGTCATTTATAGTTTTGAAATC  
 HQ219633 (B) CCGACGCCGGGTTGAAATTATAATATATAAAGGTCCTACTGGGTGGCAAGGGGTGCGAGGTCATTTATAGTTTTGAAATC  
 HQ219631 (B) CCGACGCCGGGTTGAAATTATAATATATAAAGGTCCTACTGGGTGGCAAGGGGTGTGAGGTCATTTATAGTTTTGAAATC  
 HT (TYPE A) CCGACGCCGGGTTGAAATTATAATATATAAAGGTCCTACTGGGTGGCAAGGGGTGTGAGGTCATTTATAGTTTTGAAATC  
 specimen P CCGACGCCGGGTTGAAATTATAATATATAAAGGTCCTACTGGGTGGCAAGGGGTGTGAGGTCATTTATAGTTTTGAAATC  
 specimen R CCGACGCCGGGTTGAAATTATAATATATAAAGGTCCTACTGGGTGGCAAGGGGTGTGAGGTCATTTATAGTTTTGAAATC  
 specimen R\* CCGACGCCGGGTTGAAATTAT--AATATAAAGGTCCTACTGGGTGGTAAGGGGTGTGAGGTCATTTATAGTTTTGAAATC

HQ219653 (A) ATGATATCCTGAGCCCTGAAAGAAGTTTACAAAATAATTTGATCACTTGACTTGGA  
 HQ219650 (A) ATGATATCCTGAGCCCTGAAAGAAGTTTACAAAATAATTTGATCACTTGACTTGGA  
 HQ219649 (A) ATGATATCCTGAGCCCTGAAAGAAGTTTACAAAATAATTTGATCACTTGACTTGGA  
 HQ219646 (A) ATGATATCCTGAGCCCTGAAAGAAGTTTACAAAATAATTTGATCACTTGACTTGGA  
 HQ219645 (A) ATGATATCCTGAGCCCTGAAAGAAGTTTACAAAATAATTTGATCACTTGACTTGGA  
 HQ219644 (A) ATGATATCCTGAGCCCTGAAAGAAGTTTACAAAATAATTTGATCACTTGACTTGGA  
 HQ219642 (A) ATGATATCCTGAGCCCTGAAAGAAGTTTACAAAATAATTTGATCACTTGACTTGGA  
 HQ219641 (A) ATGATATCCTGAGCCCTGAAAGAAGTTTACAAAATAATTTGATCACTTGACTTGGA  
 HQ219637 (A) ATGATATCCTGAGCCCTGAAAGAAGTTTACAAAATAATTTGATCACTTGACTTGGA  
 HQ219630 (A) ATGATATCCTGAGCCCTGAAAGAAGTTTACAAAATAATTTGATCACTTGACTTGGA  
 HQ219629 (A) ATGATATCCTGAGCCCTGAAAGAAGTTTACAAAATAATTTGATCACTTGACTTGGA  
 HQ219651 (B) ATGATATCTCGGGCCCTGAAACAAGTTTACAAAATAATTTGATCACTTGACTTGGA  
 HQ219647 (B) ACGATATCTAGCCCTGAAACAAGTTTACAAAATAATTTGATCACTTGACTTGGA  
 HQ219643 (B) ATGATATCCCGGCCCTGAAACAAGTTTACAAAATAATTTGATCACTTGACTTGGA  
 HQ219635 (B) ATGATATCTCGGGCCCTGAAACAAGTTTACAAAATAATTTGATCACTTGACTTGGA  
 HQ219634 (B) ATGATATCCCGGCCCTGAAACAAGTTTACAAAATAATTTGATCACTTGACTTGGA  
 HQ219633 (B) ATGATATCTCGGGCCCTGAAACAAGTTTACAAAATAATTTGATCACTTGACTTGGA  
 HQ219631 (B) ATGATATCTAGCCCTGAAACAAGTTTACAAAATAATTTGATCACTTGACTTGGA  
 HT (TYPE A) ATGATATCCTGAGCCCTGAAAGAAGTTTACAAAATAATTTGATCACTTGACTTGGA  
 specimen P ATGATATCCCGGCCCTGAAACAAGTTTACAAAATAATTTGATCACTTGACTTGGA  
 specimen R ATGATATCTAGCCCTGAAACAAGTTTACAAAATAATTTGATCACTTGACTTGGA  
 specimen R\* ATGATATCTCGGGCCCTGAAACAAGTTTACAAAATAATTTGATCACTTGACTTGGA

Figure S5

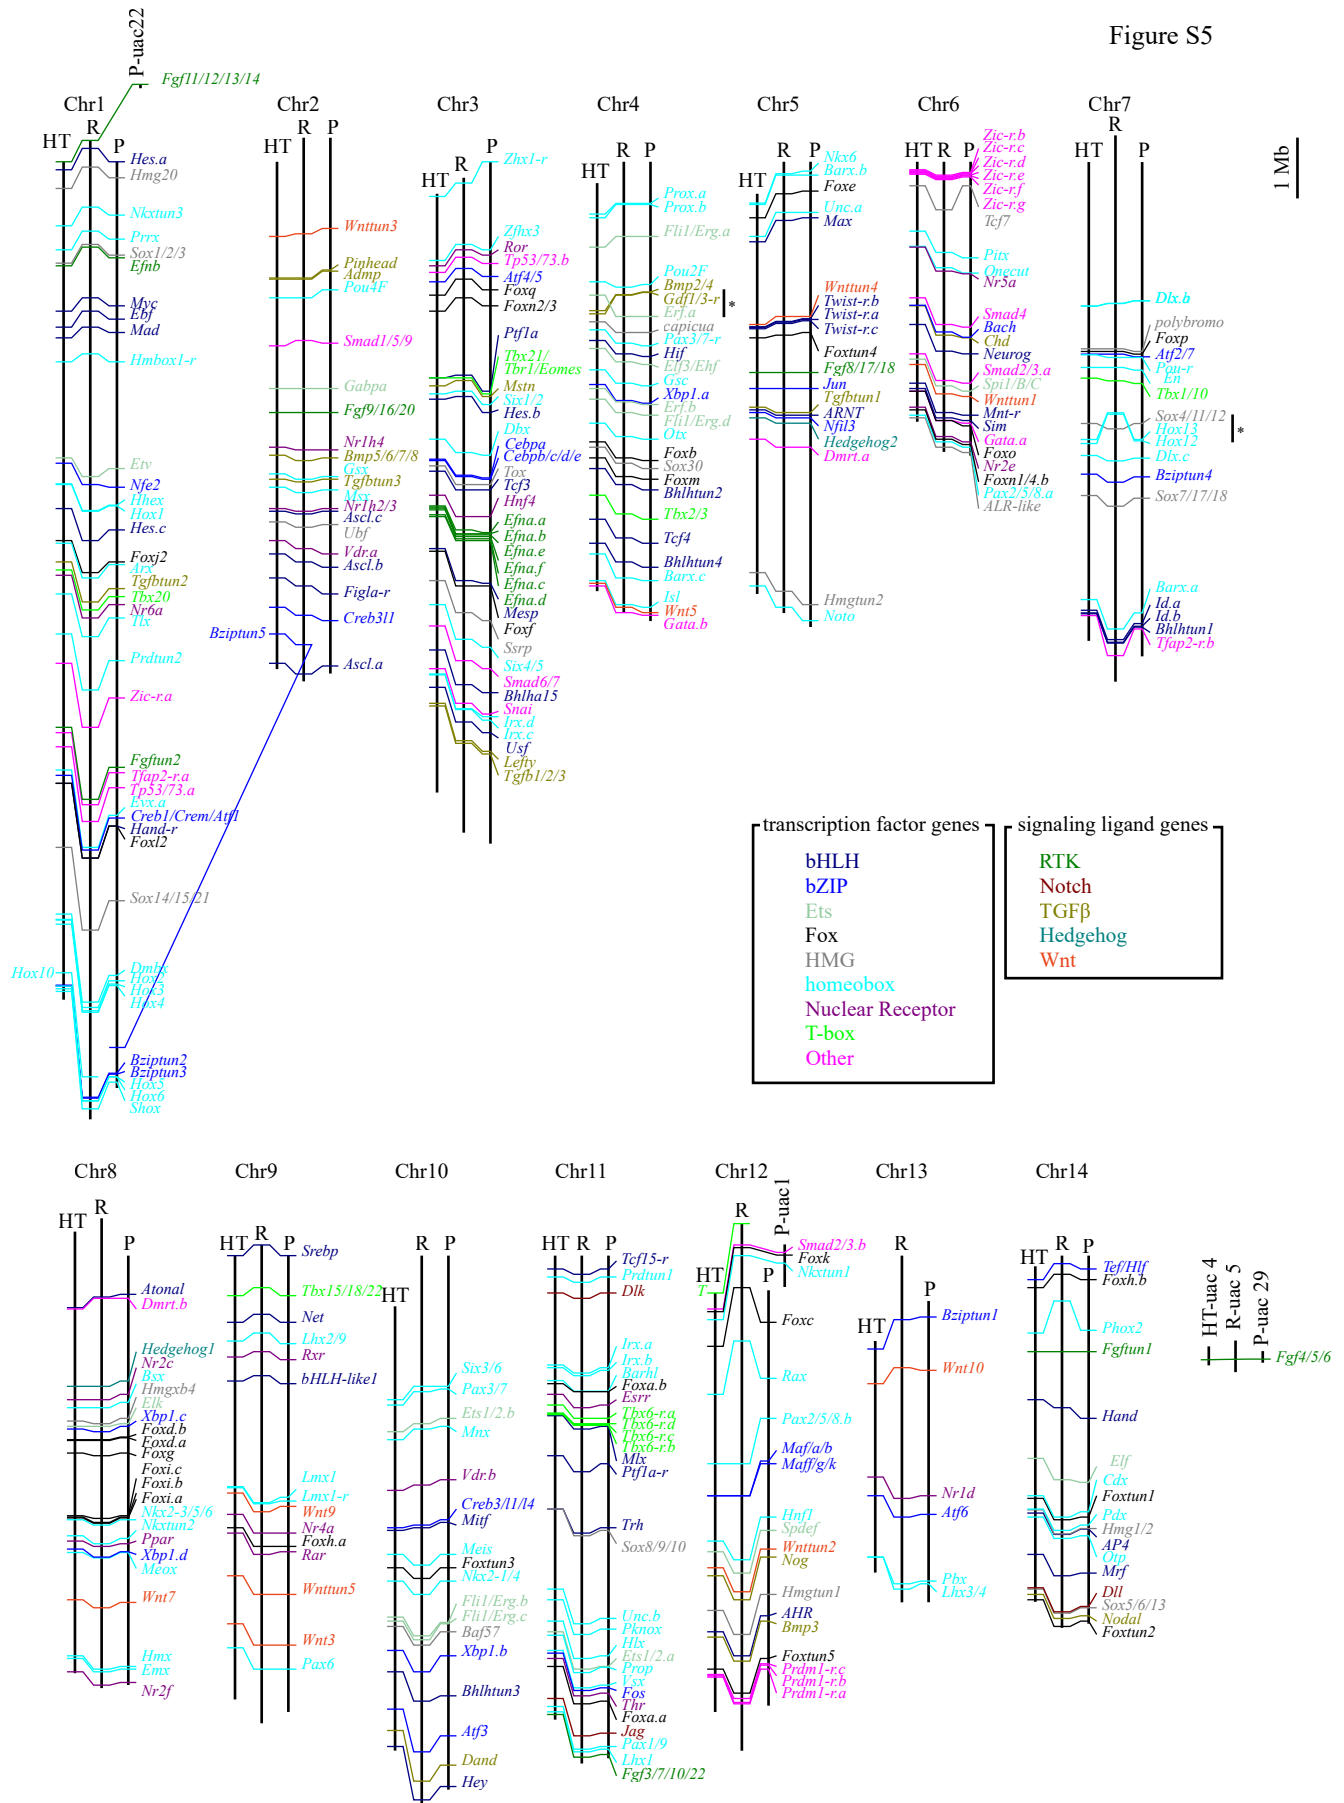

**Supplementary Figure S5. Chromosomal positions of several transcription factor family genes and several signaling molecule family genes.** Vertical lines represent chromosomes of the type-A HT line (HT), specimen R, and specimen P. Several genes were found in contigs that were not assigned to chromosomes (HT-uac, R-uac, and P-uac). *Hox10* and *T(Brachyury)* were not found in the current genomic assembly of specimen P. While *Bziptun5* was found in chromosome 2 of the type A and specimen R, it was found in chromosome 1 of specimen P. Two possible inversions are shown by asterisks. Gene families shown here (except the class 'Other') have been comprehensively annotated previously, and are indicated by different colors. The color code is in the middle of the figure. Identifiers of these genes are shown in supplementary table S6. The scale bar on the right represents 1 Mb.

Figure S6

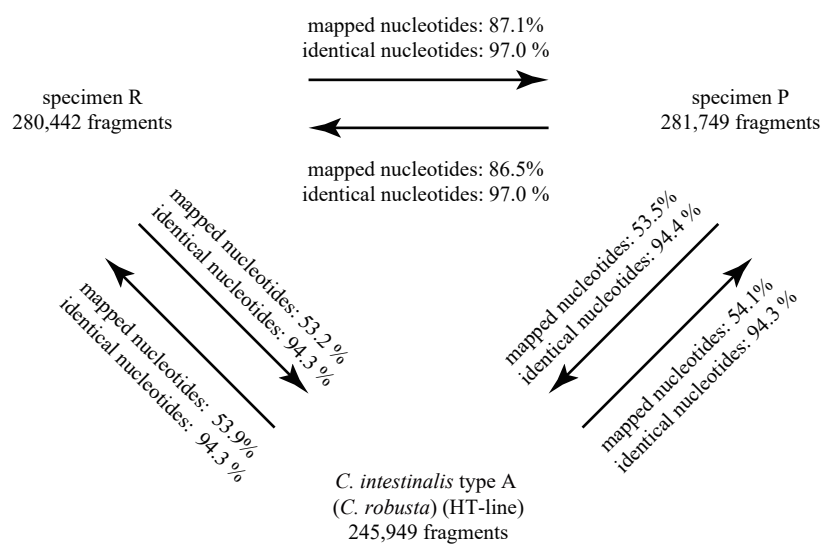

**Supplementary Figure S6. Nucleotide-level comparisons among genomic sequences for two type-B animals and an inbred type-A animal.** Each genomic sequence was divided into 500-bp long fragments and these fragments were aligned to other genomes. Proportions of successfully mapped nucleotides and nucleotide identities in mapped nucleotide regions are shown.

Figure S7

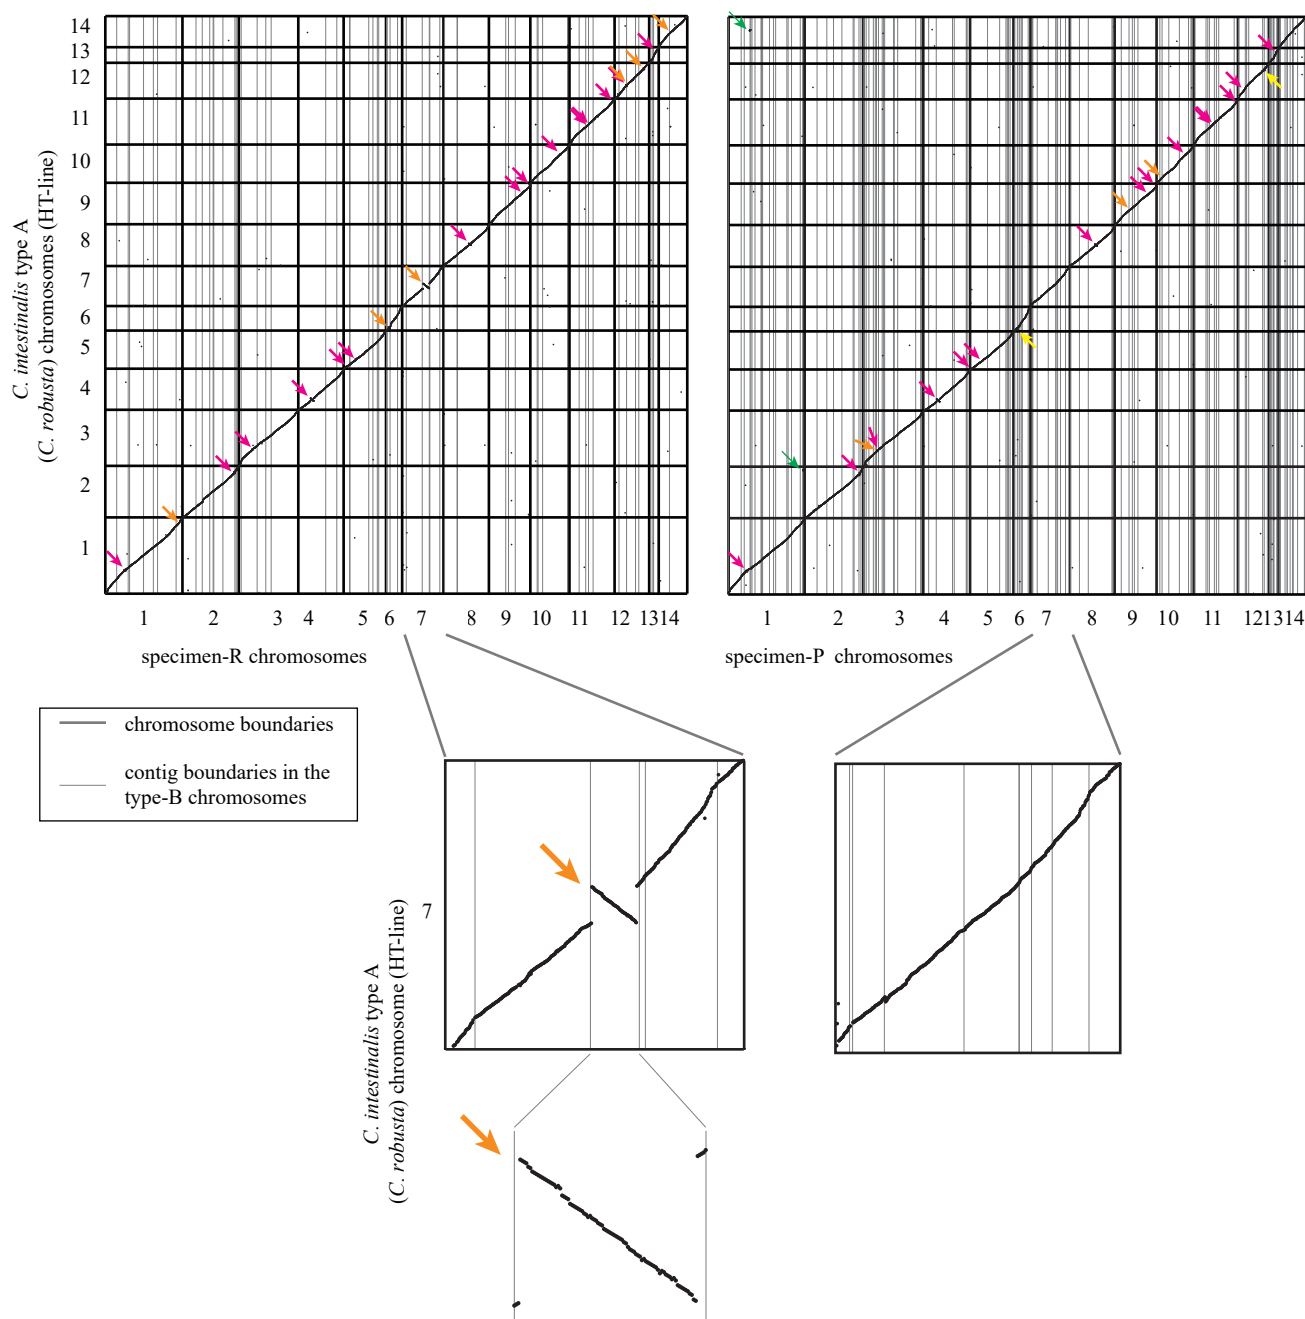

**Figure S7. Comparisons of gene orders between type-A and type-B animals.** Dot plots showing the rank-order position of genes in chromosomes of specimen R (left) and specimen P (right) against chromosomes of the inbred type-A animal (y-axes). High-magnification views of chromosome 7 are shown beneath the main dot plots. High-magnification views for other inversions are provided in supplementary figure S7. Magenta arrows indicate inversions common to specimens R and P. Orange arrows indicate inversions specific to specimen R or P. Yellow arrows indicate sites where two successive inversions likely occurred. Green arrows indicate inter-chromosomal translocations.

Figure S8

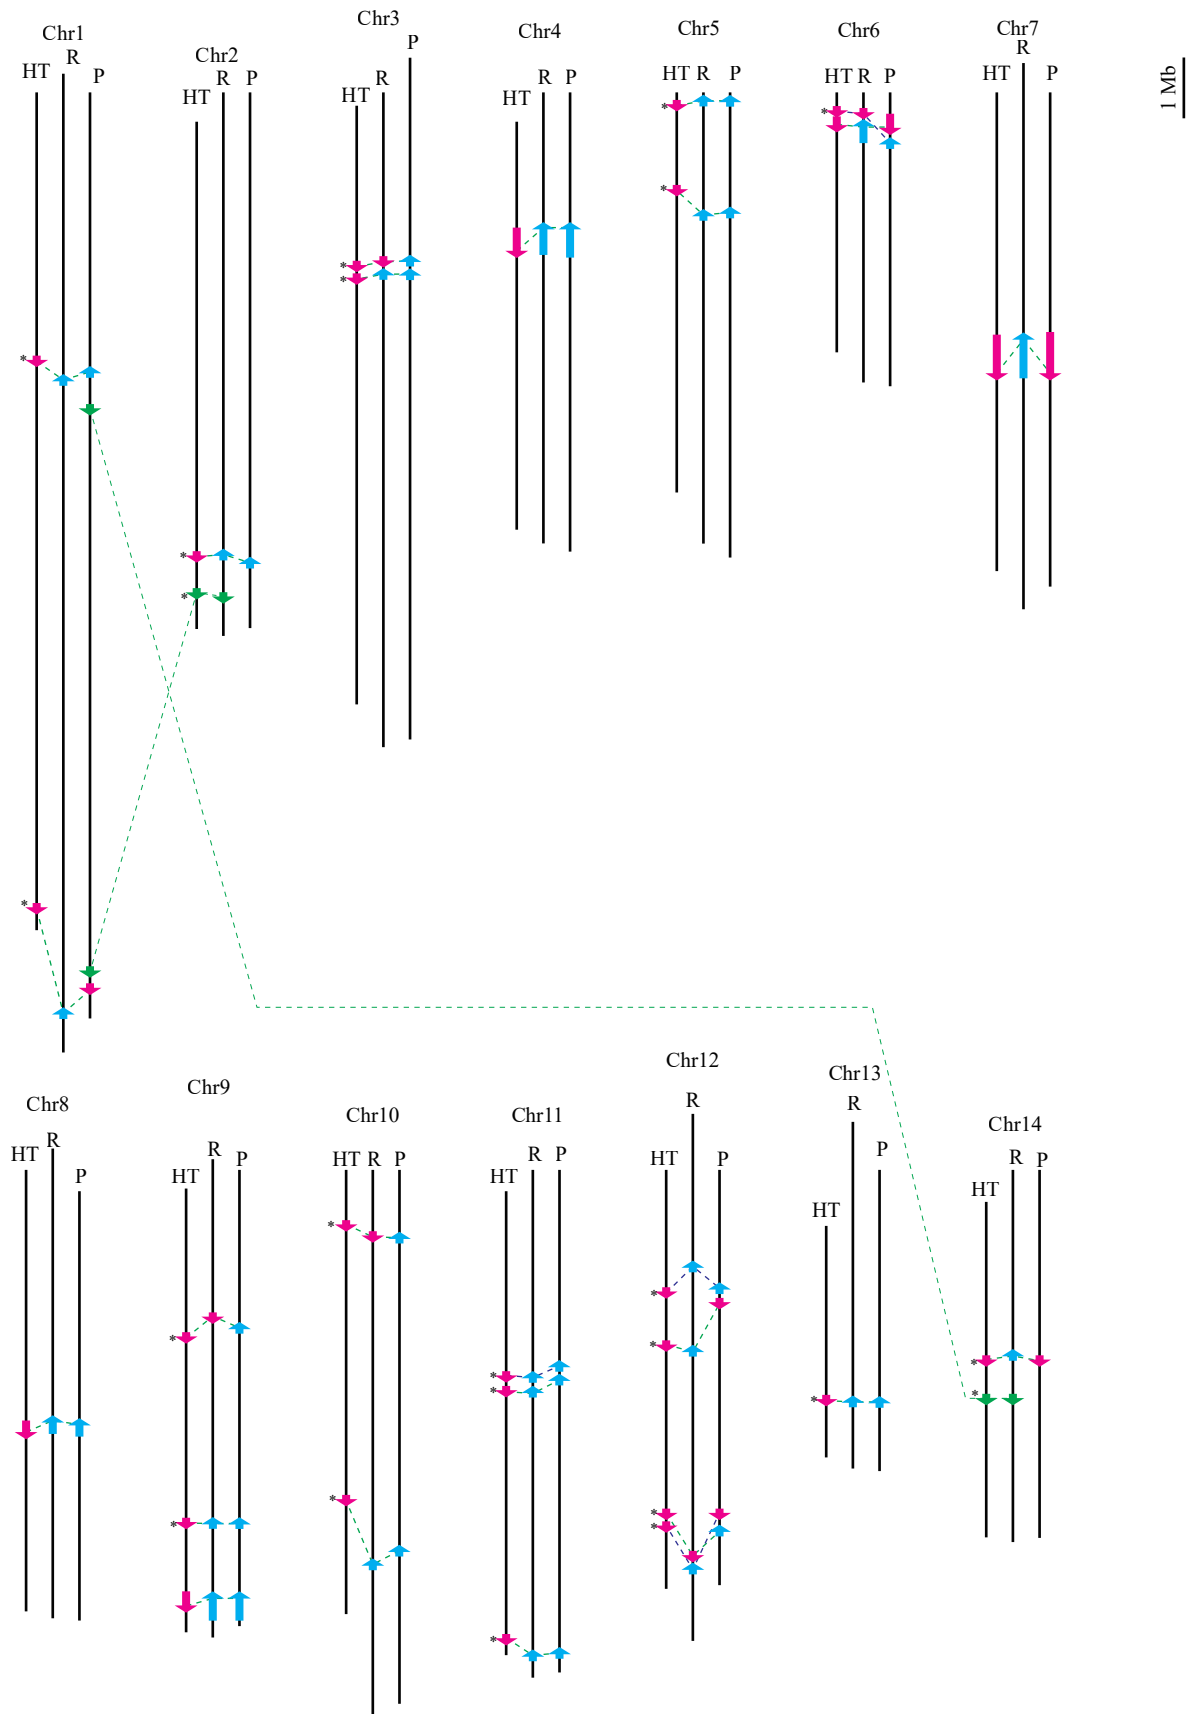

**Supplementary Figure S8. An overview of chromosomes of the inbred type-A animal and two type-B animals.** Vertical lines represent chromosomes of the type-A HT line (HT), specimen R, and specimen P. Magenta and cyan arrows indicate approximate positions of inversions. Cyan arrows indicate inversions against the type-A HT chromosomes. Green arrows indicate approximate positions of inter-chromosomal translocations. Sizes of small arrows marked with asterisks are not proportional to actual sizes. These structural changes were identified by dot plots of the rank-order position of genes in chromosomes of specimens R and P against chromosomes of the inbred type-A animal shown in supplementary figure S6.

A

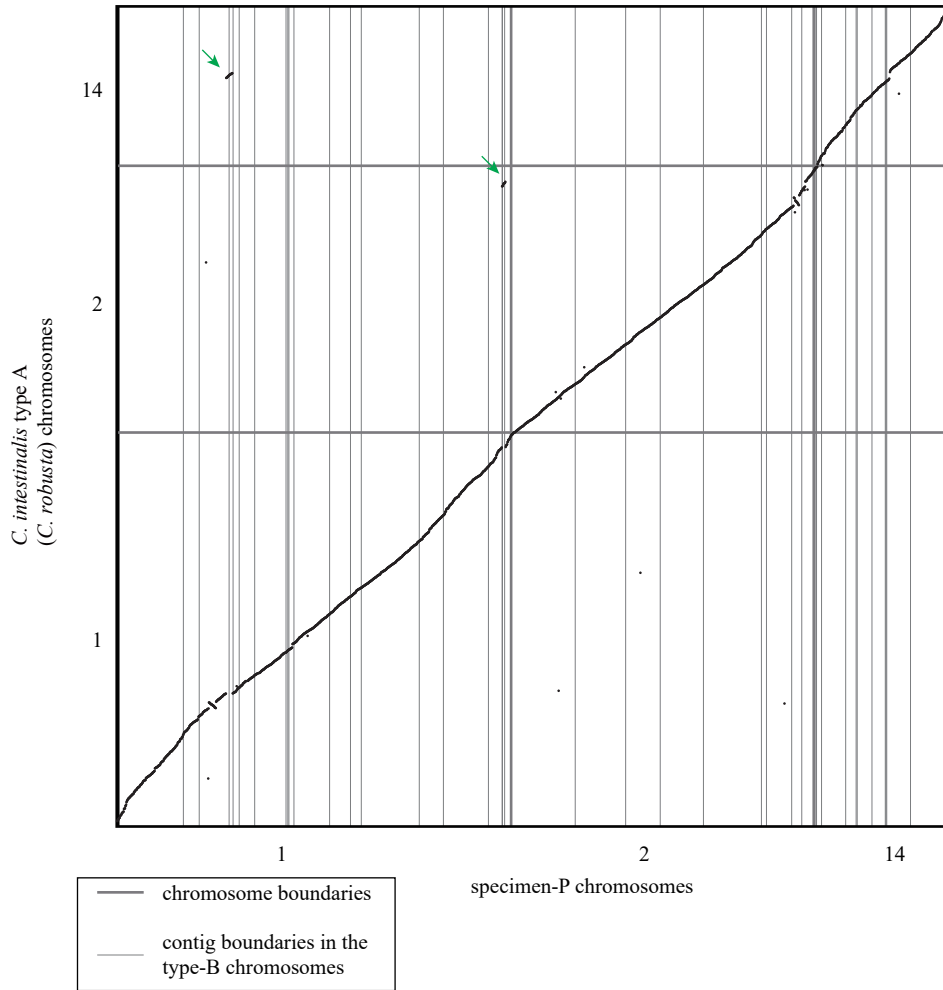

B

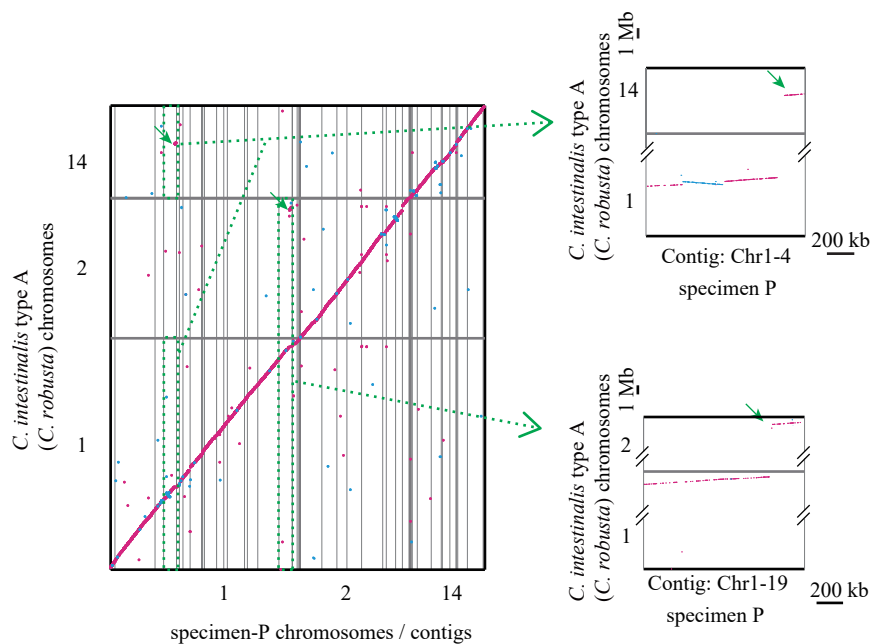

**Supplementary Figure S9. Possible translocations observed in specimen P.** (A) Dot plots showing the rank-order position of genes in chromosomes 1, 2, and 14 of specimen P (x-axis) against corresponding chromosomes of the inbred type-A animal (y-axis). Possible translocations are shown by green arrows. This is a high magnification view of Figure 5. (B) Genomic alignments of the same chromosomes. These alignments also indicate translocations. High magnification views are shown on right.

Figure S10

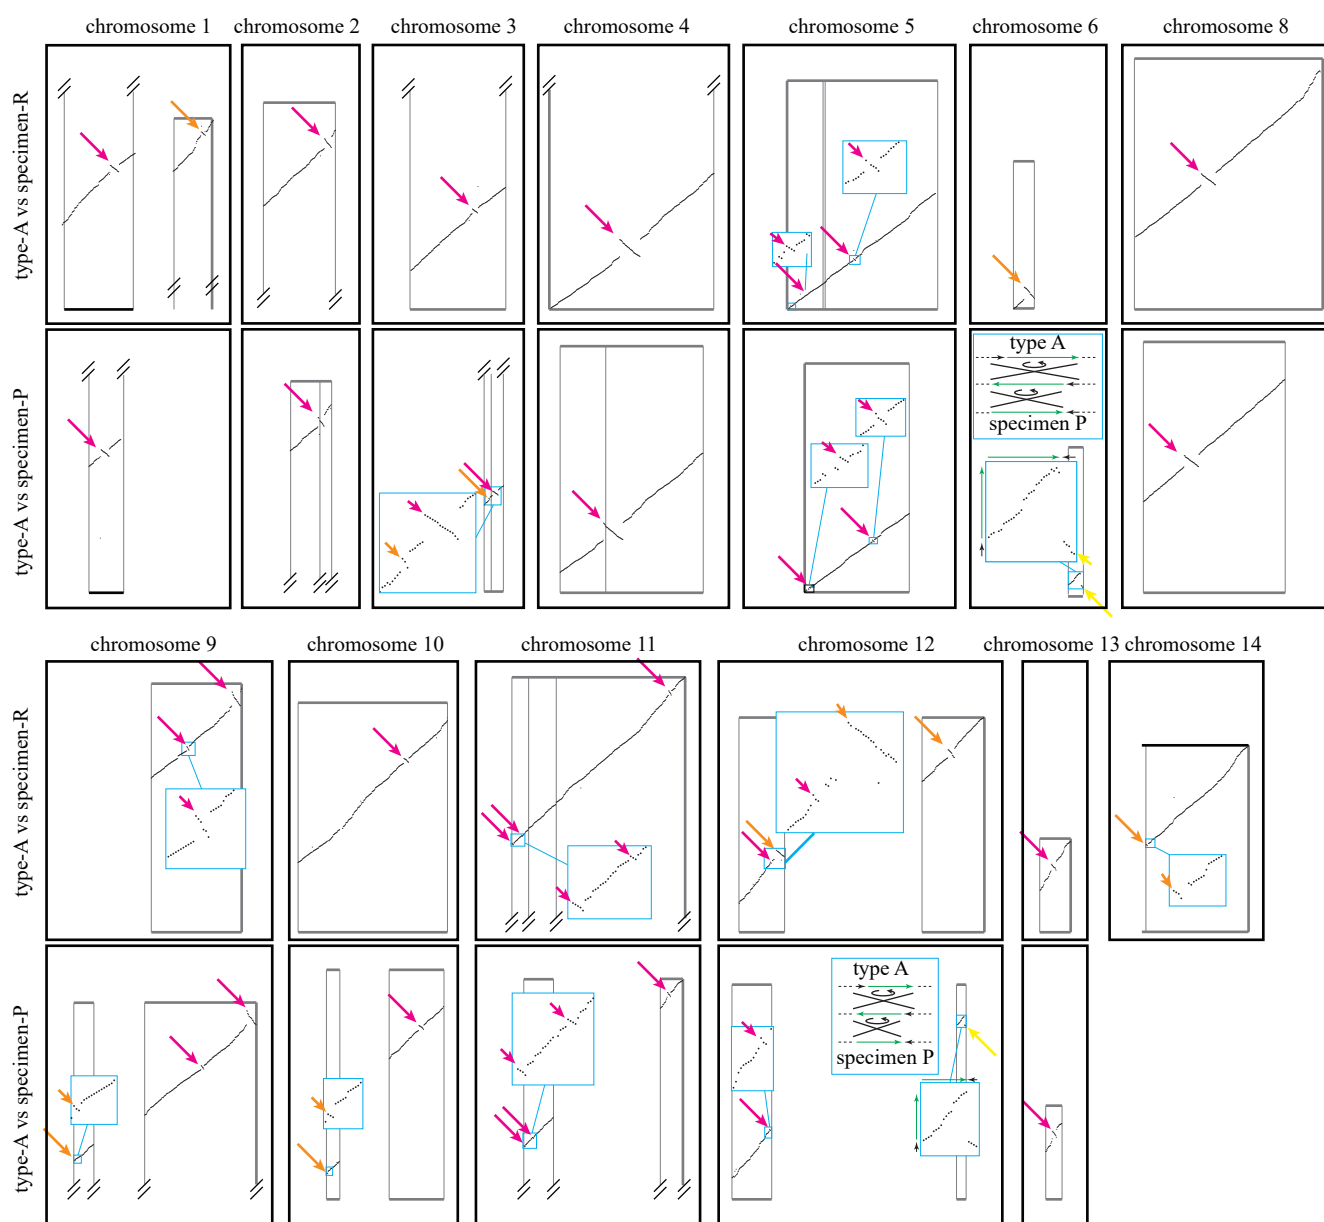

**Supplementary Figure S10. High magnification views of dot plot showing the rank order position of genes shown in supplementary figure S5. Magenta arrows indicate inversions common to specimens R and P. Orange arrows indicate inversions specific to specimen R or P. Yellow arrows indicates sites where two successive inversions likely occurred as illustrated in panels.**

**Supplementary Table S1. Estimation of genome sizes and repeat lengths by Genomescope and Illumina sequencing reads**

|                       | specimen R | specimen P |
|-----------------------|------------|------------|
| Estimated genome size | 124 Mb     | 137 Mb     |
| Repeat length         | 29 Mb      | 46 Mb      |
| Unique length         | 95 Mb      | 91 Mb      |
| Heterozygosity        | 3.0 %      | 3.6 %      |



Supplementary Table S2. Genes found in possible translocated regions.

| Gene model                      | protein model            | Blast E-values | Accession number in the human proteome (UniProtKB) | human protein annotation                                                                    |
|---------------------------------|--------------------------|----------------|----------------------------------------------------|---------------------------------------------------------------------------------------------|
| KY.Chr2.2226                    | KY.Chr2.2226.v7.ND6-5    | 1.52E-14       | Q02817                                             | MUC2 (mucin 2, oligomeric mucus/gel-forming)                                                |
| KY.Chr2.2227                    | KY.Chr2.2227.v3.SL4-3    | 5.91E-108      | P61266                                             | STX1B (syntaxin 1B)                                                                         |
| KY.Chr2.2230                    | KY.Chr2.2230.v1.SL1-1    | 9.68E-109      | Q8WUY9                                             | DEPDC1B (DEP domain containing 1B)                                                          |
| KY.Chr2.2238                    | KY.Chr2.2238.v1.SL1-1    | 0              | O75691                                             | UTP20 (UTP20 small subunit processome component)                                            |
| KY.Chr2.2242                    | KY.Chr2.2242.v2.SL3-2    | 1.47E-40       | Q2TB18                                             | ASTE1 (asteroid homolog 1)                                                                  |
| KY.Chr2.2243                    | KY.Chr2.2243.v1.nonSL6-1 | 3.62E-83       | Q5T8I3                                             | FAM102B (family with sequence similarity 102 member B)                                      |
| KY.Chr2.2244                    | KY.Chr2.2244.v1.SL1-1    | 0              | P17980                                             | PSMC3 (proteasome 26S subunit, ATPase 3)                                                    |
| KY.Chr2.2245                    | KY.Chr2.2245.v2.ND2-2    | 2.59E-88       | P48651                                             | PTDSS1 (phosphatidylserine synthase 1)                                                      |
| KY.Chr2.2247 ( <i>Bzipun5</i> ) | KY.Chr2.2247.v1.nonSL3-1 | 0.13           | P12270                                             | TPR (translocated promoter region, nuclear basket protein)                                  |
| KY.Chr2.2251                    | KY.Chr2.2251.v1.SL1-1    | 0              | Q5THR3                                             | EFCAB6 (EF-hand calcium binding domain 6)                                                   |
| KY.Chr14.540                    | KY.Chr14.540.v1.SL2-1    | 2.25E-12       | Q06520                                             | SULT2A1 (sulfotransferase family 2A member 1)                                               |
| KY.Chr14.541                    | KY.Chr14.541.v1.SL2-1    | 8.18E-54       | Q96RY5                                             | CRAMP1 (cramped chromatin regulator homolog 1)                                              |
| KY.Chr14.542                    | KY.Chr14.542.v1.nonSL3-5 | 1.66E-141      | Q9BXP5                                             | SRRT (serrate, RNA effector molecule)                                                       |
| KY.Chr14.544                    | KY.Chr14.544.v1.SL3-1    | 5.06E-58       | Q5T8P6                                             | RBM26 (RNA binding motif protein 26)                                                        |
| KY.Chr14.545                    | KY.Chr14.545.v2.SL1-2    | 7.37E-119      | Q8NBS9                                             | TXNDC5 (thioredoxin domain containing 5)                                                    |
| KY.Chr14.548                    | KY.Chr14.548.v2.nonSL8-2 | 4.98E-26       | P24539                                             | ATP5PB (ATP synthase peripheral stalk-membrane subunit b)                                   |
| KY.Chr14.549                    | KY.Chr14.549.v1.nonSL7-1 | 6.98E-54       | P83881                                             | RPL36A (ribosomal protein L36a)                                                             |
| KY.Chr14.550                    | KY.Chr14.550.v1.nonSL7-1 | 1.71E-141      | Q9U110                                             | EIF2B4 (eukaryotic translation initiation factor 2B subunit delta)                          |
| KY.Chr14.552                    | KY.Chr14.552.v1.SL1-1    | 1.09E-04       | Q14554                                             | PDIA5 (protein disulfide isomerase family A member 5)                                       |
| KY.Chr14.554                    | KY.Chr14.554.v1.SL1-1    | 1.50E-85       | Q9NUQ2                                             | AGPAT5 (1-acylglycerol-3-phosphate O-acyltransferase 5)                                     |
| KY.Chr14.555                    | KY.Chr14.555.v1.ND1-1    | 3.68E-89       | Q9BW85                                             | YJU2 (YJU2 splicing factor homolog)                                                         |
| KY.Chr14.556                    | KY.Chr14.556.v2.nonSL5-2 | 1.28E-37       | Q16629                                             | SRSF7 (serine and arginine rich splicing factor 7)                                          |
| KY.Chr14.557                    | KY.Chr14.557.v1.SL2-1    | 9.50E-177      | Q8N584                                             | TTC39C (tetratricopeptide repeat domain 39C)                                                |
| KY.Chr14.558                    | KY.Chr14.558.v1.SL3-1    | 1.02E-135      | O00625                                             | PIR (pirin)                                                                                 |
| KY.Chr14.559                    | KY.Chr14.559.v1.SL3-1    | 6.06E-20       | A6H8Y1                                             | BDP1 (B double prime 1, subunit of RNA polymerase III transcription initiation factor IIIB) |
| KY.Chr14.560                    | KY.Chr14.560.v1.SL1-1    | 3.3            | Q6PL18                                             | ATAD2 (ATPase family AAA domain containing 2)                                               |
| KY.Chr14.561                    | KY.Chr14.561.v1.nonSL9-1 | 4.41E-53       | Q9BY84                                             | DUSP16 (dual specificity phosphatase 16)                                                    |
| KY.Chr14.562                    | KY.Chr14.562.v1.SL1-1    | 1.81E-28       | O43529                                             | CHST10 (carbohydrate sulfotransferase 10)                                                   |

### Supplementary Table S3. Inversions identified from gene orders

---

#### **inversions found commonly in specimens R and P<sup>\*1</sup>**

KY.Chr1.1018-1053 (235k, 33), KY.Chr2.2124-2164 (249k, 39), KY.Chr3.483-499 (154k, 17), KY.Chr4.377-454 (560k, 78)<sup>\*2</sup>, KY.Chr5.25-28 (28k, 4), KY.Chr5.265-272 (76k, 8)<sup>\*3</sup>, KY.Chr8.779-842 (336k, 59), KY.Chr9.843-864 (123k, 21), KY.Chr9.1061-1127 (554k, 65), KY.Chr10.1133-1149 (100k, 17), KY.Chr11.532-537 (46k, 6), KY.Chr11.572-574 (14k, 3), KY.Chr11.1268-1295 (116k, 20), KY.Chr12.338-342 (78k, 5), KY.Chr13.346-371 (322k, 26)

#### **inversions found only in specimen R**

KY.Chr1.2558-2567 (57k, 10), KY.Chr6.59-102 (327k, 43), KY.Chr7.593-722 (873k, 127), KY.Chr12.439-466 (213k, 25), KY.Chr12.905-938 (233k 34), KY.Chr14.437-442 (67k, 6)

#### **inversions found only in specimen P**

KY.Chr3.461-467 (45k, 7), KY.Chr6.38-45 (67k, 8)<sup>\*3</sup>, KY.Chr9.407-409 (34k, 3), KY.Chr10.148-150 (24k, 3), KY.Chr12.898-901 (27k, 4)<sup>\*3</sup>

---

<sup>\*1</sup> Numbers in parentheses indicate inversion sizes estimated from gene model positions, and numbers of genes included in each gene block.

<sup>\*2</sup> This inversion is shown to occur specifically in the HT inbred line of type-A animals, and therefore there is not an inversion between wild type-A animals and the sequenced type-B animals.

<sup>\*3</sup> KY.Chr5.269 to KY.Chr5.272 were not mapped to the genome of specimen R.

<sup>\*4</sup> In these inversion sites (KY.Chr6.38–KY.Chr6.102 and KY.Chr12.898–KY.Chr12.938), two successive inversions probably occurred in the specimen P lineage, and one in the specimen R lineage.

Supplementary Table S4. Genes found in inverted regions.

| Gene model   | Specimens with inversions*1 | protein model            | Blast E-values | Accession number in the human proteome (UniProtKB) | human protein annotation                                                                |
|--------------|-----------------------------|--------------------------|----------------|----------------------------------------------------|-----------------------------------------------------------------------------------------|
| KY.Chr1.1018 | R/P                         | KY.Chr1.1018.v1.nonSL1-1 | 4.30E-46       | Q9Y2B2                                             | PIGL (phosphatidylinositol glycan anchor biosynthesis class L)                          |
| KY.Chr1.1019 | R/P                         | KY.Chr1.1019.v1.SL1-1    | 5.17E-57       | Q92574                                             | TSC1 (TSC complex subunit 1)                                                            |
| KY.Chr1.1021 | R/P                         | KY.Chr1.1021.v3.nonSL2-1 | 2.36E-58       | Q14766                                             | LTBP1 (latent transforming growth factor beta binding protein 1)                        |
| KY.Chr1.1022 | R/P                         | KY.Chr1.1022.v2.nonSL2-1 | 0              | Q5HYA8                                             | TMEM67 (transmembrane protein 67)                                                       |
| KY.Chr1.1023 | R/P                         | KY.Chr1.1023.v1.SL1-1    | 1.7            | Q81YG6                                             | LRRC56 (leucine rich repeat containing 56)                                              |
| KY.Chr1.1024 | R/P                         | KY.Chr1.1024.v5.nonSL6-2 | 0              | Q12955                                             | ANK3 (ankyrin 3)                                                                        |
| KY.Chr1.1027 | R/P                         | KY.Chr1.1027.v1.ND1-1    | 1.6            | Q8NE35                                             | CPEB3 (cytoplasmic polyadenylation element binding protein 3)                           |
| KY.Chr1.1028 | R/P                         | KY.Chr1.1028.v1.nonSL5-1 | 8.49E-13       | Q8TDP1                                             | RNASEH2C (ribonuclease H2 subunit C)                                                    |
| KY.Chr1.1029 | R/P                         | KY.Chr1.1029.v1.SL1-1    | 4.05E-24       | Q8TB45                                             | DEPTOR (DEP domain containing MTOR interacting protein)                                 |
| KY.Chr1.1030 | R/P                         | KY.Chr1.1030.v1.ND1-1    | 1.56E-09       | Q8WW35                                             | TCTEX1D2 (Tctex1 domain containing 2)                                                   |
| KY.Chr1.1031 | R/P                         | KY.Chr1.1031.v1.SL7-1    | 4.76E-53       | P62330                                             | ARF6 (ADP ribosylation factor 6)                                                        |
| KY.Chr1.1032 | R/P                         | KY.Chr1.1032.v1.ND1-2    | 0              | Q00341                                             | HDLBP (high density lipoprotein binding protein)                                        |
| KY.Chr1.1033 | R/P                         | KY.Chr1.1033.v1.SL2-1    | 2.12E-104      | Q96G2                                              | PASK (PAS domain containing serine/threonine kinase)                                    |
| KY.Chr1.1034 | R/P                         | KY.Chr1.1034.v4.ND4-1    | 5.88E-23       | Q8N6F1                                             | CLDN19 (claudin 19)                                                                     |
| KY.Chr1.1035 | R/P                         | KY.Chr1.1035.v1.ND1-1    | 2.48E-21       | Q99715                                             | COL12A1 (collagen type XII alpha 1 chain)                                               |
| KY.Chr1.1036 | R/P                         | KY.Chr1.1036.v1.SL3-1    | 1.82E-75       | P46736                                             | BRCC3 (BRCA1/BRCA2-containing complex subunit 3)                                        |
| KY.Chr1.1037 | R/P                         | KY.Chr1.1037.v1.ND1-1    | 0.86           | Q9H5L6                                             | THAP9 (THAP domain containing 9)                                                        |
| KY.Chr1.1038 | R/P                         | KY.Chr1.1038.v1.ND1-1    | 0.16           | POCJ78                                             | ZNF865 (zinc finger protein 865)                                                        |
| KY.Chr1.1039 | R/P                         | KY.Chr1.1039.v1.ND1-1    | 1.34E-14       | B2RNN3                                             | C1QTNF9B (C1q and TNF related 9B)                                                       |
| KY.Chr1.1040 | R/P                         |                          |                |                                                    | no significant match found                                                              |
| KY.Chr1.1041 | R/P                         | KY.Chr1.1041.v2.nonSL2-2 | 0              | Q60832                                             | DKC1 (dyskerin pseudouridine synthase 1)                                                |
| KY.Chr1.1042 | R/P                         | KY.Chr1.1042.v1.nonSL2-1 | 2.55E-161      | Q9Y376                                             | CAB39 (calcium binding protein 39)                                                      |
| KY.Chr1.1043 | R/P                         | KY.Chr1.1043.v1.SL4-1    | 2.18E-63       | Q01804                                             | OTUD4 (OTU deubiquitinase 4)                                                            |
| KY.Chr1.1044 | R/P                         | KY.Chr1.1044.v1.ND1-1    | 3.4            | Q8TEU8                                             | WFIKKN2 (WAP, follistatin/kazal, immunoglobulin, kunitz and netrin domain containing 2) |
| KY.Chr1.1045 | R/P                         | KY.Chr1.1045.v1.ND1-3    | 1.24E-41       | Q96MD2                                             | C12orf66 (chromosome 12 open reading frame 66)                                          |
| KY.Chr1.1046 | R/P                         | KY.Chr1.1046.v1.nonSL5-1 | 4.54E-79       | P08621                                             | SNRNP70 (small nuclear ribonucleoprotein U1 subunit 70)                                 |
| KY.Chr1.1047 | R/P                         | KY.Chr1.1047.v1.ND1-2    | 1.5            | B1AJZ9                                             | FHADI (forkhead associated phosphopeptide binding domain 1)                             |
| KY.Chr1.1048 | R/P                         | KY.Chr1.1048.v1.ND1-1    | 1.6            | B1AJZ9                                             | FHADI (forkhead associated phosphopeptide binding domain 1)                             |
| KY.Chr1.1049 | R/P                         | KY.Chr1.1049.v1.nonSL9-1 | 0              | Q9UN76                                             | SLC6A14 (solute carrier family 6 member 14)                                             |
| KY.Chr1.1050 | R/P                         | KY.Chr1.1050.v1.ND1-1    | 0.3            | Q75151                                             | PHE2 (PHD finger protein 2)                                                             |
| KY.Chr1.1051 | R/P                         | KY.Chr1.1051.v1.ND1-1    | 0              | Q9UN76                                             | SLC6A14 (solute carrier family 6 member 14)                                             |
| KY.Chr1.1052 | R/P                         | KY.Chr1.1052.v1.nonSL3-1 | 0              | Q9UN76                                             | SLC6A14 (solute carrier family 6 member 14)                                             |
| KY.Chr1.1053 | R/P                         | KY.Chr1.1053.v1.SL1-1    | 7.40E-153      | Q15021                                             | NCAPD2 (non-SMC condensin I complex subunit D2)                                         |
| KY.Chr1.2558 | R                           | KY.Chr1.2558.v1.ND1-1    | 3.85E-32       | P28358                                             | HOXD10 (homeobox D10)                                                                   |
| KY.Chr1.2559 | R                           |                          |                |                                                    | no significant match found                                                              |
| KY.Chr1.2560 | R                           | KY.Chr1.2560.v1.nonSL3-1 | 0.098          | A8MT70                                             | ZBBX (zinc finger B-box domain containing)                                              |
| KY.Chr1.2561 | R                           | KY.Chr1.2561.v1.SL1-1    | 4.03E-83       | Q9U140                                             | SLC24A2 (solute carrier family 24 member 2)                                             |
| KY.Chr1.2562 | R                           | KY.Chr1.2562.v1.nonSL4-2 | 1.01E-116      | Q676U5                                             | ATG16L1 (autophagy related 16 like 1)                                                   |
| KY.Chr1.2563 | R                           | KY.Chr1.2563.v1.nonSL5-1 | 9.61E-89       | P48052                                             | CPA2 (carboxypeptidase A2)                                                              |
| KY.Chr1.2564 | R                           | KY.Chr1.2564.v1.nonSL3-1 | 3.30E-31       | Q96EA4                                             | SPDL1 (spindle apparatus coiled-coil protein 1)                                         |
| KY.Chr1.2565 | R                           | KY.Chr1.2565.v1.nonSL9-1 | 6.81E-98       | Q6UB28                                             | METAP1D (methionyl aminopeptidase type 1D mitochondrial)                                |
| KY.Chr1.2566 | R                           | KY.Chr1.2566.v1.ND1-1    | 0.4            | Q6P9A2                                             | GALNT18 (polypeptide N-acetylgalactosaminyltransferase 18)                              |
| KY.Chr1.2567 | R                           | KY.Chr1.2567.v2.nonSL2-1 | 0              | Q504Q3                                             | PAN2 (poly(A) specific ribonuclease subunit PAN2)                                       |
| KY.Chr2.2124 | R/P                         | KY.Chr2.2124.v1.SL1-1    | 0.15           | Q9UPT6                                             | MAPK8IP3 (mitogen-activated protein kinase 8 interacting protein 3)                     |
| KY.Chr2.2125 | R/P                         | KY.Chr2.2125.v1.ND1-1    | 0.74           | A6NJY1                                             | SLC9B1P1 (solute carrier family 9 member B1 pseudogene 1)                               |
| KY.Chr2.2126 | R/P                         | KY.Chr2.2126.v1.SL1-1    | 0              | Q96G46                                             | DUS3L (dihydrouridine synthase 3 like)                                                  |
| KY.Chr2.2127 | R/P                         | KY.Chr2.2127.v1.nonSL2-1 | 3.83E-51       | Q8TCD6                                             | PHOSPHO2 (phosphatase, orphan 2)                                                        |
| KY.Chr2.2128 | R/P                         | KY.Chr2.2128.v1.ND1-1    | 1.45E-14       | Q9H628                                             | RERGL (RERGL like)                                                                      |
| KY.Chr2.2129 | R/P                         | KY.Chr2.2129.v1.SL2-1    | 4.14E-26       | Q9UM22                                             | SYNRG (synergin gamma)                                                                  |
| KY.Chr2.2130 | R/P                         | KY.Chr2.2130.v1.SL1-1    | 3.14E-10       | Q9BUT9                                             | MCRIP2 (MAPK regulated corepressor interacting protein 2)                               |
| KY.Chr2.2131 | R/P                         | KY.Chr2.2131.v1.SL1-1    | 1.65E-57       | Q95825                                             | CRYZL1 (crystallin zeta like 1)                                                         |
| KY.Chr2.2132 | R/P                         | KY.Chr2.2132.v2.nonSL2-2 | 2.58E-70       | Q9H841                                             | NIPAL2 (NIPA like domain containing 2)                                                  |
| KY.Chr2.2133 | R/P                         | KY.Chr2.2133.v1.nonSL9-1 | 5.96E-92       | Q9UBK7                                             | RABL2A (RAB, member of RAS oncogene family like 2A)                                     |
| KY.Chr2.2134 | R/P                         | KY.Chr2.2134.v1.SL1-1    | 0.005          | Q12918                                             | KLRB1 (killer cell lectin like receptor B1)                                             |
| KY.Chr2.2135 | R/P                         | KY.Chr2.2135.v2.nonSL3-1 | 1.01E-81       | Q9Y6C9                                             | MTCH2 (mitochondrial carrier 2)                                                         |
| KY.Chr2.2136 | R/P                         | KY.Chr2.2136.v1.nonSL2-1 | 1.00E-115      | Q96017                                             | CHEK2 (checkpoint kinase 2)                                                             |
| KY.Chr2.2137 | R/P                         | KY.Chr2.2137.v1.nonSL8-4 | 1.05E-142      | Q9HBI1                                             | PARVB (parvin beta)                                                                     |
| KY.Chr2.2138 | R/P                         | KY.Chr2.2138.v2.SL2-1    | 0              | Q9H1V8                                             | SLC6A17 (solute carrier family 6 member 17)                                             |
| KY.Chr2.2139 | R/P                         | KY.Chr2.2139.v1.SL1-1    | 0.74           | P52948                                             | NUP98 (nucleoporin 98)                                                                  |
| KY.Chr2.2140 | R/P                         | KY.Chr2.2140.v1.SL1-1    | 0              | Q60337                                             | MARCH6 (membrane associated ring-CH-type finger 6)                                      |
| KY.Chr2.2141 | R/P                         | KY.Chr2.2141.v2.SL2-1    | 0              | Q9Y5L0                                             | TNPO3 (transportin 3)                                                                   |
| KY.Chr2.2142 | R/P                         | KY.Chr2.2142.v1.SL1-1    | 0.59           | Q9H6D7                                             | HAUSA (HAUS augmin like complex subunit 4)                                              |
| KY.Chr2.2143 | R/P                         | KY.Chr2.2143.v1.SL2-1    | 2.24E-56       | Q60239                                             | SH3BP5 (SH3 domain binding protein 5)                                                   |
| KY.Chr2.2144 | R/P                         | KY.Chr2.2144.v1.ND1-2    | 1.7            | P67775                                             | PPP2CA (protein phosphatase 2 catalytic subunit alpha)                                  |
| KY.Chr2.2145 | R/P                         | KY.Chr2.2145.v1.ND1-1    | 2.58E-11       | P47972                                             | NPTX2 (neuronal pentraxin 2)                                                            |
| KY.Chr2.2146 | R/P                         | KY.Chr2.2146.v1.nonSL2-1 | 1.08E-08       | Q86X45                                             | LRRC6 (leucine rich repeat containing 6)                                                |
| KY.Chr2.2147 | R/P                         | KY.Chr2.2147.v5.ND4-3    | 2.87E-37       | Q6UXH9                                             | PAMR1 (peptidase domain containing associated with muscle regeneration 1)               |
| KY.Chr2.2149 | R/P                         | KY.Chr2.2149.v1.nonSL9-2 | 2.90E-25       | P07305                                             | H1FO (H1 histone family member 0)                                                       |
| KY.Chr2.2151 | R/P                         | KY.Chr2.2151.v1.SL6-1    | 0.64           | O15015                                             | ZNF646 (zinc finger protein 646)                                                        |
| KY.Chr2.2152 | R/P                         | KY.Chr2.2152.v2.nonSL9-5 | 7.77E-08       | Q8NHG7                                             | SVIP (small VCP interacting protein)                                                    |
| KY.Chr2.2153 | R/P                         | KY.Chr2.2153.v1.nonSL7-1 | 1.03E-83       | P15531                                             | NME1 (NME/NM23 nucleoside diphosphate kinase 1)                                         |
| KY.Chr2.2154 | R/P                         | KY.Chr2.2154.v1.ND1-1    | 0.12           | Q9BQ88                                             | FYCO1 (FYVE and coiled-coil domain containing 1)                                        |
| KY.Chr2.2155 | R/P                         | KY.Chr2.2155.v1.SL2-1    | 1.32E-24       | Q96B77                                             | TMEM186 (transmembrane protein 186)                                                     |
| KY.Chr2.2156 | R/P                         | KY.Chr2.2156.v2.SL1-1    | 5.44E-77       | Q8WUB8                                             | PHF10 (PHD finger protein 10)                                                           |
| KY.Chr2.2157 | R/P                         | KY.Chr2.2157.v1.nonSL3-1 | 8.39E-39       | Q9H218                                             | LRMDA (leucine rich melanocyte differentiation associated)                              |
| KY.Chr2.2158 | R/P                         | KY.Chr2.2158.v3.SL1-3    | 1.07E-42       | P12110                                             | COL6A2 (collagen type VI alpha 2 chain)                                                 |
| KY.Chr2.2159 | R/P                         | KY.Chr2.2159.v1.ND1-1    | 0.65           | Q9P2P5                                             | HECW2 (HECT, C2 and WW domain containing E3 ubiquitin protein ligase 2)                 |
| KY.Chr2.2160 | R/P                         | KY.Chr2.2160.v1.nonSL9-1 | 1.07E-20       | Q86VR8                                             | FJX1 (four-jointed box kinase 1)                                                        |
| KY.Chr2.2161 | R/P                         | KY.Chr2.2161.v2.ND2-2    | 2              | P49821                                             | NDUFV1 (NADH:ubiquinone oxidoreductase core subunit V1)                                 |
| KY.Chr2.2162 | R/P                         | KY.Chr2.2162.v1.ND1-1    | 1              | A6NHS7                                             | MANSC4 (MANSC domain containing 4)                                                      |
| KY.Chr2.2163 | R/P                         | KY.Chr2.2163.v1.nonSL3-1 | 1              | A6NGR9                                             | MROH6 (maestro heat like repeat family member 6)                                        |
| KY.Chr2.2164 | R/P                         | KY.Chr2.2164.v2.nonSL5-2 | 1.70E-50       | Q13148                                             | TARDBP (TAR DNA binding protein)                                                        |
| KY.Chr3.461  | P                           | KY.Chr3.461.v2.SL2-2     | 1.72E-30       | Q96K78                                             | ADGRG7 (Adhesion G protein-coupled receptor G7)                                         |
| KY.Chr3.462  | P                           | KY.Chr3.462.v2.SL1-2     | 1              | Q06609                                             | RAD51 (RAD51 recombinase)                                                               |
| KY.Chr3.463  | P                           | KY.Chr3.463.v1.ND1-1     | 2.9            | P21266                                             | GSTM3 (glutathione S-transferase mu 3)                                                  |
| KY.Chr3.464  | P                           | KY.Chr3.464.v1.SL1-1     | 1.90E-67       | Q96NT5                                             | SLC46A1 (solute carrier family 46 member 1)                                             |
| KY.Chr3.465  | P                           | KY.Chr3.465.v1.SL1-1     | 8.59E-28       | Q96NT5                                             | SLC46A1 (solute carrier family 46 member 1)                                             |
| KY.Chr3.466  | P                           | KY.Chr3.466.v1.ND1-1     | 1.03E-10       | Q96NT5                                             | SLC46A1 (solute carrier family 46 member 1)                                             |
| KY.Chr3.467  | P                           | KY.Chr3.467.v2.SL6-1     | 3.17E-24       | Q8WU39                                             | MZB1 (marginal zone B and B1 cell specific protein)                                     |
| KY.Chr3.483  | R/P                         | KY.Chr3.483.v1.nonSL5-1  | 0              | Q9BTY2                                             | FUCA2 (alpha-L-fucosidase 2)                                                            |
| KY.Chr3.484  | R/P                         | KY.Chr3.484.v1.nonSL8-2  | 1.10E-07       | P02511                                             | CRYAB (crystallin alpha B)                                                              |
| KY.Chr3.485  | R/P                         | KY.Chr3.485.v1.nonSL9-1  | 1.90E-09       | P02511                                             | CRYAB (crystallin alpha B)                                                              |
| KY.Chr3.486  | R/P                         | KY.Chr3.486.v1.SL3-1     | 2.6            | Q8WVT3                                             | TRAPP12 (trafficking protein particle complex 12)                                       |
| KY.Chr3.487  | R/P                         | KY.Chr3.487.v1.ND1-1     | 4.10E-95       | Q15326                                             | ZMYND11 (zinc finger MYND-type containing 11)                                           |
| KY.Chr3.488  | R/P                         | KY.Chr3.488.v1.nonSL6-1  | 0              | Q96KA5                                             | CLPTM1L (CLPTM1 like)                                                                   |
| KY.Chr3.489  | R/P                         | KY.Chr3.489.v4.nonSL9-1  | 3.56E-178      | P07237                                             | P4HB (prolyl 4-hydroxylase subunit beta)                                                |
| KY.Chr3.490  | R/P                         | KY.Chr3.490.v1.SL1-2     | 0              | Q9Y5B9                                             | SUPT16H (SPT16 homolog facilitates chromatin remodeling subunit)                        |
| KY.Chr3.491  | R/P                         | KY.Chr3.491.v1.ND1-2     | 0.88           | Q68CQ4                                             | UTP25 (UTP25 small subunit processor component)                                         |
| KY.Chr3.492  | R/P                         | KY.Chr3.492.v1.SL5-1     | 5.97E-97       | Q8NCC3                                             | PLA2G15 (phospholipase A2 group XV)                                                     |
| KY.Chr3.493  | R/P                         | KY.Chr3.493.v1.ND1-1     | 2.4            | Q9UPX0                                             | IGSF9B (immunoglobulin superfamily member 9B)                                           |
| KY.Chr3.494  | R/P                         | KY.Chr3.494.v1.SL2-4     | 1.05E-98       | Q6P6C2                                             | ALKBH5 (alkB homolog 5 RNA demethylase)                                                 |
| KY.Chr3.495  | R/P                         | KY.Chr3.495.v1.nonSL1-1  | 0              | Q9Y2A7                                             | NCKAP1 (NCK associated protein 1)                                                       |
| KY.Chr3.496  | R/P                         | KY.Chr3.496.v1.ND1-1     | 2.10E-04       | Q15149                                             | PLEC (plectin)                                                                          |
| KY.Chr3.497  | R/P                         | KY.Chr3.497.v1.ND1-1     | 2.30E-154      | Q14028                                             | CNGB1 (cyclic nucleotide gated channel beta 1)                                          |
| KY.Chr3.498  | R/P                         | KY.Chr3.498.v1.ND1-1     | 2.76E-92       | Q8TB37                                             | NUBPL (nucleotide binding protein like)                                                 |
| KY.Chr3.499  | R/P                         | KY.Chr3.499.v1.ND1-2     | 0              | Q15393                                             | SF3B3 (splicing factor 3b subunit 3)                                                    |
| KY.Chr4.377  | R/P                         | KY.Chr4.377.v1.ND1-1     | 1.76E-33       | Q13546                                             | RIPK1 (receptor interacting serine/threonine kinase 1)                                  |
| KY.Chr4.378  | R/P                         | KY.Chr4.378.v1.ND1-1     | 1.7            | Q7Z7A3                                             | CTU1 (cytosolic thouridylase subunit 1)                                                 |
| KY.Chr4.379  | R/P                         | KY.Chr4.379.v1.ND1-1     | 1.13E-132      | P38117                                             | ETFB (electron transfer flavoprotein subunit beta)                                      |
| KY.Chr4.380  | R/P                         | KY.Chr4.380.v1.SL2-1     | 2.30E-81       | Q96JD6                                             | AKR1E2 (aldo-keto reductase family 1 member E2)                                         |
| KY.Chr4.381  | R/P                         | KY.Chr4.381.v1.nonSL9-1  | 7.74E-34       | P25963                                             | NFKBIA (NFKB inhibitor alpha)                                                           |
| KY.Chr4.382  | R/P                         | KY.Chr4.382.v1.ND1-1     | 0.23           | Q4W4Y0                                             | C14orf28 (chromosome 14 open reading frame 28)                                          |
| KY.Chr4.383  | R/P                         | KY.Chr4.383.v1.SL1-1     | 7.93E-46       | Q96011                                             | PEX11B (peroxisomal biogenesis factor 11 beta)                                          |
| KY.Chr4.384  | R/P                         | KY.Chr4.384.v1.nonSL2-1  | 3.38E-79       | Q53G59                                             | KLHL12 (kelch like family member 12)                                                    |

|                                    |                                                            |                         |           |        |                                                                                  |
|------------------------------------|------------------------------------------------------------|-------------------------|-----------|--------|----------------------------------------------------------------------------------|
| KY.Chr4.385                        | R/P                                                        | KY.Chr4.385.v1.ND1-1    | 1.4       | P18074 | ERCC2 (ERCC excision repair 2 TFIIH core complex helicase subunit)               |
| KY.Chr4.386                        | R/P                                                        | KY.Chr4.386.v2.nonSL3-2 | 0         | O15523 | DDX3Y (DEAD-box helicase 3 Y-linked)                                             |
| KY.Chr4.387                        | R/P                                                        | KY.Chr4.387.v1.nonSL3-1 | 0         | Q96CW5 | TUBGP3 (tubulin gamma complex associated protein 3)                              |
| KY.Chr4.388                        | R/P                                                        | KY.Chr4.388.v1.nonSL3-1 | 2.4       | Q96SM3 | CPXM1 (carboxypeptidase X M14 family member 1)                                   |
| KY.Chr4.389                        | R/P                                                        | KY.Chr4.389.v1.nonSL4-2 | 2.4       | Q6NSJ2 | PHLDB3 (pleckstrin homology like domain family B member 3)                       |
| KY.Chr4.390                        | R/P                                                        | KY.Chr4.390.v1.ND1-1    | 1         | A5PLN7 | FAM149A (family with sequence similarity 149 member A)                           |
| KY.Chr4.391                        | R/P                                                        | KY.Chr4.391.v1.nonSL9-1 | 3.00E-23  | Q5VYJ5 | MALRD1 (MAM and LDL receptor class A domain containing 1)                        |
| KY.Chr4.392                        | R/P                                                        | KY.Chr4.392.v1.ND1-1    | 4.84E-10  | Q8NFP4 | MDGA1 (MAM domain containing glycosylphosphatidylinositol anchor 1)              |
| KY.Chr4.393                        | R/P                                                        | KY.Chr4.393.v1.ND1-1    | 1.2       | Q9C037 | TRIM4 (tripartite motif containing 4)                                            |
| KY.Chr4.394                        | R/P                                                        | KY.Chr4.394.v1.SL3-1    | 8.02E-101 | Q76082 | SLC22A5 (solute carrier family 22 member 5)                                      |
| KY.Chr4.395                        | R/P                                                        | KY.Chr4.395.v1.ND1-1    | 5.4       | P47890 | OR1G1 (olfactory receptor family 1 subfamily G member 1)                         |
| KY.Chr4.396                        | R/P                                                        | KY.Chr4.396.v1.ND1-1    | 1.9       | Q9BZE4 | GTPBP4 (GTP binding protein 4)                                                   |
| KY.Chr4.397                        | R/P                                                        | KY.Chr4.397.v1.SL4-1    | 0         | Q9H7Z6 | KAT8 (lysine acetyltransferase 8)                                                |
| KY.Chr4.398                        | R/P                                                        | KY.Chr4.398.v1.SL1-1    | 0.6       | Q86YH2 | ZNF280B (zinc finger protein 280B)                                               |
| KY.Chr4.399                        | R/P                                                        | KY.Chr4.399.v1.SL1-1    | 7.24E-97  | Q9NUM3 | SLC39A9 (solute carrier family 39 member 9)                                      |
| KY.Chr4.400                        | R/P                                                        | KY.Chr4.400.v1.ND1-1    | 2.7       | Q7RTX7 | CATSPER4 (cation channel sperm associated 4)                                     |
| KY.Chr4.401                        | R/P                                                        | KY.Chr4.401.v1.SL1-1    | 4.69E-69  | Q96NE9 | FRMD6 (FERM domain containing 6)                                                 |
| KY.Chr4.402                        | R/P                                                        | KY.Chr4.402.v1.nonSL4-1 | 2.96E-92  | O43462 | MBTPS2 (membrane bound transcription factor peptidase site 2)                    |
| KY.Chr4.403                        | R/P                                                        | KY.Chr4.403.v1.ND1-1    | 0.008     | O60637 | TSPAN3 (tetraspanin 3)                                                           |
| KY.Chr4.404                        | R/P                                                        | KY.Chr4.404.v1.nonSL9-1 | 2.59E-87  | O96008 | TOMM40 (translocase of outer mitochondrial membrane 40)                          |
| KY.Chr4.405                        | R/P                                                        | KY.Chr4.405.v1.ND1-1    | 0.42      | Q99996 | AKAP9 (A-kinase anchoring protein 9)                                             |
| KY.Chr4.406                        | R/P                                                        | KY.Chr4.406.v1.SL1-1    | 1.30E-10  | A6NLC5 | C3orf70 (chromosome 3 open reading frame 70)                                     |
| KY.Chr4.407                        | R/P                                                        | KY.Chr4.407.v1.ND1-1    | 2.97E-63  | P41182 | BCL6 (BCL6 transcription repressor)                                              |
| KY.Chr4.408                        | R/P                                                        | KY.Chr4.408.v2.SL11-3   | 6.42E-169 | Q8WUM0 | NUP133 (nucleoporin 133)                                                         |
| KY.Chr4.409                        | R/P                                                        | KY.Chr4.409.v1.ND1-2    | 3.5       | P24592 | IGFBP6 (insulin like growth factor binding protein 6)                            |
| KY.Chr4.410                        | R/P                                                        | KY.Chr4.410.v1.ND1-1    | 1.1       | Q8N8R1 | TRPV1 (transient receptor potential cation channel subfamily V member 1)         |
| KY.Chr4.411                        | R/P                                                        | KY.Chr4.411.v1.nonSL9-1 | 3.33E-107 | P51159 | RAB27A (RAB27A member RAS oncogene family)                                       |
| KY.Chr4.412                        | R/P                                                        | KY.Chr4.412.v1.nonSL6-1 | 4.07E-155 | P23229 | ITGA6 (integrin subunit alpha 6)                                                 |
| KY.Chr4.413                        | R/P                                                        | KY.Chr4.413.v1.ND1-1    | 1.6       | Q9UGJ1 | TUBGPC4 (tubulin gamma complex associated protein 4)                             |
| KY.Chr4.414                        | R/P                                                        | KY.Chr4.414.v1.ND1-2    | 4.8       | O43909 | EXTL3 (exostosin like glycosyltransferase 3)                                     |
| KY.Chr4.415<br>( <i>ErfA</i> )     | R/P                                                        | KY.Chr4.415.v1.ND1-1    | 6.09E-25  | P50548 | ERF (ETS2 repressor factor)                                                      |
| KY.Chr4.416                        | R/P                                                        | KY.Chr4.416.v1.ND1-1    | 0.4       | Q14517 | FAT1 (FAT atypical cadherin 1)                                                   |
| KY.Chr4.417                        | R/P                                                        |                         |           |        | no significant match found                                                       |
| KY.Chr4.418                        | R/P                                                        | KY.Chr4.418.v2.SL1-2    | 0.016     | P25940 | COL5A3 (collagen type V alpha 3 chain)                                           |
| KY.Chr4.419                        | R/P                                                        | KY.Chr4.419.v1.ND1-1    | 7.96E-28  | Q9UL12 | SARDH (sarcosine dehydrogenase)                                                  |
| KY.Chr4.420                        | R/P                                                        | KY.Chr4.420.v1.SL3-1    | 7.00E-82  | Q08623 | PUDP (pseudouridine 5'-phosphatase)                                              |
| KY.Chr4.421                        | R/P                                                        | KY.Chr4.421.v1.SL1-1    | 0         | Q9UL12 | SARDH (sarcosine dehydrogenase)                                                  |
| KY.Chr4.422                        | R/P                                                        | KY.Chr4.422.v1.ND1-1    | 1.5       | Q9UL12 | SARDH (sarcosine dehydrogenase)                                                  |
| KY.Chr4.423                        | R/P                                                        | KY.Chr4.423.v1.nonSL5-1 | 1.62E-55  | Q96CG8 | CTHRC1 (cthr1 triple helix repeat containing 1)                                  |
| KY.Chr4.424                        | R/P                                                        | KY.Chr4.424.v2.ND3-1    | 6.46E-100 | O95571 | ETHE1 (ETHE1 persulfide dioxygenase)                                             |
| KY.Chr4.425                        | R/P                                                        | KY.Chr4.425.v2.SL18-3   | 4.95E-158 | Q8NBT3 | TMEM145 (transmembrane protein 145)                                              |
| KY.Chr4.426                        | R/P                                                        | KY.Chr4.426.v1.SL2-1    | 0         | Q7ZGZ7 | HUWE1 (HECT UBA and WWE domain containing 1 E3 ubiquitin protein ligase)         |
| KY.Chr4.427                        | R/P                                                        | KY.Chr4.427.v1.ND1-1    | 0.54      | Q709F0 | ACAD11 (acyl-CoA dehydrogenase family member 11)                                 |
| KY.Chr4.428                        | R/P                                                        | KY.Chr4.428.v1.SL2-1    | 6.03E-180 | Q9BRS2 | RIOK1 (RIO kinase 1)                                                             |
| KY.Chr4.429                        | R/P                                                        | KY.Chr4.429.v1.ND1-1    | 4.51E-26  | Q6PJT7 | ZC3H14 (zinc finger CCCH-type containing 14)                                     |
| KY.Chr4.430                        | R/P                                                        | KY.Chr4.430.v1.SL3-1    | 5.06E-45  | Q9BSG0 | PRADC1 (protease associated domain containing 1)                                 |
| KY.Chr4.431                        | R/P                                                        | KY.Chr4.431.v1.ND1-1    | 0         | Q13936 | CACNA1C (calcium voltage-gated channel subunit alpha 1 C)                        |
| KY.Chr4.432                        | R/P                                                        | KY.Chr4.432.v1.ND1-1    | 1.5       | O20283 | NAAA (N-acyl ethanolamine acid amidase)                                          |
| KY.Chr4.433                        | R/P                                                        | KY.Chr4.433.v7.ND2-5    | 0.088     | Q9H1D0 | TRPV6 (transient receptor potential cation channel subfamily V member 6)         |
| KY.Chr4.434                        | R/P                                                        | KY.Chr4.434.v1.ND1-1    | 1.92E-13  | Q7Z4M0 | REC114 (REC114 meiotic recombination protein)                                    |
| KY.Chr4.435                        | R/P                                                        | KY.Chr4.435.v1.SL1-1    | 4.89E-29  | O43603 | GALR2 (galanin receptor 2)                                                       |
| KY.Chr4.436                        | R/P                                                        | KY.Chr4.436.v1.ND1-1    | 0.19      | Q9NYF0 | DACT1 (dishevelled binding antagonist of beta catenin 1)                         |
| KY.Chr4.437                        | R/P                                                        | KY.Chr4.437.v2.SL3-1    | 0         | P20807 | CAPN3 (calpain 3)                                                                |
| KY.Chr4.438                        | R/P                                                        | KY.Chr4.438.v1.SL1-1    | 0.15      | P43359 | MAGEA5 (MAGE family member A5)                                                   |
| KY.Chr4.439                        | R/P                                                        | KY.Chr4.439.v1.nonSL9-1 | 0.18      | Q5TYX0 | PRAMEF5 (PRAME family member 5)                                                  |
| KY.Chr4.440                        | R/P                                                        | KY.Chr4.440.v1.nonSL1-1 | 1.18E-54  | Q8N309 | LRRC43 (leucine rich repeat containing 43)                                       |
| KY.Chr4.441                        | R/P                                                        | KY.Chr4.441.v1.SL2-1    | 0.85      | Q7Z7G8 | VPS13B (vacuolar protein sorting 13 homolog B)                                   |
| KY.Chr4.442                        | R/P                                                        | KY.Chr4.442.v1.nonSL2-1 | 1.76E-39  | Q4LDE5 | SVEP1 (sushi von Willebrand factor type A EGF and pentraxin domain containing 1) |
| KY.Chr4.443                        | R/P                                                        | KY.Chr4.443.v1.ND1-1    | 2.9       | O60469 | DSCAM (DS cell adhesion molecule)                                                |
| KY.Chr4.444                        | R/P                                                        | KY.Chr4.444.v1.nonSL3-1 | 3.93E-74  | Q4LDE5 | SVEP1 (sushi von Willebrand factor type A EGF and pentraxin domain containing 1) |
| KY.Chr4.445                        | R/P                                                        | KY.Chr4.445.v1.SL1-1    | 0         | O15439 | ABCC4 (ATP binding cassette subfamily C member 4)                                |
| KY.Chr4.446                        | R/P                                                        | KY.Chr4.446.v1.SL2-1    | 1.13E-149 | Q9UJM8 | HAO1 (hydroxyacid oxidase 1)                                                     |
| KY.Chr4.447                        | R/P                                                        | KY.Chr4.447.v1.nonSL1-1 | 2.7       | Q9HCH5 | SYTL2 (synaptotagmin like 2)                                                     |
| KY.Chr4.448                        | R/P                                                        | KY.Chr4.448.v1.nonSL1-1 | 0.3       | Q9UL01 | DSE (dermatan sulfate epimerase)                                                 |
| KY.Chr4.449<br>( <i>Bmp2/4</i> )   | R/P                                                        | KY.Chr4.449.v4.ND4-1    | 9.67E-122 | P12643 | BMP2 (bone morphogenetic protein 2)                                              |
| KY.Chr4.450<br>( <i>Gdf1/3-r</i> ) | R/P                                                        | KY.Chr4.450.v1.ND1-1    | 4.58E-41  | P12644 | BMP4 (bone morphogenetic protein 4)                                              |
| KY.Chr4.451                        | R/P                                                        | KY.Chr4.451.v1.ND1-1    | 0.81      | A6PVS8 | LRR1Q3 (leucine rich repeats and IQ motif containing 3)                          |
| KY.Chr4.452                        | R/P                                                        | KY.Chr4.452.v1.ND1-1    | 1.57E-31  | Q969H0 | FBXW7 (F-box and WD repeat domain containing 7)                                  |
| KY.Chr4.453                        | R/P                                                        | KY.Chr4.453.v2.ND2-2    | 2.49E-24  | Q9P2E3 | ZNFX1 (zinc finger NFX1-type containing 1)                                       |
| KY.Chr4.454                        | R/P                                                        | KY.Chr4.454.v1.ND1-1    | 0         | Q9P2E3 | ZNFX1 (zinc finger NFX1-type containing 1)                                       |
| KY.Chr5.25                         | R/P                                                        | KY.Chr5.25.v1.SL1-1     | 7.74E-23  | Q6P2S7 | TTC41P (tetrapeptide repeat domain 41, pseudogene)                               |
| KY.Chr5.26                         | R/P                                                        | KY.Chr5.26.v1.ND1-1     | 5.42E-14  | A6NKG5 | RTL1 (retrotransposon Gag like 1)                                                |
| KY.Chr5.27                         | R/P                                                        | KY.Chr5.27.v2.ND1-1     | 0.14      | Q9NY10 | PSD3 (pleckstrin and Sec7 domain containing 3)                                   |
| KY.Chr5.28                         | R/P                                                        | KY.Chr5.28.v1.SL1-1     | 3.85E-42  | Q8TC57 | M1AP (meiosis 1 associated protein)                                              |
| KY.Chr5.265                        | R/P                                                        | KY.Chr5.265.v1.SL1-1    | 1.36E-09  | Q86X45 | LRRC6 (leucine rich repeat containing 6)                                         |
| KY.Chr5.266                        | R/P                                                        | KY.Chr5.266.v1.SL1-1    | 5.7       | Q14643 | ITPR1 (inositol 1 4 5-trisphosphate receptor type 1)                             |
| KY.Chr5.267                        | R/P                                                        | KY.Chr5.267.v1.SL3-1    | 0         | O15042 | U2SURP (U2 snRNP associated SURP domain containing)                              |
| KY.Chr5.268                        | R/P                                                        | KY.Chr5.268.v2.nonSL1-1 | 1.25E-63  | Q8NCA5 | FAM98A (family with sequence similarity 98 member A)                             |
| KY.Chr5.269                        | (R/P) (this model was not mapped to the specimen R genome) | KY.Chr5.269.v1.ND1-1    | 4.48E-75  | Q9Y226 | SLC22A13 (solute carrier family 22 member 13)                                    |
| KY.Chr5.270                        | (R/P) (this model was not mapped to the specimen R genome) | KY.Chr5.270.v1.ND1-1    | 8.70E-01  | Q8IXQ6 | PARP9 (poly(ADP-ribose) polymerase family member 9)                              |
| KY.Chr5.271                        | (R/P) (this model was not mapped to the specimen R genome) | KY.Chr5.271.v2.ND2-1    | 5.00E+00  | Q13698 | CACNAIS (calcium voltage-gated channel subunit alpha 1 S)                        |
| KY.Chr5.272                        | (R/P) (this model was not mapped to the specimen R genome) | KY.Chr5.272.v1.ND1-1    | 5.60E-01  | P62191 | PSMC1 (proteasome 26S subunit, ATPase 1)                                         |
| KY.Chr6.38                         | P                                                          | KY.Chr6.38.v3.ND1-3     | 8.06E-130 | Q00534 | CDK6 (cyclin dependent kinase 6)                                                 |
| KY.Chr6.39                         | P                                                          | KY.Chr6.39.v1.nonSL1-1  | 1.20E-151 | P55157 | MTPP (microsomal triglyceride transfer protein)                                  |
| KY.Chr6.40                         | P                                                          | KY.Chr6.40.v2.nonSL9-1  | 1.79E-106 | Q13126 | MTAP (methylthioadenosine phosphorylase)                                         |
| KY.Chr6.41                         | P                                                          | KY.Chr6.41.v2.SL1-2     | 3.85E-18  | P56470 | LGALS4 (galectin 4)                                                              |
| KY.Chr6.42                         | P                                                          |                         |           |        | no significant match found                                                       |
| KY.Chr6.43                         | P                                                          | KY.Chr6.43.v3.nonSL2-2  | 1.72E-31  | P56470 | LGALS4 (galectin 4)                                                              |
| KY.Chr6.44                         | P                                                          | KY.Chr6.44.v1.SL1-1     | 0.4       | Q81Y21 | DDX60 (DEAD/H-box helicase 60)                                                   |
| KY.Chr6.45                         | P                                                          | KY.Chr6.45.v1.SL1-2     | 5.47E-43  | Q641Q2 | WASHC2A (WASH complex subunit 2A)                                                |
| KY.Chr6.59                         | R                                                          | KY.Chr6.59.v2.SL2-1     | 2.82E-162 | Q5SZQ8 | CELF3 (CUGBP Elav-like family member 3)                                          |
| KY.Chr6.60                         | R                                                          | KY.Chr6.60.v1.ND1-1     | 1.76E-66  | Q9NQB0 | TCF7L2 (transcription factor 7 like 2)                                           |
| KY.Chr6.61                         | R                                                          | KY.Chr6.61.v1.ND1-1     | 6.2       | P51170 | SCNN1G (sodium channel epithelial 1 gamma subunit)                               |
| KY.Chr6.62                         | R                                                          | KY.Chr6.62.v1.ND1-1     | 5.9       | Q8TDV2 | GPR148 (G protein-coupled receptor 148)                                          |
| KY.Chr6.63                         | R                                                          | KY.Chr6.63.v1.nonSL2-1  | 1.07E-53  | Q16514 | TAF12 (TATA-box binding protein associated factor 12)                            |
| KY.Chr6.64                         | R                                                          | KY.Chr6.64.v1.ND1-1     | 0.08      | Q9NYF8 | BCLAF1 (BCL2 associated transcription factor 1)                                  |
| KY.Chr6.65                         | R                                                          | KY.Chr6.65.v1.ND1-1     | 4.6       | P13797 | PLS3 (plastin 3)                                                                 |
| KY.Chr6.66                         | R                                                          | KY.Chr6.66.v2.ND2-1     | 0.73      | O60271 | SPAG9 (sperm associated antigen 9)                                               |
| KY.Chr6.67                         | R                                                          | KY.Chr6.67.v1.ND1-1     | 5.1       | Q9C0F0 | ASXL3 (ASXL transcriptional regulator 3)                                         |
| KY.Chr6.68                         | R                                                          | KY.Chr6.68.v5.nonSL9-1  | 3.27E-75  | O75899 | GABBR2 (gamma-aminobutyric acid type B receptor subunit 2)                       |
| KY.Chr6.69                         | R                                                          | KY.Chr6.69.v1.ND1-1     | 0.002     | P18583 | SON (SON DNA binding protein)                                                    |
| KY.Chr6.70                         | R                                                          | KY.Chr6.70.v1.SL1-1     | 0.001     | P62079 | TSPAN5 (tetraspanin 5)                                                           |
| KY.Chr6.71                         | R                                                          | KY.Chr6.71.v1.SL1-1     | 2.06E-49  | Q9H3S4 | TPK1 (thiamin pyrophosphokinase 1)                                               |
| KY.Chr6.72                         | R                                                          | KY.Chr6.72.v1.nonSL4-1  | 2.21E-27  | Q9H3S4 | TPK1 (thiamin pyrophosphokinase 1)                                               |
| KY.Chr6.73                         | R                                                          | KY.Chr6.73.v4.SL1-3     | 7.92E-16  | Q5JXM2 | METTL24 (methyltransferase like 24)                                              |
| KY.Chr6.75                         | R                                                          | KY.Chr6.75.v1.ND1-2     | 0.93      | Q8WXI7 | MUC16 (mucin 16 cell surface associated)                                         |

|             |   |                         |           |        |                                                                              |
|-------------|---|-------------------------|-----------|--------|------------------------------------------------------------------------------|
| KY.Chr6.76  | R | KY.Chr6.76.v2.nonSL3-2  | 2.94E-19  | Q96RW7 | HMCN1 (hemicentin 1)                                                         |
| KY.Chr6.77  | R | KY.Chr6.77.v1.ND1-3     | 2.05E-19  | Q96RW7 | HMCN1 (hemicentin 1)                                                         |
| KY.Chr6.78  | R | KY.Chr6.78.v1.ND1-1     | 0.43      | O75943 | RAD17 (RAD17 checkpoint clamp loader component)                              |
| KY.Chr6.79  | R | KY.Chr6.79.v1.ND1-1     | 1.8       | Q99623 | PHB2 (prohibitin 2)                                                          |
| KY.Chr6.80  | R | KY.Chr6.80.v1.ND1-1     | 1.58E-18  | Q96RW7 | HMCN1 (hemicentin 1)                                                         |
| KY.Chr6.81  | R | KY.Chr6.81.v1.ND1-1     | 6.79E-20  | O60241 | ADGRB2 (adhesion G protein-coupled receptor B2)                              |
| KY.Chr6.82  | R | KY.Chr6.82.v2.SL3-2     | 0.12      | Q86Y13 | DZIP3 (DAZ interacting zinc finger protein 3)                                |
| KY.Chr6.83  | R | KY.Chr6.83.v1.SL2-1     | 1.49E-49  | Q9NXU5 | ARL15 (ADP ribosylation factor like GTPase 15)                               |
| KY.Chr6.84  | R | KY.Chr6.84.v1.SL1-1     | 1.75E-92  | Q7L210 | MEPCE (methylphosphate capping enzyme)                                       |
| KY.Chr6.85  | R | KY.Chr6.85.v1.ND1-1     | 0.07      | Q14896 | MYBPC3 (myosin binding protein C cardiac)                                    |
| KY.Chr6.86  | R | KY.Chr6.86.v1.ND1-1     | 1.11E-13  | Q6ZRI0 | OTOG (stogelin)                                                              |
| KY.Chr6.87  | R | KY.Chr6.87.v1.ND1-1     | 0         | P04275 | VWF (von Willebrand factor)                                                  |
| KY.Chr6.88  | R | KY.Chr6.88.v1.ND1-1     | 0.58      | A0ZSE6 | TMEM30CP (transmembrane protein 30C pseudogene)                              |
| KY.Chr6.89  | R | KY.Chr6.89.v1.nonSL5-1  | 2.20E-108 | P50416 | CPT1A (carnitine palmitoyltransferase 1A)                                    |
| KY.Chr6.90  | R | KY.Chr6.90.v1.SL5-1     | 0.28      | P33151 | CDH5 (cadherin 5)                                                            |
| KY.Chr6.91  | R | KY.Chr6.91.v3.nonSL12-2 | 9.20E-44  | O43617 | TRAPP3 (trafficking protein particle complex 3)                              |
| KY.Chr6.92  | R | KY.Chr6.92.v1.nonSL1-1  | 0         | Q7Z6B7 | SRGAP1 (SLIT-ROBO Rho GTPase activating protein 1)                           |
| KY.Chr6.93  | R | KY.Chr6.93.v1.ND1-1     | 1.7       | O75800 | ZMYND10 (zinc finger MYND-type containing 10)                                |
| KY.Chr6.94  | R | KY.Chr6.94.v1.nonSL3-1  | 2.70E-163 | O60733 | PLA2G6 (phospholipase A2 group VI)                                           |
| KY.Chr6.95  | R | KY.Chr6.95.v1.nonSL6-1  | 1.58E-06  | P82914 | MRPS15 (mitochondrial ribosomal protein S15)                                 |
| KY.Chr6.96  | R | KY.Chr6.96.v2.SL1-2     | 2.78E-37  | P49406 | MRPL19 (mitochondrial ribosomal protein L19)                                 |
| KY.Chr6.97  | R | KY.Chr6.97.v1.SL1-1     | 0         | Q9NUB1 | ACSS1 (acyl-CoA synthetase short chain family member 1)                      |
| KY.Chr6.98  | R | KY.Chr6.98.v1.SL2-1     | 1.53E-112 | O95905 | ECD (ecdysoneless cell cycle regulator)                                      |
| KY.Chr6.99  | R | KY.Chr6.99.v1.SL1-1     | 2.02E-71  | Q53G59 | KLHL12 (kelch like family member 12)                                         |
| KY.Chr6.100 | R | KY.Chr6.100.v1.ND1-1    | 2.16E-68  | Q53G59 | KLHL12 (kelch like family member 12)                                         |
| KY.Chr6.101 | R | KY.Chr6.101.v1.ND1-1    | 0.51      | Q9UBU6 | FAM8A1 (family with sequence similarity 8 member A1)                         |
| KY.Chr6.102 | R | KY.Chr6.102.v2.ND1-2    | 2.22E-33  | Q53G59 | KLHL12 (kelch like family member 12)                                         |
| KY.Chr7.593 | R | KY.Chr7.593.v1.nonSL1-1 | 0.044     | P13611 | VCAN (versican)                                                              |
| KY.Chr7.594 | R | KY.Chr7.594.v1.SL5-1    | 1.58E-116 | Q8WYN0 | ATG4A (autophagy related 4A cysteine peptidase)                              |
| KY.Chr7.595 | R | KY.Chr7.595.v1.ND1-1    | 0.16      | Q9BS86 | ZBPB (zona pellucida binding protein)                                        |
| KY.Chr7.596 | R | KY.Chr7.596.v1.SL9-4    | 5.1       | Q15034 | HERC3 (HECT and RLD domain containing E3 ubiquitin protein ligase 3)         |
| KY.Chr7.597 | R | KY.Chr7.597.v1.SL4-1    | 1.2       | O00634 | NTN3 (netrin 3)                                                              |
| KY.Chr7.598 | R | KY.Chr7.598.v1.ND1-1    | 0.15      | Q92576 | PHF3 (PHD finger protein 3)                                                  |
| KY.Chr7.599 | R | KY.Chr7.599.v2.SL2-1    | 8.12E-131 | Q9Y305 | ACOT9 (acyl-CoA thioesterase 9)                                              |
| KY.Chr7.600 | R | KY.Chr7.600.v2.SL3-3    | 2.67E-73  | P23919 | DTYMK (deoxythymidylate kinase)                                              |
| KY.Chr7.601 | R | KY.Chr7.601.v3.SL2-2    | 4.70E-05  | Q8NGP4 | OR5M3 (olfactory receptor family 5 subfamily M member 3)                     |
| KY.Chr7.602 | R | KY.Chr7.602.v1.ND1-1    | 0.34      | Q8NAV2 | Csorf58 (chromosome 8 open reading frame 58)                                 |
| KY.Chr7.603 | R | KY.Chr7.603.v1.SL3-1    | 2.17E-18  | Q8NG65 | CSGALNACT2 (chondroitin sulfate N-acetylgalactosaminyltransferase 2)         |
| KY.Chr7.604 | R | KY.Chr7.604.v1.ND1-1    | 0.3       | Q155Q3 | DIXDC1 (DIX domain containing 1)                                             |
| KY.Chr7.605 | R | KY.Chr7.605.v1.ND1-2    | 4.6       | Q7Z3K3 | POGZ (pogo transposable element derived with ZNF domain)                     |
| KY.Chr7.606 | R | KY.Chr7.606.v1.ND1-1    | 2.16E-18  | Q9NR99 | MXRA5 (matrix remodeling associated 5)                                       |
| KY.Chr7.607 | R | KY.Chr7.607.v1.SL3-1    | 1.04E-22  | O94933 | SLITRK3 (SLIT and NTRK like family member 3)                                 |
| KY.Chr7.608 | R | KY.Chr7.608.v1.ND1-1    | 4.92E-30  | Q8N137 | CNTR0B (centrobin centriole duplication and spindle assembly protein)        |
| KY.Chr7.609 | R | KY.Chr7.609.v2.SL6-4    | 1.43E-148 | O60678 | PRMT3 (protein arginine methyltransferase 3)                                 |
| KY.Chr7.610 | R | KY.Chr7.610.v1.nonSL4-1 | 0.028     | Q96Q27 | ASB2 (ankyrin repeat and SOCS box containing 2)                              |
| KY.Chr7.611 | R | KY.Chr7.611.v1.SL1-1    | 5.36E-136 | P57076 | CFAP298 (cilia and flagella associated protein 298)                          |
| KY.Chr7.612 | R | KY.Chr7.612.v1.ND1-1    | 9.42E-19  | Q496A3 | SPATS1 (spermatogenesis associated serine rich 1)                            |
| KY.Chr7.613 | R | KY.Chr7.613.v1.ND1-1    | 0         | Q8N136 | DAWI (dynein assembly factor with WD repeats 1)                              |
| KY.Chr7.614 | R | KY.Chr7.614.v1.SL1-1    | 0         | O94788 | ALDH1A2 (aldehyde dehydrogenase 1 family member A2)                          |
| KY.Chr7.615 | R | KY.Chr7.615.v1.ND1-1    | 1.2       | P57071 | PRDM15 (PR-SET domain 15)                                                    |
| KY.Chr7.616 | R | KY.Chr7.616.v1.SL1-1    | 0         | O94788 | ALDH1A2 (aldehyde dehydrogenase 1 family member A2)                          |
| KY.Chr7.617 | R | KY.Chr7.617.v1.ND1-1    | 1.52E-151 | O94788 | ALDH1A2 (aldehyde dehydrogenase 1 family member A2)                          |
| KY.Chr7.618 | R | KY.Chr7.618.v1.SL1-1    | 0         | O43451 | MGAM (maltase-glucoamylase)                                                  |
| KY.Chr7.619 | R | KY.Chr7.619.v1.ND1-1    | 0         | Q96RP9 | GFM1 (G elongation factor mitochondrial 1)                                   |
| KY.Chr7.620 | R | KY.Chr7.620.v1.nonSL1-1 | 1.1       | Q14957 | GRIN2C (glutamate ionotropic receptor NMDA type subunit 2C)                  |
| KY.Chr7.621 | R |                         |           |        | no significant match found                                                   |
| KY.Chr7.622 | R | KY.Chr7.622.v1.nonSL9-1 | 0.17      | Q9P2K8 | EIF2AK4 (eukaryotic translation initiation factor 2 alpha kinase 4)          |
| KY.Chr7.623 | R | KY.Chr7.623.v1.ND1-1    | 0.96      | O14782 | KIF3C (kinesin family member 3C)                                             |
| KY.Chr7.624 | R | KY.Chr7.624.v2.ND2-1    | 6.4       | Q8NBJ9 | SIDT2 (SID1 transmembrane family member 2)                                   |
| KY.Chr7.625 | R | KY.Chr7.625.v2.SL4-4    | 0         | P05166 | PCCB (propionyl-CoA carboxylase subunit beta)                                |
| KY.Chr7.626 | R | KY.Chr7.626.v1.nonSL6-1 | 8.30E-39  | Q9NZ42 | PSENE1 (presenilin enhancer gamma-secretase subunit)                         |
| KY.Chr7.627 | R | KY.Chr7.627.v1.SL1-1    | 3.73E-17  | Q9Y5U9 | IERSIP1 (immediate early response 3 interacting protein 1)                   |
| KY.Chr7.628 | R | KY.Chr7.628.v1.nonSL1-1 | 1.49E-104 | Q9H3K2 | GHTIM (growth hormone inducible transmembrane protein)                       |
| KY.Chr7.629 | R | KY.Chr7.629.v1.nonSL4-1 | 1.53E-177 | Q5JVF3 | PCID2 (PCI domain containing 2)                                              |
| KY.Chr7.630 | R | KY.Chr7.630.v1.nonSL4-1 | 1.19E-56  | Q8WV35 | TCTEXID2 (Tetex1 domain containing 2)                                        |
| KY.Chr7.631 | R | KY.Chr7.631.v2.SL2-2    | 0.45      | A0PJX4 | SHISA3 (shiisa family member 3)                                              |
| KY.Chr7.632 | R | KY.Chr7.632.v1.SL2-1    | 1.32E-108 | P17706 | PTPN2 (protein tyrosine phosphatase non-receptor type 2)                     |
| KY.Chr7.633 | R | KY.Chr7.633.v1.ND1-1    | 5.2       | Q5VWK5 | IL23R (interleukin 23 receptor)                                              |
| KY.Chr7.634 | R | KY.Chr7.634.v1.SL1-1    | 1.80E-10  | Q9NQ78 | KIF13B (kinesin family member 13B)                                           |
| KY.Chr7.635 | R | KY.Chr7.635.v1.SL1-1    | 1.61E-72  | Q9BUL8 | PDCD10 (programmed cell death 10)                                            |
| KY.Chr7.636 | R | KY.Chr7.636.v2.SL2-1    | 6.38E-13  | Q9UMX3 | BOK (BCL2 family apoptosis regulator BOK)                                    |
| KY.Chr7.637 | R | KY.Chr7.637.v1.SL4-1    | 2.91E-111 | Q9NVU0 | POLR3E (RNA polymerase III subunit E)                                        |
| KY.Chr7.638 | R | KY.Chr7.638.v2.ND3-1    | 8.52E-13  | P54368 | OAZ1 (ornithine decarboxylase antizyme 1)                                    |
| KY.Chr7.639 | R | KY.Chr7.639.v1.nonSL1-1 | 5.11E-48  | Q7Z407 | CSMD3 (CUB and Sushi multiple domains 3)                                     |
| KY.Chr7.640 | R | KY.Chr7.640.v1.nonSL3-1 | 3.46E-06  | P54852 | EMP3 (epithelial membrane protein 3)                                         |
| KY.Chr7.641 | R | KY.Chr7.641.v1.SL1-1    | 0         | Q9P210 | CPSP2 (cleavage and polyadenylation specific factor 2)                       |
| KY.Chr7.642 | R | KY.Chr7.642.v2.SL1-3    | 1.16E-18  | P08174 | CD55 (CD55 molecule (Cromer blood group))                                    |
| KY.Chr7.643 | R | KY.Chr7.643.v1.SL4-1    | 2.87E-178 | Q9UH17 | SLC23A1 (solute carrier family 23 member 1)                                  |
| KY.Chr7.644 | R | KY.Chr7.644.v1.SL1-1    | 2.10E-53  | Q9H418 | SERHL2 (serine hydrolase like 2)                                             |
| KY.Chr7.645 | R | KY.Chr7.645.v1.SL1-1    | 5.01E-46  | Q9H418 | SERHL2 (serine hydrolase like 2)                                             |
| KY.Chr7.646 | R | KY.Chr7.646.v1.nonSL4-1 | 4.28E-28  | Q8WZA0 | LZIC (leucine zipper and CTNNBIP1 domain containing)                         |
| KY.Chr7.647 | R | KY.Chr7.647.v1.ND1-1    | 0.53      | P05129 | PRKCG (protein kinase C gamma)                                               |
| KY.Chr7.648 | R | KY.Chr7.648.v1.ND1-2    | 3.56E-118 | Q8WVP7 | LMBR1 (limb development membrane protein 1)                                  |
| KY.Chr7.649 | R | KY.Chr7.649.v1.nonSL8-1 | 0.74      | Q9C0B5 | ZDHHC5 (zinc finger DHHC-type containing 5)                                  |
| KY.Chr7.650 | R | KY.Chr7.650.v1.ND1-1    | 0.29      | Q9UMX0 | UBQLN1 (ubiquilin 1)                                                         |
| KY.Chr7.651 | R | KY.Chr7.651.v1.nonSL1-3 | 0         | P24928 | POLR2A (RNA polymerase II subunit A)                                         |
| KY.Chr7.652 | R | KY.Chr7.652.v1.nonSL1-1 | 1.2       | Q03111 | MLLT1 (MLLT1 super elongation complex subunit)                               |
| KY.Chr7.653 | R | KY.Chr7.653.v1.SL2-1    | 1.01E-103 | A0INW5 | UHRF1BP1 (UHRF1 binding protein 1 like)                                      |
| KY.Chr7.654 | R | KY.Chr7.654.v1.ND1-1    | 8.15E-45  | Q9H9Y4 | GNP2 (GNP-loop GTPase 2)                                                     |
| KY.Chr7.655 | R | KY.Chr7.655.v3.ND3-3    | 1.16E-129 | Q9H9Y4 | GNP2 (GNP-loop GTPase 2)                                                     |
| KY.Chr7.658 | R | KY.Chr7.658.v6.SL5-5    | 2.82E-67  | Q9UBS9 | SUCO (SUN domain containing ossification factor)                             |
| KY.Chr7.659 | R | KY.Chr7.659.v1.SL2-1    | 6.53E-33  | Q06945 | SOX4 (SRY-box 4)                                                             |
| KY.Chr7.660 | R | KY.Chr7.660.v1.nonSL1-1 | 0         | Q92626 | PXDN (peroxidase)                                                            |
| KY.Chr7.661 | R | KY.Chr7.661.v2.SL4-4    | 0.56      | Q9Y3D2 | MSRB2 (methionine sulfoxide reductase B2)                                    |
| KY.Chr7.662 | R | KY.Chr7.662.v2.SL3-3    | 0         | Q9HCS7 | XAB2 (XPA binding protein 2)                                                 |
| KY.Chr7.663 | R | KY.Chr7.663.v2.SL26-1   | 4.82E-29  | O15212 | PFND6 (prefoldin subunit 6)                                                  |
| KY.Chr7.665 | R | KY.Chr7.665.v1.SL1-1    | 1.97E-41  | P0DP23 | CALM1 (calmodulin 1)                                                         |
| KY.Chr7.666 | R | KY.Chr7.666.v1.ND1-1    | 2.55E-05  | Q8N7Z5 | ANKRD31 (ankyrin repeat domain 31)                                           |
| KY.Chr7.667 | R | KY.Chr7.667.v1.SL1-1    | 2.29E-17  | P22674 | CCNO (cyclin O)                                                              |
| KY.Chr7.668 | R |                         |           |        | no significant match found                                                   |
| KY.Chr7.669 | R | KY.Chr7.669.v1.nonSL5-1 | 0         | O75191 | XYLB (xylulokinase)                                                          |
| KY.Chr7.670 | R | KY.Chr7.670.v2.ND1-2    | 2.5       | Q7Z317 | ZNF572 (zinc finger protein 572)                                             |
| KY.Chr7.671 | R | KY.Chr7.671.v1.ND1-1    | 5.24E-18  | Q01484 | ANK2 (ankyrin 2)                                                             |
| KY.Chr7.672 | R | KY.Chr7.672.v1.ND1-1    | 6.15E-37  | Q96ER3 | SAAL1 (serum amyloid A like 1)                                               |
| KY.Chr7.673 | R | KY.Chr7.673.v2.nonSL8-2 | 6.83E-05  | Q96MW1 | CCDC43 (coiled-coil domain containing 43)                                    |
| KY.Chr7.674 | R | KY.Chr7.674.v1.ND1-1    | 1.26E-38  | A2RUB1 | MEIOC (meiosis specific with coiled-coil domain)                             |
| KY.Chr7.675 | R | KY.Chr7.675.v1.SL2-1    | 1.8       | Q9NXG6 | P4HTM (poly(4-hydroxy)lase transmembrane)                                    |
| KY.Chr7.676 | R | KY.Chr7.676.v4.SL3-2    | 3.85E-65  | O60583 | CCNT2 (cyclin T2)                                                            |
| KY.Chr7.677 | R | KY.Chr7.677.v1.SL4-1    | 1.45E-84  | Q7Z429 | GRINA (glutamate ionotropic receptor NMDA type subunit associated protein 1) |
| KY.Chr7.678 | R | KY.Chr7.678.v1.nonSL4-1 | 6.34E-06  | Q86Y26 | MIB1 (mindbomb E3 ubiquitin protein ligase 1)                                |
| KY.Chr7.679 | R | KY.Chr7.679.v1.ND1-1    | 8.04E-39  | Q14554 | PDIA5 (protein disulfide isomerase family A member 5)                        |
| KY.Chr7.680 | R | KY.Chr7.680.v2.SL3-1    | 0.002     | Q14554 | PDIA5 (protein disulfide isomerase family A member 5)                        |
| KY.Chr7.681 | R | KY.Chr7.681.v1.ND1-1    | 2.32E-141 | Q14554 | PDIA5 (protein disulfide isomerase family A member 5)                        |
| KY.Chr7.682 | R | KY.Chr7.682.v1.SL1-1    | 9.91E-91  | Q6UWV6 | ENPP7 (ectonucleotide pyrophosphatase/phosphodiesterase 7)                   |
| KY.Chr7.683 | R | KY.Chr7.683.v1.nonSL8-1 | 1.38E-64  | Q96E52 | OMA1 (OMA1 zinc metallopeptidase)                                            |
| KY.Chr7.684 | R | KY.Chr7.684.v1.SL1-1    | 1.20E-71  | O75391 | SPAG7 (sperm associated antigen 7)                                           |

|                        |     |                         |           |         |                                                                                  |
|------------------------|-----|-------------------------|-----------|---------|----------------------------------------------------------------------------------|
| KY.Chr7.685            | R   | KY.Chr7.685.v1.ND1-1    | 0         | P51797  | CLCN6 (chloride voltage-gated channel 6)                                         |
| KY.Chr7.686            | R   | KY.Chr7.686.v1.SL2-1    | 0.6       | Q8NI32  | LYPD6B (LY6/PLAUR domain containing 6B)                                          |
| KY.Chr7.687            | R   | KY.Chr7.687.v1.ND1-1    | 0.23      | Q86W11  | PKHD1L1 (PKHD1 like 1)                                                           |
| KY.Chr7.688            | R   | KY.Chr7.688.v2.ND2-1    | 3.98E-34  | Q9BQR3  | PRSS27 (serine protease 27)                                                      |
| KY.Chr7.689            | R   | KY.Chr7.689.v1.nonSL6-1 | 2.5       | A6NM11  | LRRC37A2 (leucine rich repeat containing 37 member A2)                           |
| KY.Chr7.690            | R   | KY.Chr7.690.v1.SL2-1    | 2.2       | Q16853  | AOC3 (amine oxidase copper containing 3)                                         |
| KY.Chr7.691            | R   | KY.Chr7.691.v1.SL1-1    | 1.68E-103 | Q9BU14  | POLR3C (RNA polymerase III subunit C)                                            |
| KY.Chr7.692            | R   | KY.Chr7.692.v1.SL1-1    | 3.57E-17  | Q9NUP1  | BLOC1S4 (biogenesis of lysosomal organelles complex 1 subunit 4)                 |
| KY.Chr7.693            | R   | KY.Chr7.693.v1.SL1-1    | 4.55E-64  | Q8N9V3  | WDSUB1 (WD repeat sterile alpha motif and U-box domain containing 1)             |
| KY.Chr7.694            | R   | KY.Chr7.694.v1.SL2-1    | 4.46E-114 | Q9NRA2  | SLC17A5 (solute carrier family 17 member 5)                                      |
| KY.Chr7.695            | R   | KY.Chr7.695.v2.ND2-2    | 2.32E-18  | P16109  | SELP (selectin P)                                                                |
| KY.Chr7.696            | R   | KY.Chr7.696.v1.nonSL1-1 | 4.40E-116 | Q9HCS2  | CYP4F12 (cytochrome P450 family 4 subfamily F member 12)                         |
| KY.Chr7.697            | R   | KY.Chr7.697.v1.nonSL3-1 | 0.01      | Q4LDE5  | SVEP1 (sushi von Willebrand factor type A EGF and pentraxin domain containing 1) |
| KY.Chr7.698            | R   | KY.Chr7.698.v1.SL1-1    | 0         | Q9CZS0  | DNAI2 (dynein axonemal intermediate chain 2)                                     |
| KY.Chr7.699            | R   | KY.Chr7.699.v2.SL2-2    | 4.25E-30  | O60232  | SSSCA1 (Sjogren syndrome/scleroderma autoantigen 1)                              |
| KY.Chr7.700            | R   | KY.Chr7.700.v1.SL1-1    | 0         | Q96NH3  | TBC1D32 (TBC1 domain family member 32)                                           |
| KY.Chr7.701            | R   | KY.Chr7.701.v1.SL2-2    | 1.18E-58  | P31947  | SFN (stratifin)                                                                  |
| KY.Chr7.702            | R   | KY.Chr7.702.v1.SL1-1    | 4.49E-15  | Q2M3R5  | SLC35G1 (solute carrier family 35 member G1)                                     |
| KY.Chr7.703<br>(Hox13) | R   | KY.Chr7.703.v2.SL2-1    | 3.63E-21  | P35452  | HOXD12 (homeobox D12)                                                            |
| KY.Chr7.704<br>(Hox12) | R   | KY.Chr7.704.v1.ND1-1    | 3.26E-20  | P35452  | HOXD12 (homeobox D12)                                                            |
| KY.Chr7.705            | R   | KY.Chr7.705.v2.SL1-2    | 3.20E-66  | O15484  | CAPN5 (calpain 5)                                                                |
| KY.Chr7.706            | R   | KY.Chr7.706.v2.nonSL3-4 | 0         | Q13153  | PAK1 (p21 (RAC1) activated kinase 1)                                             |
| KY.Chr7.707            | R   | KY.Chr7.707.v2.ND2-1    | 0         | Q9UPN4  | CEP131 (centrosomal protein 131)                                                 |
| KY.Chr7.708            | R   | KY.Chr7.708.v1.ND1-1    | 1.47E-08  | P32245  | MC4R (melanocortin 4 receptor)                                                   |
| KY.Chr7.709            | R   | KY.Chr7.709.v2.nonSL9-3 | 0         | Q96KG9  | SCYL1 (SCY1 like pseudokinase 1)                                                 |
| KY.Chr7.710            | R   | KY.Chr7.710.v1.SL4-1    | 2.75E-132 | P02708  | CHRNA1 (cholinergic receptor nicotinic alpha 1 subunit)                          |
| KY.Chr7.711            | R   | KY.Chr7.711.v1.SL1-3    | 2.61E-22  | Q7Z410  | TMPPRS9 (transmembrane serine protease 9)                                        |
| KY.Chr7.712            | R   | KY.Chr7.712.v2.ND1-2    | 2.46E-21  | Q6HA08  | ASTL (astacin like metalloendopeptidase)                                         |
| KY.Chr7.713            | R   | KY.Chr7.713.v2.ND1-1    | 6.67E-15  | P07996  | THBS1 (thrombospondin 1)                                                         |
| KY.Chr7.714            | R   | KY.Chr7.714.v1.nonSL2-2 | 9.02E-16  | Q92847  | GHSR (growth hormone secretagogue receptor)                                      |
| KY.Chr7.715            | R   | KY.Chr7.715.v1.SL1-1    | 8.43E-20  | Q92847  | GHSR (growth hormone secretagogue receptor)                                      |
| KY.Chr7.716            | R   | KY.Chr7.716.v1.nonSL9-1 | 0         | Q8IY16  | EXOC8 (exocyst complex component 8)                                              |
| KY.Chr7.717            | R   | KY.Chr7.717.v1.ND1-1    | 0.68      | P12110  | COL6A2 (collagen type VI alpha 2 chain)                                          |
| KY.Chr7.718            | R   | KY.Chr7.718.v3.SL6-1    | 3.77E-31  | Q53S33  | BOLA3 (bola family member 3)                                                     |
| KY.Chr7.719            | R   | KY.Chr7.719.v1.SL1-1    | 0         | Q9NV17  | ATAD3A (ATPase family AAA domain containing 3A)                                  |
| KY.Chr7.720            | R   | KY.Chr7.720.v1.nonSL3-1 | 2.45E-97  | Q96G74  | OTUD5 (OTU deubiquitinase 5)                                                     |
| KY.Chr7.721            | R   | KY.Chr7.721.v1.SL5-5    | 9.07E-115 | Q96Q11  | TRNT1 (tRNA nucleotidyl transferase 1)                                           |
| KY.Chr7.722            | R   | KY.Chr7.722.v1.SL1-1    | 1.34E-37  | Q9H0R6  | QRSL1 (glutaminylnRNA amidotransferase subunit QRSL1)                            |
| KY.Chr8.779            | R/P | KY.Chr8.779.v2.SL1-2    | 3.85E-95  | Q96S53  | TESK2 (testis associated actin remodeling kinase 2)                              |
| KY.Chr8.780            | R/P | KY.Chr8.780.v2.nonSL2-2 | 0         | Q0JRZ9  | FCHO2 (FCH domain only 2)                                                        |
| KY.Chr8.781            | R/P | KY.Chr8.781.v1.ND1-1    | 0.46      | Q9H400  | RAD21L1 (RAD21 cohesin complex component like 1)                                 |
| KY.Chr8.782            | R/P | KY.Chr8.782.v2.SL1-1    | 6.7       | P56937  | HSD17B7 (hydroxysteroid 17-beta dehydrogenase 7)                                 |
| KY.Chr8.783            | R/P | KY.Chr8.783.v1.SL1-1    | 1.42E-136 | Q16543  | CDC37 (cell division cycle 37)                                                   |
| KY.Chr8.784            | R/P | KY.Chr8.784.v1.SL1-1    | 0.12      | O43488  | AKR7A2 (aldo-keto reductase family 7 member A2)                                  |
| KY.Chr8.785            | R/P | KY.Chr8.785.v3.SL2-3    | 2.3       | Q7Z569  | BRAP (BRCA1 associated protein)                                                  |
| KY.Chr8.786            | R/P | KY.Chr8.786.v1.ND1-1    | 3.3       | Q13618  | CUL3 (cullin 3)                                                                  |
| KY.Chr8.787            | R/P | KY.Chr8.787.v4.ND4-6    | 1.06E-93  | Q4G0N4  | NADK2 (NAD kinase 2 mitochondrial)                                               |
| KY.Chr8.788            | R/P | KY.Chr8.788.v1.ND1-1    | 4         | Q96KN3  | PKNOX2 (PBX/knotted 1 homeobox 2)                                                |
| KY.Chr8.789            | R/P | KY.Chr8.789.v1.ND1-1    | 1.8       | Q96F81  | DISP1 (dispatched RND transporter family member 1)                               |
| KY.Chr8.790            | R/P | KY.Chr8.790.v1.SL2-1    | 3.45E-69  | P16233  | PNLIP (pancreatic lipase)                                                        |
| KY.Chr8.791            | R/P | KY.Chr8.791.v1.ND1-1    | 3.35E-07  | Q8N0U7  | C1orf87 (chromosome 1 open reading frame 87)                                     |
| KY.Chr8.792            | R/P | KY.Chr8.792.v1.SL2-1    | 0         | Q94889  | KLHL18 (kelch like family member 18)                                             |
| KY.Chr8.793            | R/P | KY.Chr8.793.v1.nonSL5-1 | 1.14E-16  | P14927  | UQCRB (ubiquinol-cytochrome c reductase binding protein)                         |
| KY.Chr8.794            | R/P | KY.Chr8.794.v1.nonSL1-1 | 0         | Q92947  | GCDH (glutaryl-CoA dehydrogenase)                                                |
| KY.Chr8.795            | R/P | KY.Chr8.795.v1.SL2-1    | 4.70E-11  | Q9NNZ3  | DNAJC4 (Dnal heat shock protein family (Hsp40) member C4)                        |
| KY.Chr8.796            | R/P | KY.Chr8.796.v1.nonSL1-1 | 0.72      | Q9Y4H2  | IRS2 (insulin receptor substrate 2)                                              |
| KY.Chr8.797            | R/P | KY.Chr8.797.v6.nonSL9-1 | 0         | P48729  | CSNK1A1 (casein kinase 1 alpha 1)                                                |
| KY.Chr8.798            | R/P | KY.Chr8.798.v3.nonSL2-3 | 4.77E-80  | Q9NYB5  | SLCO1C1 (solute carrier organic anion transporter family member 1C1)             |
| KY.Chr8.801            | R/P | KY.Chr8.801.v2.nonSL9-5 | 2.72E-157 | Q96D17  | SNRNP40 (small nuclear ribonucleoprotein U5 subunit 40)                          |
| KY.Chr8.804            | R/P | KY.Chr8.804.v3.nonSL6-3 | 4.67E-16  | Q9BXS4  | TMEM59 (transmembrane protein 59)                                                |
| KY.Chr8.805            | R/P | KY.Chr8.805.v1.ND1-1    | 0.1       | Q7L9B9  | EPPD1 (endonuclease/exonuclease/phosphatase family domain containing 1)          |
| KY.Chr8.806            | R/P | KY.Chr8.806.v1.nonSL2-1 | 1.04E-41  | Q9BTX1  | NDC1 (NDC1 transmembrane nucleoporin)                                            |
| KY.Chr8.807            | R/P | KY.Chr8.807.v1.ND1-1    | 2.4       | P37231  | PPARG (peroxisome proliferator activated receptor gamma)                         |
| KY.Chr8.808            | R/P | KY.Chr8.808.v1.ND1-1    | 0.7       | Q3KQZ1  | SLC25A35 (solute carrier family 25 member 35)                                    |
| KY.Chr8.809            | R/P | KY.Chr8.809.v1.ND1-1    | 2.4       | Q5TH14  | VPS13D (vacuolar protein sorting 13 homolog D)                                   |
| KY.Chr8.810            | R/P | KY.Chr8.810.v1.ND1-1    | 2.25E-25  | Q6QNK2  | ADGRD1 (adhesion G protein-coupled receptor D1)                                  |
| KY.Chr8.811            | R/P | KY.Chr8.811.v1.ND1-1    | 0.35      | Q8NEG5  | ZSWIM2 (zinc finger SWIM-type containing 2)                                      |
| KY.Chr8.812            | R/P | KY.Chr8.812.v1.SL2-5    | 2.43E-155 | Q01973  | ROR1 (receptor tyrosine kinase like orphan receptor 1)                           |
| KY.Chr8.813            | R/P | KY.Chr8.813.v1.ND1-1    | 1.4       | Q5TAA0  | TTC22 (tetratricopeptide repeat domain 22)                                       |
| KY.Chr8.815            | R/P | KY.Chr8.815.v6.SL6-2    | 1.78E-22  | P17612  | PRKACA (protein kinase cAMP-activated catalytic subunit alpha)                   |
| KY.Chr8.816            | R/P | KY.Chr8.816.v4.ND4-3    | 1.37E-07  | Q92673  | SORL1 (sortilin related receptor 1)                                              |
| KY.Chr8.817            | R/P | KY.Chr8.817.v1.SL1-1    | 1.15E-48  | Q8N7M0  | TCTEX1D1 (Tctex1 domain containing 1)                                            |
| KY.Chr8.818            | R/P | KY.Chr8.818.v1.SL1-1    | 0.42      | Q8ND82  | BANK1 (B cell scaffold protein with ankyrin repeats 1)                           |
| KY.Chr8.819            | R/P | KY.Chr8.819.v2.SL2-2    | 2.14E-14  | O95402  | MED26 (mediator complex subunit 26)                                              |
| KY.Chr8.820            | R/P |                         |           |         | no significant match found                                                       |
| KY.Chr8.821            | R/P | KY.Chr8.821.v1.ND1-1    | 0.11      | Q9HDC5  | JPH1 (junctophilin 1)                                                            |
| KY.Chr8.822            | R/P | KY.Chr8.822.v1.ND1-1    | 1.3       | Q0VDD8  | DNAH14 (dynein axonemal heavy chain 14)                                          |
| KY.Chr8.823            | R/P | KY.Chr8.823.v1.ND1-1    | 1         | P48643  | CCT5 (chaperonin containing TCP1 subunit 5)                                      |
| KY.Chr8.824            | R/P |                         |           |         | no significant match found                                                       |
| KY.Chr8.825            | R/P | KY.Chr8.825.v1.ND1-1    | 0.19      | Q4KMP7  | TBC1D10B (TBC1 domain family member 10B)                                         |
| KY.Chr8.826            | R/P | KY.Chr8.826.v1.nonSL7-1 | 0.31      | Q8IZD9  | DOCK3 (dedicator of cytokinesis 3)                                               |
| KY.Chr8.827            | R/P | KY.Chr8.827.v3.SL1-3    | 0.004     | Q5VTH9  | WDR78 (WD repeat domain 78)                                                      |
| KY.Chr8.828            | R/P | KY.Chr8.828.v2.SL2-2    | 6.20E-80  | O60502  | OGA (O-GlcNAcase)                                                                |
| KY.Chr8.829            | R/P | KY.Chr8.829.v1.SL1-1    | 8.48E-27  | Q96N64  | PWWP2A (PWWP domain containing 2A)                                               |
| KY.Chr8.830            | R/P | KY.Chr8.830.v3.ND4-1    | 0         | P49902  | NT5C2 (5'-nucleotidase cytosolic II)                                             |
| KY.Chr8.831            | R/P | KY.Chr8.831.v1.ND1-1    | 0.42      | Q9HBJ7  | USP29 (ubiquitin specific peptidase 29)                                          |
| KY.Chr8.832            | R/P | KY.Chr8.832.v1.ND1-1    | 0.02      | O14776  | TCERG1 (transcription elongation regulator 1)                                    |
| KY.Chr8.833            | R/P | KY.Chr8.833.v2.ND4-8    | 9.42E-74  | Q96CD2  | PPCDC (phosphopantothenoylcysteine decarboxylase)                                |
| KY.Chr8.834            | R/P | KY.Chr8.834.v1.SL1-1    | 2.74E-119 | O95395  | GCNT3 (glucosaminyl (N-acetyl) transferase 3 mucin type)                         |
| KY.Chr8.835            | R/P | KY.Chr8.835.v1.SL1-1    | 0.15      | Q3T8J9  | GON4L (gon-4 like)                                                               |
| KY.Chr8.836            | R/P | KY.Chr8.836.v2.SL3-1    | 0.48      | P07911  | UMOD (uromodulin)                                                                |
| KY.Chr8.837            | R/P | KY.Chr8.837.v1.ND1-1    | 2.9       | Q01484  | ANK2 (ankyrin 2)                                                                 |
| KY.Chr8.838            | R/P | KY.Chr8.838.v2.SL1-2    | 2.25E-92  | Q9UIL4  | KIF25 (kinesin family member 25)                                                 |
| KY.Chr8.839            | R/P | KY.Chr8.839.v3.SL3-1    | 1.96E-57  | O60513  | B4GALT4 (beta-1,4-galactosyltransferase 4)                                       |
| KY.Chr8.840            | R/P | KY.Chr8.840.v2.SL3-1    | 2.17E-103 | Q96HU8  | DIRAS2 (DIRAS family GTPase 2)                                                   |
| KY.Chr8.841            | R/P | KY.Chr8.841.v1.ND1-1    | 0.2       | P53814  | SMTN (smoothelin)                                                                |
| KY.Chr8.842            | R/P | KY.Chr8.842.v1.SL1-1    | 5.63E-13  | O75443  | TECTA (tectorin alpha)                                                           |
| KY.Chr9.407            | P   | KY.Chr9.407.v2.SL7-2    | 1.11E-64  | Q9Y6D9  | MAD1L1 (mitotic arrest deficient 1 like 1)                                       |
| KY.Chr9.408            | P   | KY.Chr9.408.v1.nonSL9-1 | 5.33E-13  | Q8IYW8  | SPNS2 (sphingolipid transporter 2)                                               |
| KY.Chr9.409            | P   | KY.Chr9.409.v1.nonSL4-2 | 3.02E-64  | Q08379  | GOLGA2 (golgin A2)                                                               |
| KY.Chr9.843            | R/P | KY.Chr9.843.v3.nonSL8-8 | 1.00E-56  | Q14684  | RRP1B (ribosomal RNA processing 1B)                                              |
| KY.Chr9.844            | R/P | KY.Chr9.844.v1.ND1-1    | 1.85E-20  | Q86WB7  | UNC93A (unc-93 homolog A)                                                        |
| KY.Chr9.845            | R/P | KY.Chr9.845.v1.SL1-1    | 0.84      | Q6ZNG2  | DBX2 (developing brain homeobox 2)                                               |
| KY.Chr9.846            | R/P | KY.Chr9.846.v1.nonSL1-1 | 0.23      | Q96QU1  | PCDH15 (protocadherin related 15)                                                |
| KY.Chr9.847            | R/P | KY.Chr9.847.v1.SL1-1    | 2         | A4UGR9  | XIRP2 (xin actin binding repeat containing 2)                                    |
| KY.Chr9.848            | R/P | KY.Chr9.848.v1.ND1-1    | 0.1       | O00116  | AGPS (alkylglycerone phosphate synthase)                                         |
| KY.Chr9.849            | R/P | KY.Chr9.849.v1.SL2-1    | 0.3       | Q4KWH8  | PLCH1 (phospholipase C eta 1)                                                    |
| KY.Chr9.850            | R/P | KY.Chr9.850.v1.ND1-1    | 0.93      | O96005  | CLPTM1 (CLPTM1 regulator of GABA type A receptor forward trafficking)            |
| KY.Chr9.851            | R/P | KY.Chr9.851.v2.SL16-2   | 3.83E-17  | Q13501  | SQSTM1 (sequestosome 1)                                                          |
| KY.Chr9.852            | R/P | KY.Chr9.852.v1.nonSL9-2 | 3.00E-22  | Q13501  | SQSTM1 (sequestosome 1)                                                          |
| KY.Chr9.853            | R/P | KY.Chr9.853.v1.nonSL6-1 | 0.059     | Q9UBG0  | MRC2 (mannose receptor C type 2)                                                 |
| KY.Chr9.854            | R/P | KY.Chr9.854.v2.ND2-2    | 0.006     | Q9UBG0  | MRC2 (mannose receptor C type 2)                                                 |
| KY.Chr9.855            | R/P | KY.Chr9.855.v1.ND1-1    | 0.35      | Q9UBG0  | MRC2 (mannose receptor C type 2)                                                 |
| KY.Chr9.856            | R/P | KY.Chr9.856.v2.ND2-2    | 6.95E-147 | Q13233  | MAP3K1 (mitogen-activated protein kinase kinase kinase 1)                        |
| KY.Chr9.858            | R/P | KY.Chr9.858.v1.ND1-1    | 2.42E-19  | Q8XWDX0 | RFXP2 (relaxin family peptide receptor 2)                                        |

|               |     |                           |           |        |                                                                                             |
|---------------|-----|---------------------------|-----------|--------|---------------------------------------------------------------------------------------------|
| KY.Chr9.859   | R/P | KY.Chr9.859.v1.ND1-1      | 2.25E-12  | Q07954 | LRP1 (LDL receptor related protein 1)                                                       |
| KY.Chr9.860   | R/P | KY.Chr9.860.v1.nonSL9-1   | 3.48E-75  | Q5JTD7 | LRRC73 (leucine rich repeat containing 73)                                                  |
| KY.Chr9.861   | R/P | KY.Chr9.861.v1.SL1-1      | 1.73E-163 | P24821 | TNC (tenascin C)                                                                            |
| KY.Chr9.862   | R/P | KY.Chr9.862.v1.ND1-1      | 6.03E-04  | Q9NR30 | DDX21 (DEXD-box helicase 21)                                                                |
| KY.Chr9.863   | R/P | KY.Chr9.863.v1.ND1-1      | 0.009     | P02751 | FN1 (fibronectin 1)                                                                         |
| KY.Chr9.864   | R/P | KY.Chr9.864.v1.SL3-1      | 0         | Q9NR30 | DDX21 (DEXD-box helicase 21)                                                                |
| KY.Chr9.1061  | R/P | KY.Chr9.1061.v2.SL3-1     | 5.63E-36  | O00622 | CCN1 (cellular communication network factor 1)                                              |
| KY.Chr9.1062  | R/P | KY.Chr9.1062.v1.ND1-1     | 0.45      | Q9NS00 | C1GALT1 (core 1 synthase glycoprotein-N-acetylgalactosamine 3-beta-galactosyltransferase 1) |
| KY.Chr9.1063  | R/P | KY.Chr9.1063.v1.ND1-1     | 1.2       | Q81ZU2 | WDR17 (WD repeat domain 17)                                                                 |
| KY.Chr9.1064  | R/P | KY.Chr9.1064.v2.nonSL3-2  | 1.39E-28  | P29279 | CCN2 (cellular communication network factor 2)                                              |
| KY.Chr9.1065  | R/P | KY.Chr9.1065.v1.ND1-1     | 2.1       | Q14139 | UBE4A (ubiquitination factor E4A)                                                           |
| KY.Chr9.1066  | R/P | KY.Chr9.1066.v2.nonSL7-2  | 1.24E-36  | Q9NWK9 | ZNHIT6 (zinc finger HIT-type containing 6)                                                  |
| KY.Chr9.1067  | R/P | KY.Chr9.1067.v2.SL4-1     | 9.68E-35  | P48745 | CCN3 (cellular communication network factor 3)                                              |
| KY.Chr9.1068  | R/P | KY.Chr9.1068.v1.ND1-1     | 1         | Q81WK6 | ADGRA3 (adhesion G protein-coupled receptor A3)                                             |
| KY.Chr9.1069  | R/P | KY.Chr9.1069.v1.ND1-1     | 0.25      | Q9Y3A2 | UTP11 (UTP11 small subunit processome component)                                            |
| KY.Chr9.1070  | R/P | KY.Chr9.1070.v1.ND1-2     | 0.046     | Q8TEB1 | DCAF11 (DDB1 and CUL4 associated factor 11)                                                 |
| KY.Chr9.1071  | R/P | KY.Chr9.1071.v1.nonSL5-1  | 2.47E-43  | P28845 | HSD11B1 (hydroxysteroid 11-beta dehydrogenase 1)                                            |
| KY.Chr9.1072  | R/P | KY.Chr9.1072.v1.ND1-1     | 0.56      | Q9NZP5 | OR5AC2 (olfactory receptor family 5 subfamily AC member 2)                                  |
| KY.Chr9.1073  | R/P | KY.Chr9.1073.v1.nonSL7-1  | 7.03E-172 | Q81UR7 | ARMC8 (armadillo repeat containing 8)                                                       |
| KY.Chr9.1074  | R/P | KY.Chr9.1074.v1.nonSL3-1  | 0         | O60341 | KDM1A (lysine demethylase 1A)                                                               |
| KY.Chr9.1075  | R/P | KY.Chr9.1075.v1.ND1-1     | 1.3       | Q99884 | SLC6A7 (solute carrier family 6 member 7)                                                   |
| KY.Chr9.1076  | R/P | KY.Chr9.1076.v2.nonSL4-4  | 2.91E-36  | Q16819 | MEP1A (meprin A subunit alpha)                                                              |
| KY.Chr9.1077  | R/P | KY.Chr9.1077.v1.ND1-3     | 0.003     | Q9XB69 | CARD6 (caspase recruitment domain family member 6)                                          |
| KY.Chr9.1078  | R/P | KY.Chr9.1078.v3.nonSL7-1  | 0.003     | Q9NVA4 | TMEM184C (transmembrane protein 184C)                                                       |
| KY.Chr9.1079  | R/P | KY.Chr9.1079.v1.ND1-1     | 4.92E-12  | Q86UW1 | SLC51A (solute carrier family 51 alpha subunit)                                             |
| KY.Chr9.1080  | R/P | KY.Chr9.1080.v1.SL1-1     | 2.73E-92  | Q8NSZ0 | AADAT (aminoadipate aminotransferase)                                                       |
| KY.Chr9.1081  | R/P | KY.Chr9.1081.v1.ND1-1     | 1.92E-78  | Q8NSZ0 | AADAT (aminoadipate aminotransferase)                                                       |
| KY.Chr9.1082  | R/P | KY.Chr9.1082.v1.ND1-1     | 2.89E-40  | Q7L985 | LINGO2 (leucine rich repeat and Ig domain containing 2)                                     |
| KY.Chr9.1083  | R/P | KY.Chr9.1083.v1.SL1-1     | 2.81E-87  | Q76083 | PDE9A (phosphodiesterase 9A)                                                                |
| KY.Chr9.1084  | R/P | KY.Chr9.1084.v2.nonSL3-2  | 3.69E-27  | Q5TZF3 | ANKRD45 (ankyrin repeat domain 45)                                                          |
| KY.Chr9.1085  | R/P | KY.Chr9.1085.v1.ND1-1     | 8.95E-28  | Q6HA08 | ASTL (astacin like metalloendopeptidase)                                                    |
| KY.Chr9.1086  | R/P | KY.Chr9.1086.v1.nonSL6-1  | 5.4       | Q13360 | ZNF177 (zinc finger protein 177)                                                            |
| KY.Chr9.1087  | R/P | KY.Chr9.1087.v1.SL2-1     | 3.98E-08  | Q75445 | USH2A (usherin)                                                                             |
| KY.Chr9.1089  | R/P | KY.Chr9.1089.v5.ND3-4     | 1.51E-04  | Q75445 | USH2A (usherin)                                                                             |
| KY.Chr9.1090  | R/P | KY.Chr9.1090.v1.nonSL1-1  | 6.07E-04  | Q75445 | USH2A (usherin)                                                                             |
| KY.Chr9.1091  | R/P | KY.Chr9.1091.v1.ND1-1     | 0.006     | Q96NN9 | AIFM3 (apoptosis inducing factor mitochondria associated 3)                                 |
| KY.Chr9.1092  | R/P | KY.Chr9.1092.v1.ND1-1     | 0         | Q9Y2E4 | DIP2C (disco interacting protein 2 homolog C)                                               |
| KY.Chr9.1093  | R/P | KY.Chr9.1093.v1.nonSL2-1  | 3.66E-107 | Q9Y221 | NIP7 (nuclear pre-rRNA processing protein NIP7)                                             |
| KY.Chr9.1094  | R/P | KY.Chr9.1094.v1.SL2-1     | 3.48E-29  | A6NGC4 | TLCD2 (TLC domain containing 2)                                                             |
| KY.Chr9.1095  | R/P | KY.Chr9.1095.v2.nonSL3-1  | 4.65E-114 | N8E827 | NME8 (NME/NM23 family member 8)                                                             |
| KY.Chr9.1096  | R/P | KY.Chr9.1096.v2.SL2-1     | 4.69E-25  | Q15398 | DLGAP5 (DLG associated protein 5)                                                           |
| KY.Chr9.1097  | R/P | KY.Chr9.1097.v1.SL1-1     | 3.12E-66  | P37288 | AVPR1A (arginine vasopressin receptor 1A)                                                   |
| KY.Chr9.1098  | R/P | KY.Chr9.1098.v1.SL1-1     | 7.04E-10  | Q8N8K9 | KIAA1958 (KIAA1958)                                                                         |
| KY.Chr9.1099  | R/P | KY.Chr9.1099.v3.ND3-1     | 0.96      | P35580 | MYH10 (myosin heavy chain 10)                                                               |
| KY.Chr9.1100  | R/P | KY.Chr9.1100.v1.SL1-1     | 1.35E-37  | Q6ZWJ1 | STXBP4 (syntaxin binding protein 4)                                                         |
| KY.Chr9.1101  | R/P | KY.Chr9.1101.v1.nonSL7-1  | 0         | Q5T2E6 | ARMH3 (armadillo like helical domain containing 3)                                          |
| KY.Chr9.1102  | R/P | KY.Chr9.1102.v2.nonSL4-3  | 1.64E-92  | A43824 | GTPBP6 (GTP binding protein 6 (putative))                                                   |
| KY.Chr9.1103  | R/P | KY.Chr9.1103.v2.SL2-1     | 0.84      | Q8N6M8 | IQCF1 (IQ motif containing F1)                                                              |
| KY.Chr9.1104  | R/P | KY.Chr9.1104.v1.nonSL7-1  | 1.5       | Q8WZ42 | TTN (titin)                                                                                 |
| KY.Chr9.1105  | R/P | KY.Chr9.1105.v2.ND1-2     | 0.86      | Q96PZ7 | CSMD1 (CUB and Sushi multiple domains 1)                                                    |
| KY.Chr9.1106  | R/P | KY.Chr9.1106.v1.SL1-1     | 1.82E-50  | P35408 | PTGER4 (prostaglandin E receptor 4)                                                         |
| KY.Chr9.1107  | R/P | KY.Chr9.1107.v1.nonSL3-1  | 2.70E-36  | Q9BTV7 | CABLES2 (Cdk5 and Abl enzyme substrate 2)                                                   |
| KY.Chr9.1108  | R/P | KY.Chr9.1108.v1.SL2-1     | 6.58E-135 | O95208 | EPN2 (epsin 2)                                                                              |
| KY.Chr9.1109  | R/P | KY.Chr9.1109.v1.ND1-1     | 1.8       | Q8NCG7 | DAGLB (diacylglycerol lipase beta)                                                          |
| KY.Chr9.1110  | R/P | KY.Chr9.1110.v1.nonSL1-1  | 3.09E-176 | P53611 | RABGGTB (Rab geranylgeranyltransferase subunit beta)                                        |
| KY.Chr9.1111  | R/P | KY.Chr9.1111.v1.nonSL8-1  | 4.85E-71  | Q5VZ52 | MORN5 (MORN repeat containing 5)                                                            |
| KY.Chr9.1112  | R/P | KY.Chr9.1112.v1.nonSL1-1  | 5.48E-15  | P51970 | NDUFA8 (NADH:ubiquinone oxidoreductase subunit A8)                                          |
| KY.Chr9.1113  | R/P | KY.Chr9.1113.v1.nonSL1-1  | 4.75E-32  | P51970 | NDUFA8 (NADH:ubiquinone oxidoreductase subunit A8)                                          |
| KY.Chr9.1114  | R/P | KY.Chr9.1114.v1.ND1-1     | 0.006     | Q9Y493 | ZAN (zonadhesin (gene/pseudogene))                                                          |
| KY.Chr9.1115  | R/P | KY.Chr9.1115.v1.ND1-1     | 2.83E-147 | P05186 | ALPL (alkaline phosphatase biomineralization associated)                                    |
| KY.Chr9.1116  | R/P | KY.Chr9.1116.v1.nonSL1-1  | 5.70E-72  | Q96FB5 | RRNAD1 (ribosomal RNA adenine dimethylase domain containing 1)                              |
| KY.Chr9.1117  | R/P | KY.Chr9.1117.v1.ND1-2     | 1.27E-16  | Q96FB5 | RRNAD1 (ribosomal RNA adenine dimethylase domain containing 1)                              |
| KY.Chr9.1118  | R/P | KY.Chr9.1118.v2.ND1-2     | 1.5       | P51610 | HCFC1 (host cell factor C1)                                                                 |
| KY.Chr9.1119  | R/P | KY.Chr9.1119.v1.nonSL1-1  | 0.047     | Q81ZF4 | ADGRG5 (adhesion G protein-coupled receptor G5)                                             |
| KY.Chr9.1120  | R/P | KY.Chr9.1120.v1.SL1-1     | 4.43E-107 | O60318 | MCM3AP (minichromosome maintenance complex component 3 associated protein)                  |
| KY.Chr9.1121  | R/P | KY.Chr9.1121.v1.ND1-1     | 6.97E-98  | Q9UG56 | PISD (phosphatidylserine decarboxylase)                                                     |
| KY.Chr9.1122  | R/P | KY.Chr9.1122.v1.nonSL3-1  | 9.24E-10  | Q96Q35 | FLACC1 (flagellum associated containing coiled-coil domains 1)                              |
| KY.Chr9.1123  | R/P | KY.Chr9.1123.v1.SL1-1     | 0         | Q8WWZ7 | ABCA5 (ATP binding cassette subfamily A member 5)                                           |
| KY.Chr9.1124  | R/P | KY.Chr9.1124.v2.SL3-3     | 5.87E-137 | Q02040 | AKAP17A (A-kinase anchoring protein 17A)                                                    |
| KY.Chr9.1126  | R/P | KY.Chr9.1126.v1.SL1-1     | 3.93E-145 | Q96J16 | GMPPA (GDP-mannose pyrophosphorylase A)                                                     |
| KY.Chr9.1127  | R/P | KY.Chr9.1127.v5.ND6-1     | 0         | Q8WZ42 | TTN (titin)                                                                                 |
| KY.Chr10.148  | P   | KY.Chr10.148.v1.SL1-1     | 2.44E-06  | Q8N6G6 | ADAMTSL1 (ADAMTS like 1)                                                                    |
| KY.Chr10.149  | P   | KY.Chr10.149.v2.ND2-2     | 2.50E-14  | Q9NYQ7 | CELSR3 (cadherin EGF LAG seven-pass G-type receptor 3)                                      |
| KY.Chr10.150  | P   | KY.Chr10.150.v2.SL1-1     | 1.48E-101 | P23469 | PTPRE (protein tyrosine phosphatase receptor type E)                                        |
| KY.Chr10.1133 | R/P | KY.Chr10.1133.v1.SL2-1    | 0         | Q08211 | DHX9 (DEXH-box helicase 9)                                                                  |
| KY.Chr10.1134 | R/P | KY.Chr10.1134.v1.SL2-1    | 4.80E-121 | Q96RS6 | NUDCD1 (NudC domain containing 1)                                                           |
| KY.Chr10.1135 | R/P | KY.Chr10.1135.v2.SL2-2    | 0         | P54198 | HIRA (histone cell cycle regulator)                                                         |
| KY.Chr10.1136 | R/P | KY.Chr10.1136.v1.ND1-1    | 3.18E-78  | Q9HAE3 | EFCAB1 (EF-hand calcium binding domain 1)                                                   |
| KY.Chr10.1137 | R/P | KY.Chr10.1137.v1.nonSL5-1 | 0         | Q9P2E3 | ZNFX1 (zinc finger NFX1-type containing 1)                                                  |
| KY.Chr10.1138 | R/P | KY.Chr10.1138.v1.SL1-1    | 4.55E-87  | Q9H0C1 | ZMYND12 (zinc finger MYND-type containing 12)                                               |
| KY.Chr10.1139 | R/P | KY.Chr10.1139.v1.nonSL7-9 | 2.81E-53  | Q8TBF2 | PRXL2B (peroxiredoxin like 2B)                                                              |
| KY.Chr10.1140 | R/P | KY.Chr10.1140.v1.nonSL8-1 | 6.80E-79  | Q81YD2 | KLHDC8A (kelch domain containing 8A)                                                        |
| KY.Chr10.1141 | R/P | KY.Chr10.1141.v1.ND1-1    | 1.7       | Q7Z429 | GRINA (glutamate ionotropic receptor NMDA type subunit associated protein 1)                |
| KY.Chr10.1142 | R/P | KY.Chr10.1142.v1.ND1-1    | 6.69E-26  | Q86WB7 | UNC93A (unc-93 homolog A)                                                                   |
| KY.Chr10.1143 | R/P | KY.Chr10.1143.v2.nonSL2-2 | 1.68E-43  | Q9Y617 | PSAT1 (phosphoserine aminotransferase 1)                                                    |
| KY.Chr10.1144 | R/P | KY.Chr10.1144.v1.ND1-2    | 0.77      | Q8WZ92 | OR5P2 (olfactory receptor family 5 subfamily P member 2)                                    |
| KY.Chr10.1145 | R/P | KY.Chr10.1145.v1.nonSL3-1 | 1.11E-58  | Q9U114 | RABAC1 (Rab acceptor 1)                                                                     |
| KY.Chr10.1146 | R/P | KY.Chr10.1146.v1.nonSL9-1 | 1.29E-74  | Q8TF42 | UBASH3B (ubiquitin associated and SH3 domain containing B)                                  |
| KY.Chr10.1147 | R/P | KY.Chr10.1147.v1.nonSL2-1 | 0         | P38919 | EIF4A3 (eukaryotic translation initiation factor 4A3)                                       |
| KY.Chr10.1148 | R/P | KY.Chr10.1148.v2.SL6-1    | 0         | Q5TD94 | RSPH4A (radial spoke head component 4A)                                                     |
| KY.Chr10.1149 | R/P | KY.Chr10.1149.v1.nonSL9-1 | 4.97E-91  | Q9Y5A7 | NUB1 (negative regulator of ubiquitin like proteins 1)                                      |
| KY.Chr11.532  | R/P | KY.Chr11.532.v3.ND1-1     | 3.30E-103 | Q16659 | MAPK6 (mitogen-activated protein kinase 6)                                                  |
| KY.Chr11.533  | R/P | KY.Chr11.533.v1.ND1-1     | 4.5       | Q5TC58 | AK9 (adenylate kinase 9)                                                                    |
| KY.Chr11.534  | R/P | KY.Chr11.534.v1.ND1-1     | 0.004     | Q9BQ14 | CCDC3 (coiled-coil domain containing 3)                                                     |
| KY.Chr11.535  | R/P | KY.Chr11.535.v1.SL1-1     | 7.53E-06  | Q9NPC4 | A4GALT (alpha 1,4-galactosyltransferase (P blood group))                                    |
| KY.Chr11.536  | R/P | KY.Chr11.536.v1.ND1-1     | 1.9       | P20929 | NEB (nebulin)                                                                               |
| KY.Chr11.537  | R/P | KY.Chr11.537.v1.SL2-1     | 6.80E-12  | Q5JXM2 | METTL24 (methyltransferase like 24)                                                         |
| KY.Chr11.572  | R/P | KY.Chr11.572.v3.ND1-4     | 0         | O14983 | ATP2A1 (ATPase sarcoplasmic/endoplasmic reticulum Ca2+ transporting 1)                      |
| KY.Chr11.573  | R/P | KY.Chr11.573.v1.ND1-1     | 8.01E-17  | Q9C300 | GSTT2B (glutathione S-transferase theta 2B (gene/pseudogene))                               |
| KY.Chr11.574  | R/P | KY.Chr11.574.v1.ND1-1     | 7.31E-17  | P0CG30 | GSTT2B (glutathione S-transferase theta 2B (gene/pseudogene))                               |
| KY.Chr11.1268 | R/P | KY.Chr11.1268.v1.SL1-2    | 3.98E-77  | Q95406 | CNIH1 (cornichon family AMPA receptor auxiliary protein 1)                                  |
| KY.Chr11.1269 | R/P | KY.Chr11.1269.v1.SL1-1    | 8.39E-14  | Q6QNK2 | ADGRD1 (adhesion G protein-coupled receptor D1)                                             |
| KY.Chr11.1270 | R/P | KY.Chr11.1270.v1.SL1-1    | 1.74E-47  | P36639 | NUDT1 (nudix hydrolase 1)                                                                   |
| KY.Chr11.1271 | R/P | KY.Chr11.1271.v4.nonSL3-2 | 4.09E-07  | Q9Y2E6 | DTX4 (deltex E3 ubiquitin ligase 4)                                                         |
| KY.Chr11.1272 | R/P | KY.Chr11.1272.v2.SL2-2    | 0         | P56192 | MARS (methionyl-tRNA synthetase)                                                            |
| KY.Chr11.1273 | R/P | KY.Chr11.1273.v7.ND1-2    | 1.99E-153 | P05388 | RPLP0 (ribosomal protein lateral stalk subunit P0)                                          |
| KY.Chr11.1274 | R/P | KY.Chr11.1274.v2.ND1-3    | 0.76      | Q8NSZ0 | AADAT (aminoadipate aminotransferase)                                                       |
| KY.Chr11.1275 | R/P | KY.Chr11.1275.v3.ND6-1    | 1.20E-04  | Q15700 | DLG2 (discs large MAGUK scaffold protein 2)                                                 |
| KY.Chr11.1276 | R/P | KY.Chr11.1276.v1.SL1-1    | 2.99E-31  | P0C024 | NUDT7 (nudix hydrolase 7)                                                                   |
| KY.Chr11.1277 | R/P | KY.Chr11.1277.v1.nonSL9-1 | 3.89E-119 | P15259 | PGAM2 (phosphoglycerate mutase 2)                                                           |
| KY.Chr11.1278 | R/P | KY.Chr11.1278.v2.nonSL2-1 | 0.92      | P51449 | RORC (RAR related orphan receptor C)                                                        |
| KY.Chr11.1279 | R/P | KY.Chr11.1279.v1.nonSL9-1 | 1.49E-32  | P20674 | COX5A (cytochrome c oxidase subunit 5A)                                                     |
| KY.Chr11.1280 | R/P | KY.Chr11.1280.v1.SL1-1    | 0.71      | Q86X12 | NCAPG2 (non-SMC condensin II complex subunit G2)                                            |
| KY.Chr11.1281 | R/P | KY.Chr11.1281.v1.SL1-1    | 1.45E-41  | Q9Y2Y6 | TMEM98 (transmembrane protein 98)                                                           |
| KY.Chr11.1282 | R/P | KY.Chr11.1282.v1.nonSL2-1 | 8.94E-12  | Q8WWQ8 | STAB2 (stabilin 2)                                                                          |
| KY.Chr11.1283 | R/P | KY.Chr11.1283.v1.SL4-1    | 3.86E-40  | P17026 | ZNF22 (zinc finger protein 22)                                                              |
| KY.Chr11.1284 | R/P | KY.Chr11.1284.v1.ND1-1    | 3.46E-68  | Q96PF2 | TSSK2 (testis specific serine kinase 2)                                                     |

|               |     |                          |           |        |                                                                                   |
|---------------|-----|--------------------------|-----------|--------|-----------------------------------------------------------------------------------|
| KY.Chr11.1285 | R/P | KY.Chr11.1285.v1.ND1-1   | 3.2       | Q9P0L9 | PKD2L1 (polycystin 2 like 1, transient receptor potential cation channel)         |
| KY.Chr11.1291 | R/P | KY.Chr11.1291.v2.SL4-2   | 0         | P78504 | JAG1 (jagged canonical Notch ligand 1)                                            |
| KY.Chr11.1295 | R/P | KY.Chr11.1295.v1.ND1-1   | 0.39      | Q9NQ90 | ANO2 (anoctamin 2)                                                                |
| KY.Chr12.338  | R/P | KY.Chr12.338.v1.ND1-1    | 1.6       | Q9NXL6 | SIDT1 (SID1 transmembrane family member 1)                                        |
| KY.Chr12.339  | R/P | KY.Chr12.339.v4.ND3-3    | 1.79E-124 | A6NHR9 | SMCHD1 (structural maintenance of chromosomes flexible hinge domain containing 1) |
| KY.Chr12.340  | R/P | KY.Chr12.340.v1.nonSL1-1 | 0.56      | Q7Z698 | SPRED2 (sprouty related EVH1 domain containing 2)                                 |
| KY.Chr12.341  | R/P | KY.Chr12.341.v1.nonSL5-1 | 3.04E-83  | Q9NRA2 | SLC17A5 (solute carrier family 17 member 5)                                       |
| KY.Chr12.342  | R/P | KY.Chr12.342.v1.nonSL9-1 | 3.28E-11  | P50895 | BCAM (basal cell adhesion molecule (Lutheran blood group))                        |
| KY.Chr12.439  | R   | KY.Chr12.439.v1.ND1-1    | 2.28E-05  | Q9BYE9 | CDHR2 (cadherin related family member 2)                                          |
| KY.Chr12.440  | R   | KY.Chr12.440.v1.ND1-1    | 1.06E-14  | Q9C040 | TRIM2 (tripartite motif containing 2)                                             |
| KY.Chr12.441  | R   | KY.Chr12.441.v2.ND1-2    | 2.29E-09  | Q9C040 | TRIM2 (tripartite motif containing 2)                                             |
| KY.Chr12.442  | R   | KY.Chr12.442.v1.ND1-2    | 7.25E-71  | Q9BYE9 | CDHR2 (cadherin related family member 2)                                          |
| KY.Chr12.443  | R   | KY.Chr12.443.v2.SL2-1    | 1.56E-68  | Q02548 | PAX5 (paired box 5)                                                               |
| KY.Chr12.444  | R   | KY.Chr12.444.v1.SL1-1    | 8.2       | Q8N110 | DOCK4 (dedicator of cytokinesis 4)                                                |
| KY.Chr12.445  | R   | KY.Chr12.445.v1.ND1-2    | 0.26      | Q9BX66 | SORBS1 (sorbin and SH3 domain containing 1)                                       |
| KY.Chr12.446  | R   | KY.Chr12.446.v2.ND4-1    | 3.47E-178 | P06493 | CDK1 (cyclin dependent kinase 1)                                                  |
| KY.Chr12.447  | R   | KY.Chr12.447.v1.SL2-1    | 3.3       | Q6P5W5 | SLC39A4 (solute carrier family 39 member 4)                                       |
| KY.Chr12.448  | R   | KY.Chr12.448.v1.SL2-1    | 9.10E-99  | P62079 | TSPAN5 (tetraspanin 5)                                                            |
| KY.Chr12.449  | R   | KY.Chr12.449.v2.nonSL9-1 | 1.42E-95  | Q8IU8  | RIOX2 (ribosomal oxygenase 2)                                                     |
| KY.Chr12.450  | R   | KY.Chr12.450.v2.nonSL9-7 | 2.76E-159 | P08559 | PDHA1 (pyruvate dehydrogenase E1 alpha 1 subunit)                                 |
| KY.Chr12.451  | R   | KY.Chr12.451.v2.nonSL5-4 | 0         | P17812 | CTPS1 (CTP synthase 1)                                                            |
| KY.Chr12.452  | R   | KY.Chr12.452.v1.ND1-1    | 2.57E-14  | P46109 | CRKL (CRK like proto-oncogene adaptor protein)                                    |
| KY.Chr12.453  | R   | KY.Chr12.453.v1.SL2-1    | 2.76E-37  | P46109 | CRKL (CRK like proto-oncogene adaptor protein)                                    |
| KY.Chr12.454  | R   | KY.Chr12.454.v1.SL1-1    | 9.70E-103 | P46109 | CRKL (CRK like proto-oncogene adaptor protein)                                    |
| KY.Chr12.455  | R   | KY.Chr12.455.v1.nonSL7-1 | 7.39E-143 | Q6NUT3 | MFSD12 (major facilitator superfamily domain containing 12)                       |
| KY.Chr12.456  | R   |                          |           |        | no significant match found                                                        |
| KY.Chr12.457  | R   | KY.Chr12.457.v1.ND1-1    | 2.8       | Q03721 | KCNK4 (potassium voltage-gated channel subfamily C member 4)                      |
| KY.Chr12.458  | R   | KY.Chr12.458.v1.nonSL5-1 | 2.13E-160 | P43353 | ALDH3B1 (aldehyde dehydrogenase 3 family member B1)                               |
| KY.Chr12.459  | R   | KY.Chr12.459.v1.SL1-1    | 7.92E-85  | Q9BXD5 | NPL (N-acetylneuraminic pyruvate lyase)                                           |
| KY.Chr12.460  | R   | KY.Chr12.460.v1.ND1-1    | 0.002     | O75882 | ATRN (atractin)                                                                   |
| KY.Chr12.461  | R   | KY.Chr12.461.v1.ND1-1    | 1         | P78329 | CYP4F2 (cytochrome P450 family 4 subfamily F member 2)                            |
| KY.Chr12.465  | R   | KY.Chr12.465.v2.SL6-6    | 0         | Q00610 | CLTC (clathrin heavy chain)                                                       |
| KY.Chr12.466  | R   | KY.Chr12.466.v1.SL1-1    | 0         | Q96QK1 | VPS35 (VPS35 retromer complex component)                                          |
| KY.Chr12.898  | P   | KY.Chr12.898.v1.ND1-1    | 1.8       | P22897 | MRC1 (mannose receptor C-type 1)                                                  |
| KY.Chr12.899  | P   | KY.Chr12.899.v1.nonSL9-1 | 0         | O75439 | PMPCB (peptidase mitochondrial processing beta subunit)                           |
| KY.Chr12.900  | P   | KY.Chr12.900.v2.ND2-1    | 2.05E-06  | Q96PP4 | TSGA13 (tissue specific 13)                                                       |
| KY.Chr12.901  | P   | KY.Chr12.901.v1.SL1-1    | 4.42E-17  | P16112 | ACAN (aggregran)                                                                  |
| KY.Chr12.905  | R   | KY.Chr12.905.v1.nonSL4-1 | 1.10E-123 | Q9H7B2 | RPF2 (ribosome production factor 2 homolog)                                       |
| KY.Chr12.906  | R   | KY.Chr12.906.v1.nonSL4-1 | 1.53E-72  | Q3SXY8 | ARL13B (ADP ribosylation factor like GTPase 13B)                                  |
| KY.Chr12.907  | R   | KY.Chr12.907.v1.nonSL9-1 | 1.17E-25  | P0C875 | FAM228B (family with sequence similarity 228 member B)                            |
| KY.Chr12.908  | R   | KY.Chr12.908.v1.nonSL9-1 | 1.41E-28  | Q8NHR9 | PFN4 (profilin family member 4)                                                   |
| KY.Chr12.909  | R   | KY.Chr12.909.v1.SL1-1    | 5.39E-18  | Q8N2Z9 | CENPS (centromere protein S)                                                      |
| KY.Chr12.910  | R   | KY.Chr12.910.v1.nonSL8-1 | 2.1       | Q15849 | SLC14A2 (solute carrier family 14 member 2)                                       |
| KY.Chr12.911  | R   | KY.Chr12.911.v2.nonSL2-1 | 2.26E-60  | Q9UFN0 | NIPSNAP3A (nipsnap homolog 3A)                                                    |
| KY.Chr12.912  | R   | KY.Chr12.912.v1.SL1-1    | 2.01E-115 | Q12767 | TMEM94 (transmembrane protein 94)                                                 |
| KY.Chr12.913  | R   | KY.Chr12.913.v1.SL1-1    | 4.25E-74  | Q9NZJ6 | COQ3 (coenzyme Q3 methyltransferase)                                              |
| KY.Chr12.914  | R   | KY.Chr12.914.v1.nonSL1-1 | 4.46E-76  | Q86YH6 | PDSS2 (decaprenyl diphosphate synthase subunit 2)                                 |
| KY.Chr12.915  | R   | KY.Chr12.915.v1.SL2-2    | 6.10E-42  | Q9HBL7 | PLGRKT (plasminogen receptor with a C-terminal lysine)                            |
| KY.Chr12.916  | R   | KY.Chr12.916.v1.SL1-1    | 3.00E-17  | Q9BS16 | CENPK (centromere protein K)                                                      |
| KY.Chr12.917  | R   | KY.Chr12.917.v1.ND1-3    | 4.82E-134 | Q02094 | RHAG (Rh associated glycoprotein)                                                 |
| KY.Chr12.918  | R   | KY.Chr12.918.v2.ND1-1    | 2.33E-08  | Q9P2H0 | CEP126 (centrosomal protein 126)                                                  |
| KY.Chr12.919  | R   | KY.Chr12.919.v2.SL2-2    | 1.70E-25  | Q5TID7 | CCDC181 (coiled-coil domain containing 181)                                       |
| KY.Chr12.920  | R   | KY.Chr12.920.v2.SL3-2    | 6.16E-31  | Q96EK9 | KTI12 (KTI12 chromatin associated homolog)                                        |
| KY.Chr12.921  | R   | KY.Chr12.921.v1.nonSL2-1 | 0.26      | Q9BQG0 | MYBBP1A (MYB binding protein 1a)                                                  |
| KY.Chr12.922  | R   | KY.Chr12.922.v1.SL1-1    | 0         | P40692 | MLH1 (mutL homolog 1)                                                             |
| KY.Chr12.923  | R   | KY.Chr12.923.v1.nonSL6-1 | 4.25E-101 | Q96BW1 | UPRT (uracil phosphoribosyltransferase homolog)                                   |
| KY.Chr12.924  | R   | KY.Chr12.924.v2.nonSL6-2 | 8.21E-66  | Q7Z7C8 | TAF8 (TATA-box binding protein associated factor 8)                               |
| KY.Chr12.925  | R   | KY.Chr12.925.v1.nonSL2-1 | 0.088     | O15047 | SETD1A (SET domain containing 1A histone lysine methyltransferase)                |
| KY.Chr12.926  | R   | KY.Chr12.926.v1.SL3-1    | 3.59E-16  | Q6P197 | C11orf88 (chromosome 11 open reading frame 88)                                    |
| KY.Chr12.927  | R   | KY.Chr12.927.v1.SL1-1    | 4.41E-142 | Q8IZN3 | ZDHHC14 (zinc finger DHHC-type containing 14)                                     |
| KY.Chr12.928  | R   | KY.Chr12.928.v1.ND1-1    | 0.4       | Q9NUQ2 | AGPAT5 (1-acylglycerol-3-phosphate O-acyltransferase 5)                           |
| KY.Chr12.929  | R   | KY.Chr12.929.v2.SL2-2    | 2.03E-100 | Q96PU8 | QKI (QKI KH domain containing RNA binding)                                        |
| KY.Chr12.930  | R   | KY.Chr12.930.v1.SL1-1    | 4.2       | Q92796 | DLG3 (discs large MAGUK scaffold protein 3)                                       |
| KY.Chr12.931  | R   | KY.Chr12.931.v1.SL2-1    | 2.72E-73  | P98170 | XIAP (X-linked inhibitor of apoptosis)                                            |
| KY.Chr12.932  | R   | KY.Chr12.932.v1.ND1-1    | 1.48E-122 | Q14832 | GRM3 (glutamate metabotropic receptor 3)                                          |
| KY.Chr12.933  | R   | KY.Chr12.933.v1.ND1-1    | 8.57E-13  | Q9Y6W5 | WASF2 (WASP family member 2)                                                      |
| KY.Chr12.934  | R   | KY.Chr12.934.v1.nonSL2-1 | 0.26      | Q9H0B3 | IQCN (IQ motif containing N)                                                      |
| KY.Chr12.935  | R   | KY.Chr12.935.v1.ND1-1    | 1.7       | Q86YW0 | PLCZ1 (phospholipase C zeta 1)                                                    |
| KY.Chr12.936  | R   | KY.Chr12.936.v1.ND1-1    | 7.18E-04  | Q5S5E7 | NHSL1 (NHS like 1)                                                                |
| KY.Chr12.937  | R   | KY.Chr12.937.v2.nonSL7-1 | 1.44E-25  | P58658 | EVA1C (eva-1 homolog C)                                                           |
| KY.Chr12.938  | R   | KY.Chr12.938.v1.SL1-1    | 2.06E-05  | Q13591 | SEMA5A (semaphorin 5A)                                                            |
| KY.Chr13.346  | R/P | KY.Chr13.346.v3.ND6-4    | 0.57      | A6H8M9 | CDHR4 (cadherin related family member 4)                                          |
| KY.Chr13.347  | R/P | KY.Chr13.347.v1.SL2-1    | 2.54E-16  | P43166 | CA7 (carbonic anhydrase 7)                                                        |
| KY.Chr13.348  | R/P | KY.Chr13.348.v1.ND1-1    | 6.07E-62  | Q460N5 | PARP14 (poly(ADP-ribose) polymerase family member 14)                             |
| KY.Chr13.349  | R/P | KY.Chr13.349.v1.ND1-1    | 2.71E-40  | Q460N5 | PARP14 (poly(ADP-ribose) polymerase family member 14)                             |
| KY.Chr13.350  | R/P | KY.Chr13.350.v1.ND1-1    | 7.18E-37  | Q86SG7 | LYG2 (lysozyme g2)                                                                |
| KY.Chr13.351  | R/P | KY.Chr13.351.v1.nonSL1-1 | 5.57E-17  | Q8N1E2 | LYG1 (lysozyme g1)                                                                |
| KY.Chr13.352  | R/P | KY.Chr13.352.v1.SL2-1    | 6.03E-04  | P07996 | THBS1 (thrombospondin 1)                                                          |
| KY.Chr13.353  | R/P | KY.Chr13.353.v1.SL1-1    | 3.4       | Q6UY14 | ADAMTSL4 (ADAMTS like 4)                                                          |
| KY.Chr13.354  | R/P | KY.Chr13.354.v1.ND1-1    | 6.5       | Q96AY4 | TTC28 (tetratricopeptide repeat domain 28)                                        |
| KY.Chr13.355  | R/P | KY.Chr13.355.v1.ND1-1    | 6.11E-04  | P07996 | THBS1 (thrombospondin 1)                                                          |
| KY.Chr13.356  | R/P | KY.Chr13.356.v1.ND1-1    | 0.001     | A2VEC9 | SSPO (SCO-spondin)                                                                |
| KY.Chr13.357  | R/P | KY.Chr13.357.v2.SL5-5    | 0         | P49189 | ALDH9A1 (aldehyde dehydrogenase 9 family member A1)                               |
| KY.Chr13.358  | R/P | KY.Chr13.358.v2.SL6-4    | 0         | Q92759 | GTF2H4 (general transcription factor IIH subunit 4)                               |
| KY.Chr13.359  | R/P | KY.Chr13.359.v1.SL1-1    | 5.80E-125 | Q9Y483 | MTF2 (metal response element binding transcription factor 2)                      |
| KY.Chr13.360  | R/P | KY.Chr13.360.v1.SL1-1    | 1.43E-20  | Q9GZU5 | NYX (nyctalopin)                                                                  |
| KY.Chr13.361  | R/P | KY.Chr13.361.v1.ND1-1    | 1.44E-42  | Q94811 | TPPP (tubulin polymerization promoting protein)                                   |
| KY.Chr13.362  | R/P | KY.Chr13.362.v1.nonSL4-1 | 5.06E-161 | Q92643 | PIGK (phosphatidylinositol glycan anchor biosynthesis class K)                    |
| KY.Chr13.363  | R/P | KY.Chr13.363.v1.ND1-1    | 1.81E-09  | P07550 | ADRB2 (adrenoreceptor beta 2)                                                     |
| KY.Chr13.364  | R/P | KY.Chr13.364.v3.SL1-1    | 1.79E-128 | Q6P1R4 | DUS1L (dihydrouridine synthase 1 like)                                            |
| KY.Chr13.365  | R/P | KY.Chr13.365.v1.ND1-1    | 0.85      | P48065 | SLC6A12 (solute carrier family 6 member 12)                                       |
| KY.Chr13.366  | R/P | KY.Chr13.366.v1.nonSL6-1 | 2.7       | Q7Z5P9 | MUC19 (mucin 19, oligomeric)                                                      |
| KY.Chr13.367  | R/P | KY.Chr13.367.v1.ND1-1    | 6.45E-09  | Q7Z5P9 | MUC19 (mucin 19, oligomeric)                                                      |
| KY.Chr13.368  | R/P | KY.Chr13.368.v1.SL1-1    | 0         | P16066 | NPR1 (natriuretic peptide receptor 1)                                             |
| KY.Chr13.369  | R/P | KY.Chr13.369.v2.SL2-1    | 4.23E-86  | P37198 | NUP62 (nucleoporin 62)                                                            |
| KY.Chr13.370  | R/P | KY.Chr13.370.v2.SL2-1    | 2.16E-171 | P46059 | SLC15A1 (solute carrier family 15 member 1)                                       |
| KY.Chr13.371  | R/P | KY.Chr13.371.v1.SL1-1    | 5.09E-172 | P46059 | SLC15A1 (solute carrier family 15 member 1)                                       |
| KY.Chr14.437  | R   | KY.Chr14.437.v1.SL2-1    | 0         | P00558 | PGK1 (phosphoglycerate kinase 1)                                                  |
| KY.Chr14.438  | R   | KY.Chr14.438.v1.SL1-1    | 3.23E-68  | Q86S22 | TRAPP6B (trafficking protein particle complex 6B)                                 |
| KY.Chr14.439  | R   | KY.Chr14.439.v1.ND1-1    | 8.31E-14  | Q05707 | COL14A1 (collagen type XIV alpha 1 chain)                                         |
| KY.Chr14.440  | R   | KY.Chr14.440.v1.nonSL1-1 | 0         | Q14191 | WRN (Werner syndrome RecQ like helicase)                                          |
| KY.Chr14.441  | R   | KY.Chr14.441.v1.SL1-1    | 2.29E-62  | A0AVK6 | E2F8 (E2F transcription factor 8)                                                 |
| KY.Chr14.442  | R   | KY.Chr14.442.v1.SL1-1    | 0         | P53618 | COPB1 (coatomer protein complex subunit beta 1)                                   |

\*1 The HT inbred line (type A) has an inversion in chromosome 4, and therefore there are no inversions between chromosome 4 of wild type-A animals and those of specimen R or P.



**Supplementary Table S5. Chromosomal inversions identified from genomic alignments**

| Chromo<br>-somes | approx. genomic<br>positions <sup>*1</sup> |       |       | approx.<br>size of<br>inversion<br>s | Genes contained in inverted regions<br><sup>*2</sup>                                                                             |
|------------------|--------------------------------------------|-------|-------|--------------------------------------|----------------------------------------------------------------------------------------------------------------------------------|
|                  | HT<br>(type-A)                             | R     | P     |                                      |                                                                                                                                  |
| 1                | 4.66M                                      | -     | 4.70M | 99k                                  | KY.Chr1.974 (hemicentin 1)<br>KY.Chr1.975 (tubulin gamma complex associated protein 6)<br>KY.Chr1.976 (transmembrane protein 68) |
| 4                | 1.82M                                      | -     | 2.27M | 7k                                   | KY.Chr4.352 (pannexin 2)                                                                                                         |
| 5                | 286k                                       | 390k  | 285k  | 5k                                   | KY.Chr5.37 (Tetex1 domain containing 1)<br>KY.Chr5.38 (RAN binding protein 3)                                                    |
| 5                | 952k                                       | 1.11M | -     | 6k                                   | KY.Chr5.123 (collagen type XIV alpha 1 chain)                                                                                    |
| 9                | 1.88M                                      | 1.95M | 1.90M | 28k                                  | KY.Chr9.269 (phosphofructokinase, muscle)<br>KY.Chr9.269 (tectonic family member 3)<br>KY.Chr9.270 (karyopherin subunit beta 1)  |
| 9                | 4.00M                                      | 4.33M | -     | 4k                                   | KY.Chr9.544 (C-type lectin domain family 1 member B)                                                                             |
| 12               | 835k                                       | 1.02M | -     | 38k                                  | KY.Chr12.130 (methyltransferase like 14)                                                                                         |
| 13               | 1.15M                                      | 2.92M | -     | 3k                                   | KY.Chr13.149 (tolloid like 2)                                                                                                    |

<sup>\*1</sup> Hyphens indicate that no inversion was observed in specimen R or P against the type-A genome.

<sup>\*2</sup> The best hit proteins in human proteome are shown in parentheses.

**Supplementary Table S6. KY model identifiers for regulatory genes**

| <b>Gene name</b>  | <b>KY model identifier</b> |
|-------------------|----------------------------|
| <i>Admp</i>       | KY.Chr2.773                |
| <i>AHR</i>        | KY.Chr12.869               |
| <i>ALR-like</i>   | KY.Chr6.695                |
| <i>AP4</i>        | KY.Chr14.930               |
| <i>ARNT</i>       | KY.Chr5.617                |
| <i>Arx</i>        | KY.Chr1.1318               |
| <i>Ascl.a</i>     | KY.Chr2.2314               |
| <i>Ascl.b</i>     | KY.Chr2.2022               |
| <i>Ascl.c</i>     | KY.Chr2.1484               |
| <i>Atf2/7</i>     | KY.Chr7.484                |
| <i>Atf3</i>       | KY.Chr10.1341              |
| <i>Atf4/5</i>     | KY.Chr3.264                |
| <i>Atf6</i>       | KY.Chr13.318               |
| <i>Atonal</i>     | KY.Chr8.248                |
| <i>Bach</i>       | KY.Chr6.369                |
| <i>Baf57</i>      | KY.Chr10.1118              |
| <i>Barhl</i>      | KY.Chr11.403               |
| <i>Barx.a</i>     | KY.Chr7.1127               |
| <i>Barx.b</i>     | KY.Chr5.30                 |
| <i>Barx.c</i>     | KY.Chr4.1242               |
| <i>Bhlha15</i>    | KY.Chr3.1309               |
| <i>bHLH-like1</i> | KY.Chr9.350                |
| <i>Bhlhtun1</i>   | KY.Chr7.1158               |
| <i>Bhlhtun2</i>   | KY.Chr4.1008               |
| <i>Bhlhtun3</i>   | KY.Chr10.1238              |
| <i>Bhlhtun4</i>   | KY.Chr4.1211               |
| <i>Bmp2/4</i>     | KY.Chr4.449                |
| <i>Bmp3</i>       | KY.Chr12.885               |
| <i>Bmp5/6/7/8</i> | KY.Chr2.1328               |
| <i>Bsx</i>        | KY.Chr8.559                |
| <i>Bziptun1</i>   | KY.Chr13.44                |
| <i>Bziptun2</i>   | KY.Chr1.2593               |
| <i>Bziptun3</i>   | KY.Chr1.2594               |
| <i>Bziptun4</i>   | KY.Chr7.780                |
| <i>Bziptun5</i>   | KY.Chr2.2247               |
| <i>capicua</i>    | KY.Chr4.472                |

|                         |               |
|-------------------------|---------------|
| <i>Cdx</i>              | KY.Chr14.625  |
| <i>Cebpa</i>            | KY.Chr3.744   |
| <i>Cebpb/c/d/e</i>      | KY.Chr3.743   |
| <i>Chd</i>              | KY.Chr6.371   |
| <i>Creb1/Creml/Atf1</i> | KY.Chr1.2051  |
| <i>Creb3/11/14</i>      | KY.Chr10.829  |
| <i>Creb3l1</i>          | KY.Chr2.2188  |
| <i>Dand</i>             | KY.Chr10.1375 |
| <i>Dbx</i>              | KY.Chr3.681   |
| <i>Dlk</i>              | KY.Chr11.146  |
| <i>Dll</i>              | KY.Chr14.1158 |
| <i>Dlx.a</i>            | KY.Chr7.358   |
| <i>Dlx.b</i>            | KY.Chr7.359   |
| <i>Dlx.c</i>            | KY.Chr7.738   |
| <i>Dmbx</i>             | KY.Chr1.2439  |
| <i>Dmrt.a</i>           | KY.Chr5.698   |
| <i>Dmrt.b</i>           | KY.Chr8.251   |
| <i>Ebf</i>              | KY.Chr1.724   |
| <i>Efna.a</i>           | KY.Chr3.887   |
| <i>Efna.b</i>           | KY.Chr3.888   |
| <i>Efna.c</i>           | KY.Chr3.891   |
| <i>Efna.d</i>           | KY.Chr3.893   |
| <i>Efna.e</i>           | KY.Chr3.889   |
| <i>Efna.f</i>           | KY.Chr3.890   |
| <i>Efnb</i>             | KY.Chr1.563   |
| <i>Elf</i>              | KY.Chr14.539  |
| <i>Elf3/Ehf</i>         | KY.Chr4.609   |
| <i>Elk</i>              | KY.Chr8.613   |
| <i>Emx</i>              | KY.Chr8.1337  |
| <i>En</i>               | KY.Chr7.532   |
| <i>Erf.a</i>            | KY.Chr4.415   |
| <i>Erf.b</i>            | KY.Chr4.757   |
| <i>Esrr</i>             | KY.Chr11.439  |
| <i>Ets1/2.a</i>         | KY.Chr11.1070 |
| <i>Ets1/2.b</i>         | KY.Chr10.606  |
| <i>Etv</i>              | KY.Chr1.1124  |
| <i>Evx.a</i>            | KY.Chr1.2037  |
| <i>Fgf11/12/13/14</i>   | KY.Chr1.1     |
| <i>Fgf3/7/10/22</i>     | KY.Chr11.1355 |

|                   |                 |
|-------------------|-----------------|
| <i>Fgf4/5/6</i>   | KY.UAContig4.60 |
| <i>Fgf8/17/18</i> | KY.Chr5.496     |
| <i>Fgf9/16/20</i> | KY.Chr2.1217    |
| <i>Fgftun1</i>    | KY.Chr14.235    |
| <i>Fgftun2</i>    | KY.Chr1.1891    |
| <i>Figla-r</i>    | KY.Chr2.2108    |
| <i>Fli1/Erg.a</i> | KY.Chr4.259     |
| <i>Fli1/Erg.b</i> | KY.Chr10.1095   |
| <i>Fli1/Erg.c</i> | KY.Chr10.1096   |
| <i>Fli1/Erg.d</i> | KY.Chr4.801     |
| <i>Fos</i>        | KY.Chr11.1133   |
| <i>Foxa.a</i>     | KY.Chr11.1167   |
| <i>Foxa.b</i>     | KY.Chr11.406    |
| <i>Foxb</i>       | KY.Chr4.915     |
| <i>Foxc</i>       | KY.Chr12.156    |
| <i>Foxd.a</i>     | KY.Chr8.661     |
| <i>Foxd.b</i>     | KY.Chr8.660     |
| <i>Foxe</i>       | KY.Chr5.63      |
| <i>Foxf</i>       | KY.Chr3.1005    |
| <i>Foxg</i>       | KY.Chr8.702     |
| <i>Foxh.a</i>     | KY.Chr9.672     |
| <i>Foxh.b</i>     | KY.Chr14.65     |
| <i>Foxi.a</i>     | KY.Chr8.901     |
| <i>Foxi.b</i>     | KY.Chr8.900     |
| <i>Foxi.c</i>     | KY.Chr8.896     |
| <i>Foxj2</i>      | KY.Chr1.1301    |
| <i>Foxk</i>       | KY.Chr12.74     |
| <i>Foxl2</i>      | KY.Chr1.2069    |
| <i>Foxm</i>       | KY.Chr4.979     |
| <i>Foxn1/4.b</i>  | KY.Chr6.670     |
| <i>Foxn2/3</i>    | KY.Chr3.371     |
| <i>Foxo</i>       | KY.Chr6.627     |
| <i>Foxp</i>       | KY.Chr7.474     |
| <i>Foxq</i>       | KY.Chr3.324     |
| <i>Foxtun1</i>    | KY.Chr14.637    |
| <i>Foxtun2</i>    | KY.Chr14.1201   |
| <i>Foxtun3</i>    | KY.Chr10.939    |
| <i>Foxtun4</i>    | KY.Chr5.382     |
| <i>Foxtun5</i>    | KY.Chr12.963    |

|                  |               |
|------------------|---------------|
| <i>Gabpa</i>     | KY.Chr2.1145  |
| <i>Gata.a</i>    | KY.Chr6.625   |
| <i>Gata.b</i>    | KY.Chr4.1344  |
| <i>Gdf1/3-r</i>  | KY.Chr4.450   |
| <i>Gsc</i>       | KY.Chr4.686   |
| <i>Gsx</i>       | KY.Chr2.1386  |
| <i>Hand</i>      | KY.Chr14.359  |
| <i>Hand-r</i>    | KY.Chr1.2070  |
| <i>Hedgehog1</i> | KY.Chr8.497   |
| <i>Hedgehog2</i> | KY.Chr5.635   |
| <i>Hes.a</i>     | KY.Chr1.28    |
| <i>Hes.b</i>     | KY.Chr3.580   |
| <i>Hes.c</i>     | KY.Chr1.1234  |
| <i>Hey</i>       | KY.Chr10.1431 |
| <i>Hhex</i>      | KY.Chr1.1187  |
| <i>Hif</i>       | KY.Chr4.583   |
| <i>Hlx</i>       | KY.Chr11.1030 |
| <i>Hmbox1-r</i>  | KY.Chr1.858   |
| <i>Hmg1/2</i>    | KY.Chr14.924  |
| <i>Hmg20</i>     | KY.Chr1.127   |
| <i>Hmgtun1</i>   | KY.Chr12.809  |
| <i>Hmgtun2</i>   | KY.Chr5.1054  |
| <i>Hmgxb4</i>    | KY.Chr8.597   |
| <i>Hmx</i>       | KY.Chr8.1335  |
| <i>Hnf1</i>      | KY.Chr12.632  |
| <i>Hnf4</i>      | KY.Chr3.849   |
| <i>Hox1</i>      | KY.Chr1.1189  |
| <i>Hox10</i>     | KY.Chr1.2558  |
| <i>Hox12</i>     | KY.Chr7.704   |
| <i>Hox13</i>     | KY.Chr7.703   |
| <i>Hox2</i>      | KY.Chr1.2455  |
| <i>Hox3</i>      | KY.Chr1.2456  |
| <i>Hox4</i>      | KY.Chr1.2458  |
| <i>Hox5</i>      | KY.Chr1.2598  |
| <i>Hox6</i>      | KY.Chr1.2599  |
| <i>Id.a</i>      | KY.Chr7.1153  |
| <i>Id.b</i>      | KY.Chr7.1157  |
| <i>Irx.a</i>     | KY.Chr11.343  |
| <i>Irx.b</i>     | KY.Chr11.347  |

|                   |               |
|-------------------|---------------|
| <i>Irx.c</i>      | KY.Chr3.1404  |
| <i>Irx.d</i>      | KY.Chr3.1399  |
| <i>Isl</i>        | KY.Chr4.1318  |
| <i>Jag</i>        | KY.Chr11.1291 |
| <i>Jun</i>        | KY.Chr5.536   |
| <i>Lefty</i>      | KY.Chr3.1493  |
| <i>Lhx1</i>       | KY.Chr11.1327 |
| <i>Lhx2/9</i>     | KY.Chr9.235   |
| <i>Lhx3/4</i>     | KY.Chr13.449  |
| <i>Lmx1</i>       | KY.Chr9.589   |
| <i>Lmx1-r</i>     | KY.Chr9.594   |
| <i>Mad</i>        | KY.Chr1.761   |
| <i>Maf/a/b</i>    | KY.Chr12.532  |
| <i>Maff/g/k</i>   | KY.Chr12.534  |
| <i>Max</i>        | KY.Chr5.121   |
| <i>Meis</i>       | KY.Chr10.902  |
| <i>Meox</i>       | KY.Chr8.1018  |
| <i>Mesp</i>       | KY.Chr3.993   |
| <i>Mitf</i>       | KY.Chr10.837  |
| <i>Mlx</i>        | KY.Chr11.477  |
| <i>Mnt-r</i>      | KY.Chr6.608   |
| <i>Mnx</i>        | KY.Chr10.622  |
| <i>Mrf</i>        | KY.Chr14.1058 |
| <i>Mstn</i>       | KY.Chr3.534   |
| <i>Msx</i>        | KY.Chr2.1417  |
| <i>Myc</i>        | KY.Chr1.686   |
| <i>Net</i>        | KY.Chr9.174   |
| <i>Neurog</i>     | KY.Chr6.427   |
| <i>Nfe2</i>       | KY.Chr1.1136  |
| <i>Nfil3</i>      | KY.Chr5.623   |
| <i>Nkx2-1/4</i>   | KY.Chr10.964  |
| <i>Nkx2-3/5/6</i> | KY.Chr8.909   |
| <i>Nkx6</i>       | KY.Chr5.29    |
| <i>Nkxtun1</i>    | KY.Chr12.93   |
| <i>Nkxtun2</i>    | KY.Chr8.969   |
| <i>Nkxtun3</i>    | KY.Chr1.212   |
| <i>Nodal</i>      | KY.Chr14.1181 |
| <i>Nog</i>        | KY.Chr12.723  |
| <i>Noto</i>       | KY.Chr5.1093  |

|                   |               |
|-------------------|---------------|
| <i>Nr1d</i>       | KY.Chr13.291  |
| <i>Nr1h2/3</i>    | KY.Chr2.1479  |
| <i>Nr1h4</i>      | KY.Chr2.1300  |
| <i>Nr2c</i>       | KY.Chr8.539   |
| <i>Nr2e</i>       | KY.Chr6.665   |
| <i>Nr2f</i>       | KY.Chr8.1390  |
| <i>Nr4a</i>       | KY.Chr9.646   |
| <i>Nr5a</i>       | KY.Chr6.223   |
| <i>Nr6a</i>       | KY.Chr1.1411  |
| <i>Onecut</i>     | KY.Chr6.222   |
| <i>Otp</i>        | KY.Chr14.946  |
| <i>Otx</i>        | KY.Chr4.867   |
| <i>Pax1/9</i>     | KY.Chr11.1306 |
| <i>Pax2/5/8.a</i> | KY.Chr6.685   |
| <i>Pax2/5/8.b</i> | KY.Chr12.443  |
| <i>Pax3/7</i>     | KY.Chr10.303  |
| <i>Pax3/7-r</i>   | KY.Chr4.548   |
| <i>Pax6</i>       | KY.Chr9.1034  |
| <i>Pbx</i>        | KY.Chr13.445  |
| <i>Pdx</i>        | KY.Chr14.916  |
| <i>Phox2</i>      | KY.Chr14.181  |
| <i>Pinhead</i>    | KY.Chr2.772   |
| <i>Pitx</i>       | KY.Chr6.170   |
| <i>Pknox</i>      | KY.Chr11.941  |
| <i>polybromo</i>  | KY.Chr7.473   |
| <i>Pou2F</i>      | KY.Chr4.359   |
| <i>Pou4F</i>      | KY.Chr2.851   |
| <i>Pou-r</i>      | KY.Chr7.486   |
| <i>Ppar</i>       | KY.Chr8.993   |
| <i>Prdm1-r.a</i>  | KY.Chr12.980  |
| <i>Prdm1-r.b</i>  | KY.Chr12.977  |
| <i>Prdm1-r.c</i>  | KY.Chr12.975  |
| <i>Prdtun1</i>    | KY.Chr11.115  |
| <i>Prdtun2</i>    | KY.Chr1.1582  |
| <i>Prop</i>       | KY.Chr11.1073 |
| <i>Prox.a</i>     | KY.Chr4.62    |
| <i>Prox.b</i>     | KY.Chr4.64    |
| <i>Prrx</i>       | KY.Chr1.525   |
| <i>Ptfla</i>      | KY.Chr3.526   |

|                         |               |
|-------------------------|---------------|
| <i>Ptfla-r</i>          | KY.Chr11.543  |
| <i>Rar</i>              | KY.Chr9.692   |
| <i>Rax</i>              | KY.Chr12.292  |
| <i>Ror</i>              | KY.Chr3.206   |
| <i>Rxr</i>              | KY.Chr9.286   |
| <i>Shox</i>             | KY.Chr1.2618  |
| <i>Sim</i>              | KY.Chr6.618   |
| <i>Six1/2</i>           | KY.Chr3.556   |
| <i>Six3/6</i>           | KY.Chr10.279  |
| <i>Six4/5</i>           | KY.Chr3.1139  |
| <i>Smad1/5/9</i>        | KY.Chr2.1018  |
| <i>Smad2/3.a</i>        | KY.Chr6.515   |
| <i>Smad2/3.b</i>        | KY.Chr12.69   |
| <i>Smad4</i>            | KY.Chr6.342   |
| <i>Smad6/7</i>          | KY.Chr3.1211  |
| <i>Snai</i>             | KY.Chr3.1382  |
| <i>Sox1/2/3</i>         | KY.Chr1.559   |
| <i>Sox14/15/21</i>      | KY.Chr1.2243  |
| <i>Sox30</i>            | KY.Chr4.941   |
| <i>Sox4/11/12</i>       | KY.Chr7.659   |
| <i>Sox5/6/13</i>        | KY.Chr14.1160 |
| <i>Sox7/17/18</i>       | KY.Chr7.829   |
| <i>Sox8/9/10</i>        | KY.Chr11.676  |
| <i>Spdef</i>            | KY.Chr12.665  |
| <i>Spi1/B/C</i>         | KY.Chr6.534   |
| <i>Srebp</i>            | KY.Chr9.7     |
| <i>Ssrp</i>             | KY.Chr3.1078  |
| <i>T</i>                | KY.Chr12.6    |
| <i>Tbx1/10</i>          | KY.Chr7.563   |
| <i>Tbx15/18/22</i>      | KY.Chr9.115   |
| <i>Tbx2/3</i>           | KY.Chr4.1104  |
| <i>Tbx20</i>            | KY.Chr1.1392  |
| <i>Tbx21/Tbr1/Eomes</i> | KY.Chr3.529   |
| <i>Tbx6-r.a</i>         | KY.Chr11.460  |
| <i>Tbx6-r.b</i>         | KY.Chr11.470  |
| <i>Tbx6-r.c</i>         | KY.Chr11.469  |
| <i>Tbx6-r.d</i>         | KY.Chr11.468  |
| <i>Tcf15-r</i>          | KY.Chr11.73   |
| <i>Tcf3</i>             | KY.Chr3.781   |



|                  |               |
|------------------|---------------|
| <i>Tcf4</i>      | KY.Chr4.1160  |
| <i>Tcf7</i>      | KY.Chr6.60    |
| <i>Tef/Hlf</i>   | KY.Chr14.42   |
| <i>Tfap2-r.a</i> | KY.Chr1.1901  |
| <i>Tfap2-r.b</i> | KY.Chr7.1173  |
| <i>Tgfb1/2/3</i> | KY.Chr3.1499  |
| <i>Tgfbtun1</i>  | KY.Chr5.606   |
| <i>Tgfbtun2</i>  | KY.Chr1.1371  |
| <i>Tgfbtun3</i>  | KY.Chr2.1400  |
| <i>Thr</i>       | KY.Chr11.1143 |
| <i>Tlx</i>       | KY.Chr1.1455  |
| <i>Tox</i>       | KY.Chr3.766   |
| <i>Tp53/73.a</i> | KY.Chr1.1942  |
| <i>Tp53/73.b</i> | KY.Chr3.226   |
| <i>Trh</i>       | KY.Chr11.674  |
| <i>Twist-r.a</i> | KY.Chr5.356   |
| <i>Twist-r.b</i> | KY.Chr5.355   |
| <i>Twist-r.c</i> | KY.Chr5.357   |
| <i>Ubf</i>       | KY.Chr2.1521  |
| <i>Unc.a</i>     | KY.Chr5.106   |
| <i>Unc.b</i>     | KY.Chr11.892  |
| <i>Usf</i>       | KY.Chr3.1438  |
| <i>Vdr.a</i>     | KY.Chr2.1584  |
| <i>Vdr.b</i>     | KY.Chr10.739  |
| <i>Vsx</i>       | KY.Chr11.1126 |
| <i>Wnt10</i>     | KY.Chr13.110  |
| <i>Wnt3</i>      | KY.Chr9.955   |
| <i>Wnt5</i>      | KY.Chr4.1328  |
| <i>Wnt7</i>      | KY.Chr8.1185  |
| <i>Wnt9</i>      | KY.Chr9.610   |
| <i>Wnttun1</i>   | KY.Chr6.556   |
| <i>Wnttun2</i>   | KY.Chr12.713  |
| <i>Wnttun3</i>   | KY.Chr2.458   |
| <i>Wnttun4</i>   | KY.Chr5.350   |
| <i>Wnttun5</i>   | KY.Chr9.807   |
| <i>Xbp1.a</i>    | KY.Chr4.754   |
| <i>Xbp1.b</i>    | KY.Chr10.1174 |
| <i>Xbp1.c</i>    | KY.Chr8.629   |
| <i>Xbp1.d</i>    | KY.Chr8.1015  |

|                |              |
|----------------|--------------|
| <i>Zfhx3</i>   | KY.Chr3.191  |
| <i>Zhx1-r</i>  | KY.Chr3.15   |
| <i>Zic-r.a</i> | KY.Chr1.1698 |
| <i>Zic-r.b</i> | KY.Chr6.26   |
| <i>Zic-r.c</i> | KY.Chr6.27   |
| <i>Zic-r.d</i> | KY.Chr6.28   |
| <i>Zic-r.e</i> | KY.Chr6.29   |
| <i>Zic-r.f</i> | KY.Chr6.30   |
| <i>Zic-r.g</i> | KY.Chr6.31   |

---

**Supplementary Table S7. Primers used for experimental evaluation of inversions**

| <b>Primer</b> | <b>Nucleotide sequence</b>         |
|---------------|------------------------------------|
| primer1       | 5'-GGCTATGTGGAAGTTCAGTTGGACAT-3'   |
| primer2       | 5'-TTCCTTTGTTGACCGAAACTGGTCAC-3'   |
| primer3       | 5'-GGTCGATCATGGTGATACATTGGAAGT-3'  |
| primer4       | 5'-GTTCCGTGTTATGCTTTCGGAATGCT-3'   |
| primer5       | 5'-TTTGGCAAACAACGTACGATTCCAGAA-3'  |
| primer6       | 5'-CCTTGTAATGTTTCATTGTGTTCTCCTA-3' |
| primer7       | 5'-TTGACCTGCCCGATCAAACATCTGAT-3'   |
| primer8       | 5'-TTTACCGACAGTATATTTAGGCACAAGT-3' |
| primer9       | 5'-ATCATAGACCAGTACCTAGAAGGCTTT-3'  |
| primer10      | 5'-AGTCATGGTACAAGGTGTATATGTGCT-3'  |
| primer11      | 5'-TACTGCCATCTGACGGACGTTACCA-3'    |
| primer12      | 5'-CACGCGACTTATTTAATACGAGGGAAA-3'  |
